# Supplementary material for: Bidirectional regulation of postmitotic H3K27me3 distributions underlie cerebellar granule neuron maturation dynamics
Source: eLife. 2023 Apr 24;12:e86273. doi: 10.7554/eLife.86273 (PMC10181825; doi:10.7554/eLife.86273)
Supplement: Supplementary file 3. [file elife-86273-supp3.xlsx]

## Sheet: Figure S1
Cluster 1		Cluster 2		Cluster 3
Alkal2		Atp6v0d2		Cysltr1
Dcdc5		Ccdc102a		AC133451.2
H3f3b		Acot2		BC016579
Htr2a		Clec7a		Cnksr1
Ifi203		Gjd3		AA474408
Mc5r		Crlf1		Cd46
Purg		Gpx8		Trdc
Cdh10		Samd3		Muc6
Ccdc105		Ptf1a		AC166575.1
Xlr3b		Ttn		Pln
Bach1		Islr		Cd3e
Grm5		Gmfg		Ifi44
Lingo2		Igf2os		Sdhaf3
Slc7a3		Podn		Nudc-ps1
Col6a4		Col5a1		Ceacam2
Duoxa1		Foxl2os		AC132288.2
Htr7		Lefty2		Mir328
Rasgef1b		Erfe		Mas1
Ush2a		Igf2bp1		Fbxw15
AC115752.1		Gabrq		Gucy2e
Allc		Nxnl2		Ryr1
Otc		Smoc1		Sh2b3
Krt2		Zbtb42		Cd209b
Fhl4		Dnah7a		Atp6v1b1
Tex14		Mir6236		Fgf11
Scd4		Prrx2		Ppp1r16b
Slpi		Dnm3os		Car15
Abca12		AI838599		Myl2
Cd9		Nphs1os		Il10ra
Arhgap9		Vegfd		Fcrlb
Ermap		Lrig3		Prrt1
Ptpn20		Sox9		Fam92b
Glt8d2		Brca2		Ifit1
Sucnr1		Cacng1		Dennd2d
Dusp9		C4b		Scnn1b
Kank4os		Cfap57		Aifm3
Cngb1		Pax2		Brinp1
Fcmr		Erich2os		Ccdc74a
Prph		Srebf1		Snph
Duoxa2		Npy2r		Mir23b
Igsf1		Adcy7		Kcnh3
Chrm3		Adam33		Ldoc1
Zc3h12d		Gse1		Tm6sf2
Tubb2a		Ripk3		AC122117.2
Abtb2		Chrna4		Appl2
Nkain1		Dlgap2		Got2-ps1
Lct		Gsg1l		Dcst1
Gpr17		Sctr		Hspa12a
Mvk		Cbln4		Mfsd6
Tmsb15b2		Laptm5		Tmem181c-ps
H3f3a		Notch1		Cntnap4
Aacs		Plcb2		Ehd3
Numbl		AC113599.1		Oaz1-ps
Mvd		Fendrr		Ankrd33b
Ppm1n		Tspan32os		Cd300a
Samd14		Sec16b		Synj2
Krt71		Ccdc171		Pak1
Fxyd7		Dll1		Kbtbd11
Smim18		Glcci1		Parm1
Csmd2		Acr		Adgrf4
Oprl1		Lama3		Pgk1
Fbp1		Frem3		Cd59b
Shisal1		Sorbs2os		Sbk3
Rab25		Gli3		Tle2
Adad2		Sned1		Haglr
Entpd2		Pik3c2g		Faah
Ebi3		Apol7d		Erich3
Lcp2		Fut4		Scnn1g
Ackr2		Adnp		Lurap1
Zfp428		Hhat		Coro6
C1ql2		Gpr153		Kcnt1
Maff		Inpp5d		Plcd4
Serpine1		Mchr1		Abca2
Myl4		Foxl2		Car10
Trim10		Zmynd15		Fah
Ecscr		Dbh		Grin1os
Krt9		Olfr77		Kif5a
Fam89a		Vwc2l		Lrrc49
Tmem176b		Cdh9		Fn3krp
Msc		Rmst		AA986860
Pnoc		Kcnv2		Tmem201
Socs1		Fam19a2		Tceal6
Acaa1b		Slc10a4		Klhdc7b
Krt74		Fibcd1		Fmnl1
Rpl19-ps11		Rest		Fgd3
AC157548.2		Epb41l2		Doc2b
Morc1		Cdh5		Tbc1d8
AC147020.1		Zfp853		Trim9
Cacna1f		Tenm2		Ptpn22
Gpr27		Nkain3		Large1
Zfp811		Ets1		Nrip2
Avpr2		Cyp26b1		Plekhd1
Rgs9bp		Tdrd1		Sptssb
Cldn3		Tmem26		Washc2
Mndal		Wnt5a		Slc9b1
Optn		Slitrk6		Tcea1-ps1
Cdh13		Evpl		Cyp2u1
Tuba1a		AW121686		Igtp
Dynll1		Tnfrsf13b		AC124316.1
Prr3		Sall3		Prickle4
L1cam		Lrp2		Tldc2
Myod1		Pou3f4		Opn3
Amelx		Btk		AC165153.2
Gdf3		Trim29		Mrgprh
Lpar5		Hapln3		Dspp
Fam240b		Tmc8		Inpp4a
Blvrb		Slc6a2		Htr1b
Sertad3		Slc6a3		Dgkb
P2rx1		Aff2		Tmem144
Myo1a		Irx2		Pip4k2a
Rprm		Got1l1		Mppe1
Sipa1l2		Acvr2b		Slc35f3
Cfap58		Syna		Epm2a
Vinac1		AW551984		Fam13a
Shisal2b		AC107792.3		Olfr545
Necab2		Gbx2		Mapk10
Pde1b		Tnfrsf22		Nap1l2
Mlkl		Adgrg2		Dnajb4
Tekt2		Cntnap3		Atxn1
AC161579.1		Lncenc1		Vsnl1
Pi15		Phox2b		Srrm3os
Col12a1		Tmc1		Snap25
Piezo2		C2cd4d		Slc2a13
Mroh3		Camkv		Rnf128
Myct1		Tacr1		Plekha3
Cdh23		Bik		Spop
Eln		Hk3		Chdh
Krt19		Vstm2l		Dnajb9
Col1a2		Mir219b		St3gal5
Col6a1		Atp8b3		Ace2
Fcna		Tssk6		Ttpa
Rab44		Pbx4		Cyp2f2
Sash3		BC106179		Mpp7
Csf2rb2		Myo1g		Rtl4
Ptafr		Gal		Aldh3a1
Ccl6		Acap1		Iigp1
Npsr1		Asic4		AC165962.3
Nox4		Parvg		Il11
Ly75		Rftn1		Iltifb
Tbx4		Fadd		Rubcnl
Loxl2		Pax5		Ralyl
Slc26a5		Jak3		Snx25
Serpina3n		Rgma		Olfr558
Car3		Rhcg		Cnn1
Nos2		AC107792.1		Hfe
Fbn1		Aox4		Pvr
Galr1		Best1		Atp6v1d
Sh3rf3		Ctc1		Corin
Lzts1		Ddx11		Bbs4
Tanc2		Irx4		Nat8
Inhbb		Ccdc116		Mat2b
Abcc3		Mcm2		Hprt
Myo15b		Ascl1		Fbxo33
Rai2		Fam19a3		C1galt1c1
Cpa6		Tmem39b		Tnfrsf11b
Nr2e3		Hist1h2bm		Prr16
Slc28a1		AC131692.1		Pip5k1b
Kcnk2		Ube2nl		Nme7
Sec14l3		Vmn1r85		Nipal2
Sez6		Tfap2c		Cdadc1
AA387200		Trpa1		Ceacam1
Lingo1		Fgf15		Sdcbp
Htr3a		Gsx2		Lrrc2
Gfra1		Tex16		Fzd4
Pld6		Hist1h2aj		Enpp5
Actl10		Hist1h3h		Cyp4v3
Halr1		Ucn3		Tmtc1
Klf14		Znrf4		Trpm3
Khdc3		Eef1akmt4		Serpinb9
Tsga13		Ccdc61		Aph1c
AC154538.2		Hmg20b		Rarb
Slc26a9		Lrrc25		Insig2
Rspo4os		Pkn3		Nkiras1
Mir7049		Pcna		Fam45a
Sdk1		Cenps		Atp6ap2
Tmem210		Cfap77		Zfp354b
Adamts18		Ripor3		Zfp874a
Bcl2l11		Recql4		Smim10l1
Fam184b		Clic1		Rad9b
Atp10b		Rcc2		Cytl1
Ccnjl		Klf16		Itgbl1
Slc2a9		Six5		Hnmt
Adam19		Pold1		Rnf11
Kcnip2		C1ql4		Omd
Zfp46		Mesp2		Tgfbr3
Plxna2		Actc1		Aldoart2
Barx2		Trpv6		L1td1
Ky		Vgll4		Sh2d1a
Pcdha9		Efcab6		Uqcrb
Col9a1		Mdk		Ece1
AC161438.1		Cdk2ap1		Aqp6
Rag1		Ttc22		Bdnf
Rbm20		BC024139		Camta2
Sqle		Lrrc10b		Tmem8
Gal3st1		Tonsl		Grb7
Gpr15		Mical1		Olfr922
Bfsp2		Rpl5-ps2		Inpp5a
Dhcr24		Sp9		Mapk12
Phlda1		Kifc5b		Mreg
Sirt2		Wdr90		Khnyn
Kctd5		Ccdc38		Cyb5r1
Neu4		Cfap61		Tob2
Alox5		Fam221a		Zfp385a
Smarcd3		AC154652.2		Prl2c2
Nlrp6		Bbs12		Rab3a
Ephb1		Sectm1a		Chrdl1
Zdhhc22		Fndc3c1		Cnpy1
Kif19a		Klk4		Nr0b2
Lrrc26		Fam19a4		Clcn1
Pdyn		Nr2f1		Prss57
Arpc1b		Olfr1372-ps1		Zfp52
Bhlha9		Cish		Zfp758
Mia		Lst1		AC109619.1
Brinp2		Ptgr1		AU022793
Pla2g4d		Lhx3		Prkcz2
Cemip		Upp1		Ccdc9b
Lsp1		Adgrd1		Cd5
Dynlt1b		Palm3		Ttc39aos1
Adipoq		Prr19		Mir453
Mpzl1		Rpsa-ps9		Rreb1
Hspa2		Bok		Fyco1
Plb1		Pdlim4		Hrh1
Iyd		Pilra		Cyp4x1os
Sh3gl3		Rps18		Pigk
Fgf10		Smo		Pdzph1
Dhrs7c		Cd63		Cdnf
Klf10		Cep41		Cyp4x1
Gja5		Pycard		Malt1
Tnnc2		Idh2		Gnal
Gng12		Fpgs		Galnt5
Enpp6		Rassf7		AC115119.1
Slc22a21		Rpl38		Zfp941
Mal2		Dctpp1		Gabrb1
Nav3		Cand2		Dnm3
Epha2		Rpl35		Dnah6
Slc16a1		BC030500		Dennd5a
Gem		Tlx3		Cntn3
Mfap5		Tuba1c		Cnr1
Lox		Rbpjl		Cdc14b
Ocm		Rps8		Aak1
Sult6b1		Tysnd1		Abca5
Efcab8		AC122861.4		Vps13c
Lactbl1		Slurp1		Usp31
Smyd1		Hist1h2ae		Tmem255a
Gpr50		Mir762		Tll1
Slc16a14		AI849053		St8sia1
Sfmbt2		Scand1		Smg1
Aldh3b2		Rasal3		Smad9
Arrdc4		Ddx31		Scn2a
Cpa4		Epsti1		Plcb4
Rpl9-ps8		Lbx1		Nceh1
Glra2		AC126937.1		Mcc
Serpinb8		Dut		Epas1
Kcns1		Eme1		Mblac2
Slc30a3		Lhx5		Ppargc1a
Txnip		Naip5		Cpeb3
Dok6		H2afx		Thsd7a
Nyap2		Tmem121		Vps13a
Atp8b1		Tpt1		Ptchd1
Lrp8		Zfp579		Tead4
Ap1s3		Hck		Rapgef4os3
Chp2		Hpdl		Tmed10-ps
Fam198b		Gck		Atp10a
Rap2a		Srpx		Itpkb
Fgf13		Neil2		Gipc3
Cyp51		Pklr		Pcsk2os1
Nectin3		Rnaset2a		AC166748.2
Rras2		Cdca7l		Dock5
Wnt10b		Cxcr5		Cyp3a13
Sync		Arhgap40		Serpinb1a
Hmgcs1		Hist1h2ab		Sipa1l1
Klhl5		Apon		Cntnap5c
Pabpc5		H2-Q7		Plxna4os3
Slco4c1		Haus5		Chrna7
Sema3d		Lyar		Tekt4
Spn		Tnnt1		Togaram2
Zfp872		Efs		Arhgap27
Tbr1		Proser3		Ccdc155
Ces2b		Aunip		Magix
Eda		Nlrp5-ps		Mfsd7a
Olfr279		Gramd2		Hpse2
Myom3		Nradd		Anxa11os
Cfi		Cdc25b		Odf3b
Tmem215		Hps1		Traf1
Aoc3		Enkd1		Cysrt1
Gata3		Hcn3		Cfap161
Dll4		Spsb4		Itgal
Pou3f1		AI480526		Zfp296
Asap3		Ing4		AC102055.1
Sst		Ttc26		Eno4
Trpm5		Ccdc142		Scx
Alx3		Mir135a-2		Ism1
Htr5b		Dzip1		Hacl1
Meox1		Igsf6		Sult1a1
Cnfn		Styk1		Avil
Tmem91		Zcwpw1		Cited4
Casr		Carnmt1		B4galnt3
Thsd4		Cd4		Crispld2
Mfsd2a		Anp32b		Acacb
Tcerg1l		Hmgn5		Aqp5
Apoc1		Palb2		Wnt6
Emid1		Cc2d2b		G0s2
Nptx2		Hmga2		Mir412
Ppp1r1a		Tfap2a		Adamtsl5
Cpa2		Hpgds		Alad
Retnla		Bmp3		Ttll3
AC124108.1		Naaladl1		Rpp25
Ly6d		Tomm6		AC142448.2
Tmem114		Tacr3		Ptprn
Cpz		Gpr183		Myadml2
Rhbdf2		Sox2		Sp6
Bace2		Arglu1		Synpo
Snca		Zgrf1		Cfap74
Plaur		Mtap		Tap2
Ces5a		Mrc1		Dcxr
Hmcn2		T		Syde1
Zan		Mns1		H2-K1
Rab3d		Prtg		Macrod1
Il19		Cenpj		Yipf7
Necab3		AC061963.1		Cys1
Traf3ip3		Vim		Fam160a1
Srd5a1		Hgfac		Nbl1
Angpt4		Tmem106a		Ptgds
Nyx		Scube2		Slc47a1
Gdf10		Frrs1		Krt80
Erp27		Dab2		H2-Q1
Npb		Slc25a24		Tspan8
Dact1		Nsun7		Thbd
Tmem182		Hpse		Slc22a18
Frzb		2022-09-10		BB187690
Ntf3		Gar1		Eps8l1
Wif1		Tex30		Mir378a
AC163347.1		Zfp202		Pkd2l1
Hpgd		Krt12		AC131712.1
Epha3		Haus4		BC049352
Slc38a8		Uaca		Elmo3
Spag17os		Cd209f		Cyp4f41-ps
Slc13a1		Cntrob		Hs3st6
Synpr		Crip3		Hsf4
Bpifb6		Fndc9		Ankub1
Sis		Cep112os1		Mypopos
Myh13		Rrp15		Il2ra
Nccrp1		Aim2		Tppp3
Elf3		Cep131		Gstt1
Gabrr1		Gins2		AC136921.2
Glyatl3		Zfp90		H2-Aa
Il23a		Nup107		Mon1a
Scn11a		Hells		Mapkapk3
Syndig1l		Glce		Nat14
Ngf		Fancf		Npy
Rilp		Ezh2		Ifi27
Tsga10ip		Esco2		Nr1h3
		Dleu7		Slc27a5
		Dck		Fth1
		Ckap2		Plin4
		Cenpf		Ifit1bl2
		Cenpe		Gtsf1l
		Ccnb1		Hist1h2ac
		Arhgap19		Mroh7
		Actb		Hist1h1c
		Zranb3		Xaf1
		Trim24		Cd274
		Spc25		Ppef2
		Rad18		Sapcd1
		Prc1		Cfap53
		Nusap1		Ubap1l
		Nuf2		Aldob
		Ndc80		Prl
		Mex3b		Ppp1r3g
		Kif18a		Tmprss5
		Kntc1		Tmem190
		Il17rd		BC018473
		Gckr		Fmo2
		Efcab5		Mdh1b
		Dtl		Comp
		Col11a1		Fam117a
		Ckap2l		Gpt
		Cep55		Gsta3
		Cenpw		Pcolce2
		Ccdc36		Cd300lg
		Bach2		Nek11
		Adamts19		Fhad1
		Zim1		Qprt
		Unc13b		Capsl
		Tox3		Rsph4a
		Tex15		Cab39l
		Sfxn2		Spaca9
		Rnasel		Nme5
		Paupar		Ass1
		Neil3		Nmbr
		Map3k1		Efcab12
		Mad2l1		Entpd3
		Polq		Lrrc23
		Tubb2a-ps2		Mycbpap
		Pkp1		Inmt
		Pjvk		Tbc1d2
		Robo3		Ppp1r36
		AC142100.3		Camk1
		Cad		Tspo
		Aoc2		Fam47e
		Arhgef40		Sptlc3
		Lig1		Pla2g5
		Fbxo10		Sfrp5
		Efna4		Serpinb1b
		Dbn1		Dsg2
		Dazap1		Lgals3bp
		Csnk1e		Ntf5
		Cdh24		Klhdc7a
		Camsap3		Nr6a1
		C2cd4c		Smim5
		Barhl1		Sulf1
		Atxn7l2		Abca8a
		Arhgap33		Acss3
		Zfp362		Dazl
		Ybx2		Efcab9
		Tmem200c		Rsad2
		Rimbp3		AC144860.4
		Ptpn5		Fam107b
		Ptch2		Ifih1
		Plppr3		Il13ra2
		Nol3		Zxdb
		Mgat5b		Crebrf
		Kcnh8		Bmp8a
		Kifc1		Mbnl1
		Lmtk3		Ghrl
		Limk1		Usp45
		Lrrc3		Meioc
		Kdm4a		Prkg1
		Map6		Irak3
		Mcm7		Tbc1d8b
		Mir6991		Polk
		Mxd3		Cltrn
		Igsf9		Gbp5
		Nxph4		Tmem220
		Otx1		Zc3hav1
		Pak6		Ogn
		Papln		Bdkrb2
		Gsdmd		Fbxw10
		Fgd5		Gh
		Dpysl5		Efemp1
		Ccdc40		Map3k8
		Adcyap1r1		Prg4
		Zbtb9		Cxxc4
		Vat1		Mettl5os
		Usp44		Dnah11
		Trp53		Pcgf5
		Tekt5		Neat1
		Sh3pxd2b		Pappa
		Sh2b2		Parp4
		Sdc3		Zfp970
		Rtl5		Cd300lb
		Pcsk9		Exoc3l4
		Atoh1		Rnf125
		Kif21b		Jhy
		Map4k4		Abca6
		Mdga1		Il17rb
		Hcrtr1		Ttc39a
		Grin2d		Vipr2
		Grik5		Wnt16
		Flna		Ccn2
		Epb41l4a		Mpzl2
		Enc1		Cutal
		Dchs1		Slc13a4
		Cbln2		Enpp2
		Cacng4		Prlr
		Afap1		Cabyr
		Zfp663		Csgalnact1
		Yeats2		Evi2a
		Vav2		AC113961.1
		Tedc1		Apod
		Srpk3		Hddc3
		Smurf1		AC131323.2
		Prx		Tgm7
		Pole		Angptl3
		Phc1		Loxhd1
		Nup210		Lmod1
		Npffr1		Tmem62
		Nol4l		Trcg1
		Ncan		Hcar1
		Nav1		Isg15
		Mybl2		Gstt3
		Kif7		Mgp
		Kif22		Cdh1
		Islr2		Lrrc8a
		Mta1		Nmur1
		Nsl1		Slc9a2
		Pcgf2		Slc6a12
		Foxm1		Acyp2
		Efnb1		Rspo3
		Asf1b		M6pr-ps
		Atat1		Sidt1
		Aurkb		Fam213a
		Wdr62		Il15
		Trp53i11		A2m
		Traip		CT025671.2
		Tmem131l		Gng11
		Tmem121b		Ackr4
		Timeless		Tdgf1
		Sox12		Parp3
		Sncaip		Tinagl1
		Scmh1		Apof
		Rhno1		Cmbl
		Ptk7		Slc5a5
		Prr36		Prelp
		Pou2f2		Pla1a
		Plxna3		Slc6a20a
		Phf21b		Atp6v1fnb
		Dhcr7		AA914427
		Odf4		Lin52
		Sulf2		Lyn
		Bahcc1		Hspa1b
		Micall2		Hibadh
		Msi1		Gla
		Oacyl		Ggact
		Hdac7		Akain1
		Zfpm1		Anxa7
		Ptprs		Ubl3
		Cep192		Sqor
		Cntln		Slc25a21
		Crybg3		Shisa5
		Dis3		Pex11b
		Qser1		Nat8f1
		G2e3		Extl2
		Hnrnpd		Gskip
		Dach1		Hadhb
		Nhs		Nipsnap2
		Ldb2		Klhdc1
		Nr5a2		Tifa
		Tead1		Ipcef1
		Ccdc62		Fmn1
		Nop58		Abca8b
		Sbsn		Bend6
		Usp49		Crebl2
		Dhx9		Spock1
		Kbtbd6		Socs5
		Lilrb4a		Pparg
		Ndnf		Neb
		Stxbp6		Nat8f4
		Atad5		AC122487.2
		Blm		Upp2
		Brd3		Kcns3
		Suv39h2		Mapre2
		Ccdc18		Jaml
		Prpf40a		Errfi1
		Ncapg2		Bbox1
		Mcm4		Ubash3b
		Clmp		Tollip
		Mn1		Sgtb
		Nsd2		Itm2b
		Ppip5k2		Iqck
		Rbl1		Nat8f5
		Fign		Necap1
		Cenpu		Gabra6
		Armcx4		F3
		Topbp1		Sost
		Stk38		Stat5b
		Slitrk5		Ppp1r17
		Pcdh15		Plscr2
		Nemp2		Plekhb2
		Wsb1		AW046200
		AI182371		Asb11
		Egfem1		Ptk2b
		Jmjd7		Cst6
		Ppp1r18os		Tprkb
		Txnrd3		Naaa
		Mapkapk5		Tnfsf13
		Fbxo48		Meltf
		Prickle2		Ccn5
		Tfdp2		Ociad2
		Haus6		Sp100
		Lin28b		Aass
		Tex9		Agbl2
		Col24a1		Cd59a
		Zfhx3		Ctxn3
		Tcf7l1		Hspa1a
		Asb17		Afg1l
		BC046251		Cd83
		Mkrn3		Ppfibp2
		Il27ra		Pcp4l1
		Agtr2		Immp2l
		Stfa1		Amd1
		Arpc5		Sgk1
		Hist1h3i		Mrap2
		AC133525.2		Oma1
		Slc18a3		Ripply2
		BC100530		Sec11c
		Il18rap		Ly6c1
		Pgr15l		Folh1
		Calca		Arsg
		Icam1		Chil5
		Krt7		St3gal4
		Zfp648		Rit2
		Cd33		Rbm43
		Ccdc14		Pla2g16
		AC126040.2		Nap1l5
		Adamts20		Dync1i1
		Zfp462		Abcc12
		Nin		Atp6ap1l
		Map7d3		Cgrrf1
		Klf11		Tmem178
		Il1rl2		Rasl11b
		Fam126a		Psg16
		B3glct		Mkks
		Asxl3		Map2k1
		Adamts12		Lrrc3b
		Apaf1		Gnmt
		Zfp36l1		AW209491
		Slco5a1		Slc35g2
		Robo1		Slc25a14
		Prrc1		Irgm2
		Pcdh18		Nat8f3
		Nid1		Rbks
		Neto1		Lhfp
		N4bp2		Kcnk1
		Mastl		Sh3gl2
		Onecut2		Ostn
		Apc		Slc5a1
		Ednrb		Ccdc107
		Klf3		Chchd10
		Mmp16		Cstb
		Cbfb		Pcbd2
		Unc5c		Tmem102
		Ptprc		Abhd12
		Dcaf12l2		Rabgef1
		Rbms3		Lgi1
		AC098880.1		Itpk1
		Dkk2		Itih3
		Adamts5		Gjb6
		Gpr21		Fmo5
		Jag1		AC154366.4
		Cd93		Bcar3
		Slc40a1		Cables1
		Gk5		Usp2
		AC158975.2		Tef
		Tcfl5		Pik3ip1
		AU020206		Nmnat2
		Casp8		Lysmd2
		Cenpq		Herpud1
		Tbx18		Fbxo9
		Slc38a4		Atp6v1b2
		Pdgfc		Slc25a33
		Mis18bp1		Ndrg3
		Lrrc17		Dbp
		Lpl		Wnt7a
		Lama4		Acad8
		Fli1		Cyb561
		Samsn1		Sod3
		Clec1a		Mir670hg
		Kcnt2		Ankrd9
		Cdh6		Sugct
		Dach2		Scg5
		Prdm1		Proca1
		Nexmif		Rpe65
		Lcorl		Cldn10
		Ammecr1		Krt24
		Calcrl		Lppos
		Tceanc		Echdc3
		Spast		Dusp28
		Nfia		Ctsb
		Minar1		Clu
		Mbtd1		Cidea
		Cnot6		Ccdc136
		Zbtb10		Tyro3
		Pde3a		Tor3a
		Man2a1		Tmem266
		Itgb1		Rnh1
		Tmem232		Retsat
		Zfp607a		Rab11fip1
		AC151275.1		Plk5
		Fam76b		Mlph
		Spin4		Mt2
		Cd36		Gstm1
		Ccnyl1		BC039966
		Mcmdc2		Xkrx
		Smarca5-ps		Rhpn2
		Panct2		Pnpla7
		Pcdh11x		Pnpla2
		Trim36		Bag3
		Fbxl12os		Pde6g
		Gng2		Mocos
		AC106834.1		Aox1
		Nras		Gkn3
		Trp53inp1		Maob
		Robo2		Itm2c
		Slc44a5		Golga7b
		Klf8		Gabrd
		Kcnb2		Fndc10
		Zfp945		Ephx1
		Hmgcr		Eno2
		Zfp711		Dnajc12
		Zic5		Chgb
		AC154486.3		Asgr1
		Pabpc4l		Arl6ip5
		Lpar4		Zfp235
		Tia1		Trpc7
		Cmah		Stard10
		Myef2		S1pr1
		CT573017.2		S100b
		Dock7		Rnd1
		Prkd3		Prkcd
		Mum1l1		Pnpo
		Tpt1-ps3		Ndrg2
		Khdrbs1		Mdh1
		Nfxl1		Fmod
		Zc3hav1l		Serpind1
		Syncrip		Nupr1
		Apcdd1		Dio3os
		Casp7		Adamts10
		Cd109		Asrgl1
		Elk3		Chst9
		Pou6f2		Tapbpl
		Kdr		Ajap1
		Fbn2		Ppp1r3c
		Aplnr		Cdr1
		Cgas		Cnnm4
		Cxcr4		Tnfsf13os
		Slc22a3		Rorc
		Pabpc1		Rom1
		Htr1a		Gbp2
		Ahrr		Spns3
		Myo3b		Stxbp2
		Adamts7		Ephx4
		F13a1		Hist2h3c2
		Ntsr1		Irf7
		Adam12		Ifit3
		Fbln2		Tac4
		Prokr1		Emilin3
		Grp		Gpr68
		Foxn4		Hpn
		Mir296		Mvp
		Clec14a		Mirg
		Prcp		Idh3g
		Cubn		Hdac11
		Tmem252		Gmppa
		Peg12		Fbxo2
		Gypc		Dnajb2
		Impdh2		Cpsf4l
		Ggta1		Ccdc190
		Orc1		Car11
		Arhgap18		B3gat3
		Emp1		Aco2
		Rpl10		Acss2os
		Postn		Zcchc18
		Lyve1		Spsb2
		Foxq1		Snx21
		Malrd1		Slc39a13
		Afmid		Retreg2
		Edaradd		Psen2
		Minar2		Pmm1
		Dchs2		Nrsn2
		Rgs9		Nfs1
		Ptgfrn		Mtln
		Pdzrn4		Klhl26
		Fstl1		Ifit3b
		Enpp3		H2-K2
		Rai14		Fuom
		Igf2bp2		Fbln7
		Dera		Dnaja4
		Slc7a1		Dis3l
		Mmrn1		Cryzl2
		AC166172.3		Bola3
		Il1rapl2		Acot13
		Mplkip		Ypel4
		Mcidas		Tspan33
		Cmtm3		Tm2d3
		Zfp36l2		Slc4a2
		Slc43a3		S100a1
		Nedd1		Ntsr2
		Klhl14		Nr1i3
		Dmrta2		Nfatc2
		Trpc4		Mt3
		Sec24d		Metrn
		Angptl4		Mcfd2
		Hs3st2		Lcat
		BC034090		Kazald1
		Cox6a2		Gpr108
		Prkd2		Gls2
		Lhx2		Glo1
		Lemd1		Gabarapl1
		Mylk2		Ddit3
		Snai1		Creg1
		Piwil1		Cdc42ep4
		Hist1h2ai		Cd70
		Krtap7-1		Auh
		Irs4		Capn3
		Ccna1		Car4
		Col4a6		Tusc2
		Nckap1l		Tnfsf12
		Lama1		Tmem59l
		Nfam1		Syndig1
		AC126937.2		Suox
		Tal1		Srxn1
		Slc7a5		Pttg1
		Sema5b		Ppp1r1b
		Cckar		Ppp1r11
		Mir1905		Pithd1
		Arap3		Mmp23
		Thsd1		Mettl7a1
		Tbx2		Mcemp1
		Smtn		Ldhb
		Lrfn2		Krt25
		Irf8		Idh3b
		Obscn		Hps6
		Sox18		Hdac5
		B4galt1		Fndc5
		Ccdc110		Esrra
		Cdkn1c		Dnajc4
		Mlxipl		Dexi
		Cep89		D17H6S53E
		Ifitm2		Cryab
		Bgn		Acsbg1
		Pawr		Bcl7b
		Crtap		Brd3os
		Scarf2		Cabp1
		Id1		Cd74
		Myo18b		Tpra1
		Thsd7b		Tomm40l
		Dusp27		Tmem109
		Rac2		Tceal3
		Lrrc63		St6galnac6
		Myo1f		Slc25a29
		Tulp1		Sdr39u1
		Bfsp1		Rpusd1
		Emilin1		Rnf112
		Hmgcs2		Prr13
		Ccdc8		Pianp
		Cdhr1		Pex10
		Egflam		P4htm
		Sipa1		Nudt18
		Ptgdr2		Ndufb10
		Itga5		Mus81
		Loxl1		Ccdc42
		Psmg4		AC153155.1
		Folr2		Abhd16a
		Ntrk1		Selenom
		Rflna		Hmgcl
		Tagln2		Nkx6-2
		AC125458.1		Kcnk3
		Hspb1		Hes3
		Cd79b		Galnt18
		AU021092		Ficd
		Pmepa1		Dusp10
		Rpsa-ps11		Dnaja3
		AC134546.1		Cops7a
		Fam162b		Acbd4
		Cldn19		Aldoa
		Ror2		Ankrd40
		Mamdc2		Anxa5
		L3hypdh		Ccdc69
		Mylk3		Tspan7
		Insm2		Tceal5
		Galntl6		Slc9a3r2
		Cnn3		Rgs16
		Asb15		Psap
		Ube2t		Pink1
		Ripply3		Phkg1
		Nudcd2		Pacsin3
		Sh3yl1		Insrr
		Dkk3		Mul1
		Aard		Mrgprf
		Nrarp		Mif4gd
		Vwa2		2022-03-02
		Myh8		Kctd2
		Hist1h2bk		Ankrd34a
		Zpld1		Rnf19b
		Cks2		Rnf207
		Myocd		Trim80
		Rgs19		Cisd3
		Rps16		Jdp2
		Slamf1		H2-Eb1
		Trim71		Ccdc63
		Gata6		Pepd
		Gnb3		Lrrc24
		Lctl		Ly6g6e
		Phf19		Ly6g6f
		Fzd2		G6pc3
		Emp2		Epha1
		Elf4		Dmtn
		Zfp647		Diras1
		Prickle3		Dhx58
		Mtbp		Chst8
		Lgals3		Cend1
		Lrmp		Bnipl
		Kdelr3		Ak1
		Cilp2		BC005624
		Txk		Whrn
		Spag5		Tspan17
		Sp5		Trpm2
		Col6a2		Tesc
		Tap1		Susd4
		Rps29		Sncb
		Fhl2		Slc45a1
		Rcn3		Slc25a25
		Shc1		Sh3glb2
		Cdhr2		Rap1gap
		Dscam		Pkm
		Csf2rb		Panx2
		Htr4		Ap3m2
		Zfp488		Cbx7
		Adamts9		Actrt3
		Akap13		Syt13
		Cartpt		Rab26
		Fat4		Gaa
		Fmnl3		Flt3
		Nckap5		Cx3cl1
		Itpr2		Ache
		Gfpt2		Atp6v1g2
		Dnah1		Azin2
		Adamts14		Camk1g
		Adgrg1		Cdc42ep1
		Asxl1		Tmem250-ps
		BC030867		Tmem108
		Cacna1h		Sh3bgr
		Tcp11		Rnf208
		Tcf7l2		Relt
		Scube1		Prkar1b
		Nynrin		Phospho1
		Cd180		Penk
		Ccdc88c		Peli3
		Ttc28		Paqr7
		Kif24		P2rx5
		Pfkfb1		Oplah
		Slc23a4		Neurl1a
		Zfp618		Nectin4
		Hhipl1		Mroh1
		Nup205		Mid1ip1
		Zfp423		Kif17
		Elfn1		Khk
		Agrn		Gmpr
		Ccnb2		Abhd14b
		Cdc25c		Agtrap
		Cdkn3		Asphd1
		Trerf1		Unc13d
		Tnc		Tor4a
		Nkx2-2		Stap2
		Gpr156		Slc16a11
		Aldh1b1		Plvap
		Vsig10l		Plekhf1
		Tram2		Ndrg4
		Arhgap36		Myadml2os
		Def6		Mpp2
		Lamc1		Gpr176
		Col16a1		Fxyd1
		Klk8		Csrnp1
		Lipg		Scin
		Col4a1		Gpat3
		Col4a2		Stac2
		Cspg4		Wnt3
		Pik3cg		Asb13
		Hlx		Ccndbp1
		Notch3		Rasgef1a
		Hspg2		Gprc5c
		Nespas		Cdh18
		Icam5		Clstn2
		Tecta		D7Ertd443e
		Rp1		Dao
		Chrdl2		Diras2
		Cyp2b19		Fgf1
		Slc13a5		Gfod1
		B3gnt7		Ppargc1b
		Iqgap1		Piwil2
		Itga11		Osbpl1a
		Bmp4		Lgi4
		Tpbg		Klc2
		Fndc1		Kcnj9
		Fam71f2		Kcnj12
		Arhgap30		Kcnab2
		Baiap2l2		Grina
		Sox7		Got1
		Col5a2		Fxyd3
		H19		Flywch1
		Nts		Fam78a
		Nnat		Fam174b
		Nes		Faim2
		Cd248		Eef1a2
		Glis2		Dhx58os
		Fkbp10		Chil1
		Dock6		Cdh15
		Creb3l1		Ccdc92
		Cpxm1		Cbx6
		Col23a1		Casq2
		Ajuba		Atp2a3
		Wdfy4		Alox8
		Ssc5d		Abi3
		Nid2		Zrsr1
		Igfbp4		Zdhhc14
		Col6a3		Zbtb7b
		Cd276		Wscd2
		Bcl6b		Wbp2
		Ttyh3		Syngr1
		Gli2		Spryd3
		Heyl		Sowahb
		Nckap5l		Slc41a3
		Mmp14		Scn1b
		Jag2		Ramp3
		Mir219a-2		Pip4k2c
		Mbd6		Phyhip
		Lrrc32		Pgbd5
		Kif26a		Pfkm
		Mmp25		Pdk2
		Myc		Nomo1
		Col15a1		Ncdn
		Spi1		Napepld
		Plxnd1		Nab2
		Nckap5los		Myh14
		Mfap2		Mroh5
		Tcf7		Mical2
		Spon2		Lgi3
		Thbs3		Klhl34
		Tnfrsf8		Lynx1
		Atf7ip2		Kcng4
		G6pc2		Kcnc3
		AC150274.2		Jup
		Plcz1		Itgb4
		Apbb1ip		Icmt
		Fam124a		Hr
		Hs3st4		Hk1
		Acoxl		Hapln4
		Slfn9		Gria1
		Arg2		Garnl3
		Tgif1		Fitm2
		Agtr1a		Fads6
		Arl6ip6		Ets2
		Ccdc150		Dab2ip
		Dock11		Cyp2d22
		Fam124b		Cds2
		Rnf38		Cds1
		Galnt3		Abcg1
		Pou3f2		Acot11
		Homer2		Adarb1
		Ncapg		Als2
		Lbr		Amigo1
		Il17f		Arhgap23
		Cep128		Arhgap44
		Zfp518b		Arhgef37
		Pappa2		Atg13
		Kcnv1		Camk2a
		Rwdd3		Ttll5
		Col28a1		Ttc7b
		E2f7		Trmt9b
		Kdelr2		Tmbim1
		Plp2		Tex2
		Rassf10		Tbc1d9b
		Tgfb1		Sv2a
		Lamc3		Stxbp1
		Kdm6b		Stx1b
		Haspin		Stim1
		Sema4b		St8sia5
		Ido2		St3gal2
		Spdl1		Snrk
		Col1a1		Slc41a1
		Celsr2		Slc12a5
		Pcdh12		Sgpp2
		Olfml2b		Scn2b
		Ndst4		Rgs8
		Terc		Rasal1
		Tmprss13		Rab11fip5
		Cpa1		Prkcz
		Asb10		Pdxk
		Cdk5r1		Pcnx2
		H60b		Pacsin1
		Mab21l1		Nsf
		Kcne1		Nptx1
		CK137956		Ndrg1
		Ccnf		Nacc2
		Col2a1		Mtcl1
		Eif3f		Mink1
		2022-09-01		Mapk8ip2
		Fdps		AW495222
		Prdm8		Angptl6
		Mcm10		Dcun1d2
		Kdm1a		Prnp
		Lrrc75a		Grin2c
		Kif2c		Lingo3
		Magee2		Lpcat4
		Mmp28		Kcnj11
		Foxo6		Insyn1
		Fbxo16		Ifitm10
		Ephb3		Homer3
		Apc2		Fn3k
		Ccdc88b		Fbxl16
		Cdca5		Efhd2
		Cecr2		Ddx24
		Cenpm		D17Wsu92e
		Tlr12		Cyp27a1
		Tbxa2r		Clstn3
		Stab1		Chn1os3
		Spata13		Cerk
		Shkbp1		Adam11
		Rnf165		Arc
		Popdc3		Arhgef19
		Plk1		Asb8
		Ncapd2		Wfs1
		Naa40		Trim32
		Midn		Trf
		Nkd1		Tmem25
		H1fx		Tmem240
		Drd2		Tmem184b
		Draxin		Tmcc2
		Cul7		Tecpr1
		Crmp1		Svop
		Bcl7a		Slc32a1
		Zswim4		Shank3
		Wdr46		Rtn4rl1
		Vash2		Rnf123
		Sufu		Pqlc2
		Sema6c		Plch2
		Sema4c		Ogdhl
		Scnn1a		Ogdh
		Pycr1		Nat8l
		Pimreg		Miga2
		Pik3cd		Ces1d
		Heg1		Gpld1
		Gab1		Fgfr3
		Fgd1		Dgkg
		Fasn		AC158605.1
		Epb41l5		Arhgef3
		Bub1b		Camk2g
		Tbc1d16		Syt10
		Sema6a		2022-09-08
		Nova2		Pmp22
		Nfix		Patj
		Neurl1b		Irak2
		Myo16		Klk6
		Lrrn4		Lsmem1
		Lrfn1		Kcnab3
		Kdm2b		Itgb5
		Gucy1b2		Inpp5j
		Chst3		Hcn2
		Cdc20		Hapln2
		Cbx2		Gpr61
		Uhrf1		Gpr37
		Tgif2		Galnt6
		Scrt2		Fez2
		Natd1		Acad11
		AU022754		Adcy9
		Bves		Arhgef17
		Troap		Zbtb4
		Smpd3		Wwox
		Sh3bp2		Vamp1
		Pask		Tmem268
		Frmd4b		Specc1
		Rcor2		Slc6a17
		Usp22		Sfxn5
		Zbtb34		Rims3
		Zfp113		Ptprn2
		Actg-ps1		Pnkd
		Mir7028		Pcsk2os2
		AC162035.2		Nwd1
		Pou4f2		Nkx2-9
		Prop1		Nipal3
		Klhl6		Nfe2l1
		Col3a1		Fcer2a
		Cpxm2		Myrip
		Sfrp2		Kank2
		Rbm3-ps		Prlhr
		Gna14		Chst1
		Pheta2		Tmem163
		Bend5		Tgfb3
		Adamtsl3		Slc46a3
		Ankdd1a		Pxn
		Slc35f4		Bpifa5
		Gpc3		Gprc5b
		Crb1		Fam107a
		Prelid2		Cyp4f14
		Fyb		2022-09-04
		C3ar1		Epn2
		Fmo1		Trp53cor1
		Kcnh4		Oprm1
		L3mbtl4		Hgsnat
		Dse		Gpr146
		Fam167a		Gpd1
		Ltb4r1		Fam151a
		Ldhal6b		Ezh1
		Itgax		Etnppl
		Mir3060		Cnnm1
		Itprip		Cdip1
		Hsd11b2		Aldh1a1
		AI506816		Ank
		Vav1		Armh4
		Lrrc75aos2		Atp1a1
		Kif18b		Bcl6
		Iqgap3		Cbln3
		Incenp		Tsc22d3
		Espl1		Trpm8
		Bend4		Teddm2
		Arhgef39		Slc2a3
		Ager		Slc20a2
		Zfp575		Sdf4
		Rxfp3		Pm20d1
		Rps23		Ogfod1
		Psrc1		Map4
		Poc1a		Layn
		Piezo1		Adora1
		Nrm		Adssl1
		Nfatc4		Bhlhe40
		Mki67		Csrp1
		AC132253.6		Susd6
		AC133509.1		Slc6a1
		Plekhf2		Slc2a1
		L3mbtl3		Slc24a3
		Meox2		Sdc4
		Cyp2r1		Rab37
		Zic3		Olfr287
		Fignl1		Mybph
		Fancd2os		Mt1
		Fancb		Aplp2
		Fam111a		Atp1b2
		Exosc9		Sowaha
		Eri2		Sorcs3
		Erh		Mertk
		Ect2		Iqsec3
		Dkkl1		Habp4
		Cep78		Galnt17
		Ccna2		Cyb561d1
		Bub1		Cntnap1
		Bcl11a		Tom1l2
		AC110913.1		Trim3
		Abhd17c		Prag1
		Zfp125		Nlrp10
		Top2a		Lamb3
		Smc4		Kctd21
		Skida1		Kcnh1
		Ska3		Kcnc1
		Sgo2a		Hhatl
		Sgo1		Hdhd2
		Pbk		Grin1
		Mtfr2		Galnt9
		Mir17hg		Cyth1
		Mbnl3		Amhr2
		Kif23		Camk2b
		Lrr1		Syt2
		Lca5		Strc
		Hmmr		Sez6l2
		Flnc		Scn4b
		Eya4		Ret
		Arhgap28		Rap1gap2
		Zfp810		Psd2
		Zwilch		Prrt3
		Shcbp1		Ppip5k1
		Gimap4		Pitpnm3
		Acsm3		Pigz
		Snai2		Nrg2
		Pate2		Mslnl
		Srsf2		Arpin
		Gxylt2		Prdx6
		Lsm5		Dnajc28
		Fam196a		Crtam
		Cyp39a1		Arl4d
		Socs2		Ywhah
		Plod2		Slc34a3
		Chodl		Sgsm1
		Cenpp		Qdpr
		Tshr		Plekhb1
		Mep1a		Nr1d1
		Pcsk5		Tssk5
		Angpt1		Anxa11
		Ddr2		Ltk
		F2r		Hspb8
		Gnai3		Zfp652os
		Peli1		Lncpint
		Dyrk2		Casp1
		Trim59		Tnfaip2
		Sephs1		H2-M3
		Plppr1		Ccdc192
		Phf6		Rasd1
		Plagl1		Tmco4
		Gpc4		Car13
		Spaca1		Cgnl1
		Capn6		Osgin1
		Catsperg1		Fibin
		Tshz2		Mrap
		Plau		Cplx3
		Fnbp1l		Zscan10
		Fancd2		Fam120aos
		Fabp7		Prss23
		Egfl6		Spaar
		Ccdc138		Paqr5
		Ccr1		Pdk4
		Cep57l1		Prss23os
		Ticam2		Exd1
		Srsf6		Dlc1
		Slc23a1		Herc3
		Slc17a8		Dynll2
		Rimklb		Ccdc27
		Rad51ap1		Tmem41b
		Rab32		Adi1
		Pax3		Ahcyl2
		Oip5		Rnf39
		Mapre1		Hist1h2be
		Itga8		Actr3b
		Isoc1		Cstad
		Hmgb1		Rdh14
		Cxadr		Laptm4b
		Tcf12		Hist1h3d
		Slc39a8		N4bp2l1
		Fbxl7		Tspan1
		Sh3rf1		Rnf17
		Ptprv		Rs1
		Lrp8os2		CT025671.1
		Itga2		Airn
		Neo1		Scd3
		Gpr149		Hist1h4h
		Egfr		Fbxo27
		Cenph		Rmdn3
		Cdk6		Prss16
		Cavin4		Mir3074-1
		Vcan		Hist1h2bc
		Zdhhc15		Cycs
		Zfp217		Phospho2
		Zfp326		Cox8b
		Tgfbr1		Abhd6
		Pi4k2b		Tspan5
		Pdgfra		Lrg1
		Pcdh19		Plpp6
		Igf1		Chn1
		Lims1		Chn1os1
		Tgm4		Hist1h1e
		Adora2a		Mtus1
		Igsf3		Lrrc4
		Frem2		Trpc3
		Adamts17		Lrmda
		S1pr3		Tspyl4
		Nhsl1		Hsd17b1
		Vsig2		Tnfaip6
		Mettl27		Fas
		Exo1		Epdr1
		Slc1a4		Car14
		Mov10		Cyp2j9
		Plekhg2		Slc19a2
		Tacc3		Il1r1
		Unc45bos		Ly6a
		Ptpro		Gstm2-ps1
		Ttf2		Gdnf
		Zfp469		Galnt6os
		Actg1		Fosl1
		Akap5		Arl4c
		Ccnd1		Sntg1
		Dbpht2		Olfml1
		Rpl9		Plce1
		Pirt		Itpr3os
		Hcrtr2		Impact
		G3bp1		Fuca2
		Dubr		Flt1
		Dapk1		Dtna
		Acot12		Aspa
		Tnfrsf21		Camk1d
		Spink13		Clic5
		Prdm13		Deptor
		Taar5		Slco1a4
		Depdc1a		Slc23a2
		Mymx		Sema3c
		Ifi203-ps		Rragd
		Hfm1		Rnf144b
		H2-M6-ps		Nalcn
		Fermt1		Lrrk2
		Fbxo5		Atoh7
		Ddx21		Hipk4
		Chek1		Cyb5d2
		Cenpl		Cps1
		Cd24a		Apol8
		AC093020.1		Trim66
		Ankrd44		Pex5l
		Brip1		AC125101.1
		Casp3		Gcnt1
		Ttk		Spag1
		Trip13		n-R5s202
		Tmeff1		Cmpk2
		Sox11		Dnajc27
		Sh3glb1		Pde10a
		Rrm2		Fbxl21
		Nipsnap3b		Tmem88b
		Nfyb		Fbxw11
		Jade3		AC138228.3
		Kif20b		Glul
		Knl1		Endod1
		Npbwr1		Trmt2b
		Hnrnpa0		Sgms1
		Gpsm2		Rcan2
		Ercc6l		Dnajc15
		Elavl2		Ghitm
		Eda2r		Chp1
		Ddias		Calm1
		Ccno		Ucp3
		Bhlhe22		Scrn3
		Antxr2		Plin3
		Zfp422		Mindy4b-ps
		Sox4		AC113458.1
		Sfpq		Abhd3
		Ppp1r14c		Ak4
		Pax6		Zfp109
		Nono		Sspo
		Nanos1		Slc3a1
		Casp2		Rnf182
		Cttnbp2nl		Pptc7
		Pmch		Pcsk1
		Jpt2		Nrsn1
		H3f3aos		Cnga4
		Foxb1		Ccn4
		Cdo1		Ccdc121
		Tnfaip8l3		Crim1
		Stc1		Plch1
		Spink10		Ddo
		Slc35d3		Dand5
		Ptx3		Ccdc28a
		Pnma2		Car2
		Hs3st5		Usp18
		Prkx		Il20rb
		Enox1		Gipc2
		Klhl29		Bcl2l2
		Ints7		Blvra
		Ick		Tmem14a
		Parp11		Mfsd4a
		Myb		Ndp
		Hfe2		Tex48
		Grin2b		AC138768.2
		Gen1		Fstl3
		Gas2l3		Aaed1
		Dsn1		Mpp4
		Dhfr		Gpr12
		Dcx		Edn1
		Cip2a		Slc5a11
		Cenpk		Emb
		Celf2		Tdo2
		Aff3		Rnf227
		Cbx3		Rida
		Txnrd1		Cap2
		E2f3		Tmem50b
		Slc17a6		Marveld2
		Satb1		Map7
		Prss35		Kcnj16
		Prss12		Kcnab3os
		Pou3f3		Grm8
		Plxnc1		Etl4
		Peli2		Dzank1
		Pde7a		Cntnap5b
		Parpbp		Vav3
		Nfib		Slc7a14
		2022-03-01		Scn1a
		Kif15		Samd4
		Lrrc55		Pls1
		Gpihbp1		Pde8a
		Cldn34c1		Olfm4
		Chrna5		Pxylp1
		Zmat4		Fbxw23
		Satb2		Lgals8
		Rhobtb1		Maf
		Rccd1		Myo5c
		Hes7		AW112010
		Isg20l2		Ttbk2
		Mnd1		Lancl3
		Msr1		Kctd9
		Lbh		Hipk3
		Msantd3		Elac1
		Rcc1		Dlg1
		Stn1		AC154707.1
		AC171111.1		Asah2
		Birc5		Wasl
		CT486005.1		Tlr3
		Celf5		Tcaim
		Clspn		Rragb
		Dclk2		Prss41
		Mcm6		Phactr2
		Nsdhl		Naaladl2
		Tsku		Mitf
		AC145590.1		Mkrn2os
		Raet1d		Glt28d2
		Fzd10		Slc4a10
		Cybrd1		Smim14
		Cenpi		Il22
		Ccdc34		Arhgap15
		Bard1		Zfp874b
		Aspm		Gabra2
		Ankrd10		Ppp4r4
		Acp4		Lats2
		Adgra3		Igip
		Zic4		Gls
		Zbtb12		Fbxl5
		Tpx2		Dynlt3
		Rnd3		Dcaf12l1
		Rab39		Cept1
		Ptn		Abi3bp
		Pabpc4		Acvr1c
		Melk		Ublcp1
		Kif14		Tmem135
		Kif4		Syt1
		Lmnb1		Sucla2
		Hnrnpf		Stx3
		Hnrnpab		Spryd7
		Hnrnpa2b1		Sgpp1
		Gjc1		Ogfrl1
		Dmc1		Nrip3
		Dbf4		Mctp1
		Abracl		Kcnip4
		Zfp57		Kat2b
		St6galnac5		Inpp4b
		Sfrp1		Negr1
		Rcn1		Nr1d2
		Phykpl		Nxt2
		Pdzrn3		Olfm3
		Pclaf		Hipk1
		Npl		Oxr1
		Nasp		Gnai1
		Nanos2		Glrb
		Ska1		Fundc1
		Kctd18		Fgf14
		Has2		D3Ertd751e
		Grip1		Cyld
		Gpr161		Crbn
		Frmd4a		Cacnb4
		Fblim1		Asph
		Eml4		Zfp612
		Ebf3		Zfyve9
		Dna2		Ttc39b
		Depdc1b		Trim37
		Cks1b		Tmem30a
		Brca1		Synj2bp
		Bora		Sycp3
		Adgrl2		Svip
		Arhgap11a		Slc6a20b
		Vxn		Slc12a6
		Vangl2		Sec62
		Tenm3		Sacm1l
		St8sia2		Rock2
		Slc5a7		Rnf13
		Sh3kbp1		Rmnd5a
		Scn3b		Rif1
		Scn3a		Ric3
		Scml2		Rabgap1l
		Pou4f1		Pls3
		Mms22l		Pcmtd1
		Lmo3		Mosmo
		Meis1		Bcap29
		Mthfd2l		Zfp931
		Myo1b		Ube2q2
		H2-M5		Adgrf2
		Dpysl3		Peak1os
		Dmrta1		Acer2
		Dcc		Nmnat3
		Cklf		Hrasls
		Cd1d1		Lmbrd2
		Adamts6		Olfr455
		Zfp558		Scn7a
		Tspan6		Ston2
		Tlr6		AC125059.4
		Smc2		Ablim3
		Smarcc1		Fam178b
		Slc30a10		Sohlh1
		Rxfp1		Dhrs11
		Rap2b		Clec2l
		Pspc1		Fcor
		Prr11		Mrln
		Prkar2b		Col20a1
		Magel2		Hkdc1
		Sinhcaf		Il4ra
		Miat		Gal3st3
		Gpr26		Ebp
		Gabra5		Slc35c1
		Bend3		Tmprss2
		Bank1		Tunar
		Xrcc3		BB365896
		Tpsg1		Cadps2
		Shisa7		Gjc2
		Rtkn2		Fa2h
		Rassf4		Erbb3
		Hcn4		Cadm3
		Ptprf		Cldn11
		Sertm1		Tmem125
		Stag3		Slc45a3
		Tk1		Mag
		Tmem44		Adamts4
		Col4a5		Zfyve28
		Casp6		Pllp
		Chek2		Hdc
		Tmem154		Il16
		Ppic		Hrh3
		Ostf1		Cacna1g
		Hddc2		Rps6ka1
		Btg3		Lpin3
		Sox3		Lmo1
		Med30		Espn
		Cd40		Kcnip3
		Csrp2		Kcnip1
		Dmrtb1		Nipal4
		Egfl7		Sema4d
		Rac3		Mpp3
		Gdpd2		Ninj2
		P2rx2		Stac
		Nsmce1		Tuba8
		Npm3		Cbr2
		Mfng		Gapdh-ps14
		Maged2		Trim38
		Rps27l		Dlx4os
		Tle1		Cav3
		Ugt1a7c		Colq
		Cldn23		Tg
		Ccl9		Acot5
		Aadat		Lnp1
		Xkr7		Sgca
		Adgrg3		Cdh22
		Zfp608		Lancl1
		Pus7l		Dgkd
		Atp8b4		Cnp
		Slc38a5		Afap1l2
		Slc27a6		Tnni1
		Rlbp1		Pdlim2
		Lhcgr		Mog
		Pou2af1		Mbp
		Siah1b		Cdkn2b
		Klrg1		Slc8a2
		Fam129a		Mal
		Riiad1		Sparc
		Pald1		Opalin
		Pdia5		Lrrtm3
		Cntn5		Tmem35a
		Vstm5		Ccdc154
		Sstr1		Cd81
		Pxdn		Serpinb2
		Ccl3		Asic2
		Dennd2c		Kifc2
		Marcks		Mdfi
		Magohb		Ggt1
		Iqgap2		Map6d1
		Hdac2		Mindy1
		Fgf5		Hbegf
		Diaph3		Slc1a6
		Cep112		Spata20
		Apool		Phactr3
		Ccnd2		Itgad
		Tpm4		Zfp703
		Tgfb2		Elovl7
		Tfdp1		Necab1
		Srbd1		CT009580.1
		Ska2		Adrb2
		Rnaseh2b		Kmo
		Rbbp8		Nt5e
		Pole2		Vat1l
		Otop1		Celf4
		Nhlh2		Pcdhb8
		Neurod4		Tmeff2
		Dynlt1-ps1		Eps8
		Armc10		Nhsl2
		E2f8		Add3
		Rbmx		Tmod1
		Kif20a		Map3k5
		Zbed4		Man1a
		Glis1		Lrrtm2
		Epcam		Idh3a
		Dlgap5		Gpm6a
		Cdkn2c		Tspan2
		Aurka		Grap2
		Ube2c		Art3
		Ticrr		Chad
		Stc2		Tmem117
		Rpl10a-ps1		St6galnac3
		Mex3a		Usp46
		Uchl1os		Rflnb
		Xpnpep2		Frmd8os
		Eef1a1		Aloxe3
		Kcnq5		Scel
		Eif4e3		Ackr1
		Snx7		Sla
		Ptbp1		Lgr5
		Cenpn		Cacna2d3
		Ash2l		Syt9
		Basp1		Zdhhc9
		Vopp1		Phpt1
		Rrm1		Fgf7
		Lockd		Impg2
		Nup37		Uts2b
		Clrn1		Htr1d
		Vrk2		Olfr315
		Spc24		Btbd16
		Smarce1		Pcdhb13
		Pwp1		Hapln1
		Hist1h4b		Cd38
		Rgs13		Pla2g4a
		CR974462.6		Elovl2
		Chst7		Adra2b
		Mlnr-ps		Purb
		Arhgdig		Lpar1
		Celsr1		Adam22
		Cyth4		Ugt8a
		Fhl3		Sytl2
		Hic2		Apln
		Hmgb3		Cstl1
		Kcne1l		Me3
		Abl1		Gsn
		Cdh4		Mcam
		Cmip		Rab7b
		Cpne5		Cldn14
		Stum		Sgk2
		Hs6st3		Omp
		Kcnj6		Sp7
		Kcp		Susd5
		Inka1		Ajm1
		Fscn1		Fam131b
		Dennd2a		A1cf
		Cpne6		Nell2
		Ckap4		Muc3a
		Vasp		Fstl4
		Tcf3		Slit3
		Tcf15		Btbd3
		Nacad		Lgr6
		Matn4		Galnt15
		Megf6		Syn2
		Mks1		Plp1
		Il3ra		Tcp11l2
		Bcl2l12		Nos1
		Syk		Pth2r
		Scarb1		Cpox
		Pmf1		Mmp20
		Amn		Sspn
		Cers3		Car9
		Unc45b		Mybpc3
		Zfp92		Ntm
		Crym		Nptxr
		Id3		Slc7a8
		Hic1		Igsf9b
		Ephb4		Pkp2
		Eci2		Ptpre
		Dusp2		Sel1l3
		Crip2		Tph2
		Col22a1		Trim62
		AC134591.1		Dcstamp
		Adamtsl2		Cacna1d
		Tmem54		Plppr4
		Slc43a1		Pcdhb10
		Rasl10a		Sftpc
		Psme1		Olfr523
		Pf4		Tmem267
		Mmp2		Arxes2
		Lgals7		BX649560.1
		Gja4		Il31ra
		Col26a1		Map3k7cl
		C1qtnf6		Apoa2
		Vgf		Rgs7
		Tead3		Kctd12
		Mmp15		Egr4
		Twist2		Fam20a
		Unc93b1		Mybpc1
		Galnt14		Degs1
		Bach2os		Pdgfd
		Vstm2b		Kctd8
		Mafb		BC049715
		Foxf2		Cnst
		Epha10		Depp1
		Ecel1		Dio2
		Slc6a11		Prom1
		Ung		Smco3
		Zcchc12		Thegl
		Pth1r		Atp2b4
		Olig2		Itgb3
		Oxct2b		Hsbp1l1
		Gpx6		Lao1
		Htr6		Arrb1
		Slc16a3		Klf9
		Vwce		Ust
		Duox2		Omg
		Atp4a		Dgkh
		Bid		Cntnap2
		Cpne7		Il1rap
		Rgs12		Lgr4
		Ppp2r2b		Rora
		Ncaph		Gpd2
		Mycl		Mob3b
		Lyl1		Tmem229a
		Haus7		Gabrg2
		E2f1		Opcml
		Dok2		Zfp108
		Ctxn1		Zfp719
		Cdca3		Nat1
		Bzw2		Grid2
		Arhgap25		Wipf3
		Zfp184		Cdh12
		Tmsb10		Olfr1564
		2022-09-09		Bcl2l15
		Rps4x		Ell2
		Pantr1		Zfp750
		Ngfr		Cldn12
		Mcm3		Pcdhb18
		Ezr		Nap1l3
		Ak2		Mbnl2
		C4a		Syt4
		Dctd		Nrk
		Nhp2		Sri
		H2afv		Paqr9
		Galk1		Prkce
		C1qtnf2		Rab3c
		Vps37d		Thrb
		Trim27		Tshb
		Sec61b		Acy3
		Rpl34		Aqp9
		Rpl32		Cpm
		Rack1		B3galt5
		Dppa5a		Epha6
		Zfp503		Lin7a
		Ap1m2		Arhgap6
		Arid3b		Atp13a4
		Fabp5		Gja1
		Efcab11		Pcdhb14
		Acot1		Proser2
		Tesmin		G6pc
		Limd1		Gsto2
		Chsy3		Pcdhb9
		Arsj		Smim3
		Baz1a		Tmc7
		Ube2i		Egr1
		Lpar2		Lix1
		Gmip		Impg1
		Fras1		AC148004.1
		Cdca2		Extl1
		Syce2		Atg9a
		Svopl		Clip3
		Rxrg		Spock2
		Fgd2		Kcnk12
		Irx5		Camk4
		Wnt7b		Ermn
		Fgf3		Slc19a3
		Neurod6		Ablim1
		Lpcat1		Acsm5
		Idh1		Cacna1i
		Eif4a1		Erv3
		Slc35f2		Inf2
		Syt16		Emilin2
		Rexo5		Kcna1
		Armcx6		Plekhh1
		Sox14		Padi2
		H3f3a-ps1		Prom2
		Dmbx1		Rasd2
		Tm4sf5		Schip1
		Krt72		Nos1ap
		Krt73		Slc17a7
		Mir6944		Tspan11
		Rps2		Atp2b3
		Pgm5		Cdyl2
		Tmsb4x		Arhgef10
		Cdca7		Nt5c1a
		Insm1		Lingo4
		Olig3		Stat5a
		Cdca4		Fech
		Cdca8		Kcnmb1
		Klk1		Plcxd3
		Lurap1l		AC102132.1
		Pa2g4		Prr5l
		Tdg		Trpc5
		AL592112.1		Slc6a5
		Gamt		Col19a1
		Fam83d		Pcdhb15
		Epop		Tmem174
		Adra2c		Cmya5
		Zfp580		Fat1
		Neurog2		Gas7
		Map4k1		Adcy1
		Fads2		Atp2b2
		Dusp4		Slc43a2
		Tmem158		Sec14l5
		Ubald2		Klf13
		Uncx		Cyp2j12
		Gja3		Fat2
		C5ar1		Rd3l
		Carhsp1		Tmem63c
		St6gal1		Arhgap20os
		Rad51b		Atp8a1
		Lor		Nkain2
		Lsm3		Klhl11
		Suv39h1		Dnajc6
		Ube2s		Stxbp5l
		Crabp1		Gabrb2
		Celf6		Paqr8
		Dlk2		Sv2b
		Rtn4rl2		AC117816.1
		Prr7		Ptprb
		Pgls		Slc1a2
		Ebf4		B4galt6
		Alk		Mindy2
		Sstr2		Ahcyl1
		P4ha3		Etv1
		Marcksl1		Calb1
		Kcnh6		Serinc1
		Nde1		Retreg1
		Disc1		Ppp3r1
		AC132455.1		Mpv17l
		Zfp41		Rasgrp1
		Slc39a11		Gpr155
		Sh3bp4		Klhl4
		Rnd2		Arap2
		Actl6a		Grin2a
		Alyref		Dock4
		Ddx43		Arhgap20
		Dnph1		Atl2
		Gins1		Trim2
		Panx1		Smim13
		Mis18a		Rnf152
		Lrrc7		Pclo
		Hmgn2		Mfap3l
		Hepacam2		Pde4b
		Eldr		Agtpbp1
		Dscc1		Arfgef3
		Cdk1		Dixdc1
		Adgre1		Plcxd2
		Vegfc		Pja2
		Rfc3		Kantr
		Poc1b		Mid2
		Nipal1		Tcaf3
		Kcnj15		Olfr456
		Rps19		Cdh19
		Slc1a5		Lnpep
		Dnmt3b		Kdm7a
		Fbl		Mtmr7
		Mdm1		Gpm6b
		Cenpa		Gclm
		Crtac1		Galnt7
		Slc27a3		Col4a3bp
		Odc1		Chpt1
		Npnt		Cdkl5
		Knstrn		Xiap
		Hmgn1		Zfp712
		Nsg2		Tmx4
		Pdlim3		Snx13
		Dynlt1f		Slc9a6
		Cdk2		Rec114
		Tes		Ptar1
		Tcaf2		Psd3
		Spidr		Epb41l4b
		Shisa2		Il1rapl1
		Rpa3		Papss2
		Racgap1		Prex2
		Plin1		Pura
		Ankle1		Slc4a4
		Bcl7c		Pcdh9
		E2f2		Pkib
		Polr1e		Ppp3ca
		Pgm2		Slc35a5
		Gsx1		Aff1
		Hmgb2		Arhgap26
		Nme4		Cacnb2
		Aspdh		Clec16a
		Has2os		Clmn
		Mycn		Cyfip2
		Mir9-3hg		Rnf6
		Lrrtm1		Pkp4
		Blnk		Gramd1b
		Pxdc1		Hlcs
		Pim1		Kcna2
		Pcdh8		Ldb3
		Hist1h2bj		Lmo7
		Optc		Luzp1
		Serpinh1		Myo15
		Stk32b		Il17re
		Tert		Exph5
		Tyms		Dnm1
		Cd1d2		Ctnna3
		Hist1h3a		Atp1a2
		Hist1h2ag		Alpk2
		Engase		Ank1
		BC001981		Zbtb7a
		Dcakd		Vwde
		Efna2		Ush1g
		Shb		Syt7
		Mex3d		Syne1
		Mcm5		Sptb
		Klhl35		Speg
		Gnb2		Sorl1
		Fgfr4		Plekhm3
		Banf1		Pcsk6
		Ddah2		Cplx2
		Snx22		Clip1
		Rps26		AC079441.1
		Rpl27		Arfgef2
		Reep4		Bco2
		Ppib		Ccdc24
		Plcd1		Trabd2b
		Ier5l		Des
		Hes5		Pde4a
		Fxyd6		Iqsec1
		Fxyd2		Kcnj10
		Fam171a2		Map7d2
		Ddx39		Mamld1
		Cited1		Lgi2
		AC161166.1		Man2a2
		Apex1		Jade2
		Aprt		Itpr3
		Tssk4		Iqsec2
		Tax1bp3		Myo1d
		Rps7		Daam2
		Prim2		Cntn6
		Ppp1r14b		Adamtsl4
		Plxnb2		Vwa7
		Jpt1		Tmem63a
		Masp1		Tiam1
		Kti12		Svep1
		Lag3		Spink8
		Kpna2		Rapgef4os2
		Lsm2		Rab3gap1
		Ly6h		Pla2g2f
		Ier5		Pcsk2
		Hes6		Dock9
		Eva1b		Cdon
[truncated: 735 more rows]

## Sheet: Figure 2
H3K27me3 Up		H3K27me3 Down (Fast)		H3K27me3 Down (Slow)
Rnf157		Pipox		Ralb
Tcstv1		Hnrnpll		Cyrib
Grip1		Plxdc2		Mpp2
Fscn2		Bend6		Gm2027
Bok		Unc5b		Etv5
Mycn		Slc6a7		Acvr1c
Sox11		Syt2		Gas2l1
Nln		Cacna1e		Sh2b3
Clip4		Eno2		Dock9
Zeb2		Mras		Dnajc6
Plch1		Nefh		Kdm2b
Cdk6		Arhgef15		Ttyh1
Mir99ahg		Hr		Adarb1
Gli2		Panx2		Rcan1
Osbpl5		Jakmip1		H19
Grip1		Plk2		Slc25a42
Crybg3		Fhad1		1700016K19Rik
Gas1		Adamts2		Otulinl
Pcsk5		Gm14207		Kcnab3
Stc1		Celf5		Itgb5
Gm12408		Rph3a		Ksr1
Togaram2		Fxyd1		Oplah
Cd24a		Kcnj9		Nr0b2
Myo16		Camkk1		Fstl3
Zeb2		Lgr5		Wscd1
Vav2		Tenm2		Ptpn21
Ier5l		Gm15179		Pik3cd
Prickle2		Wnk2		Ctdsp1
Akr1e1		L3mbtl1		Fmnl1
Nomo1		Fbll1		Ahr
Cttnbp2		Dst		Chn2
5830418P13Rik		Frat1		Plxna1
Trib2		S1pr5		Myo1c
Basp1		Ddx25		Vav1
1110059E24Rik		Etv5		Mir5135
Obscn		Sez6		Gpr176
Myo16		Atp1a3		Spock1
Ccdc121		Ablim1		Mpig6b
Lrig3		Pcx		Arvcf
Nln		Mtus2		Fgf12
Lpin2		Gabbr2		Matk
Rps4l		Napsa		Syt7
Vmn2r-ps54		Lrrtm3		Rnf144b
Gpr31b		Dpf3		Lyn
Arhgap32		Kcna1		Gmpr
Lifr		Aopep		Phospho1
Arhgap28		Ccdc136		1700125G02Rik
Macf1		Phyhip		Dmtn
Togaram2		Ccdc63		Epha8
Vangl1		Amer3		Iglon5
H3c11		Cerkl		Hsd17b1
H3c1		Mab21l2		Sipa1l1
H3c10		Cyp46a1		Ppp1r1b
H3c8		Hs3st1		Klhl21
Nt5dc2		Lhfp		Map7
H3c2		Slc35a3		Cacna2d2
Enpep		Atp2b3		Cbx7
Cfap61		Klhl33		Wnt7a
Lifr		Plekhf1		Bcl6b
Grik4		Flywch2		6530402F18Rik
Pdzrn4		Tmem158		Des
Tk1		Lrfn3		Mfap2
Cfap61		Celf5		Stk10
Gpc6		Frmd5		Crb3
Vim		Arhgap24		Tesc
Cdc42ep4		Abcg1		Rara
Rab34		Epha10		Mir1966
Zfp462		Atoh7		Fbrsl1
Adgrg1		Rasgef1c		Nrg3
Stc1		Rtn4r		Mtus2
Zfp217		Asic2		Atcayos
Pou3f3		Ciart		Slit3
E2f2		Mir124a-1hg		Afap1l2
Rbms3		Slc17a7		Syngr3
Qrich2		Slc35f3		Mir124a-3
H3c3		Ufc1		Cyp1a1
Adamtsl1		Ptpn18		Usp2
Prlh		Tanc2		Agbl2
Abr		Optc		Srrm3
Sntg2		Prss33		Orai3
Fign		Tcerg1l		Dnaja4
Rassf3		Gm15569		Sfmbt1
Nln		Cystm1		Ppp1r13l
Tmeff1		Dact1		Fos
Vav2		Gm5148		Kcnk4
Erbin		Srcin1		Acta1
Homer3		Atp11a		Scn1b
Fnbp1l		2310030G06Rik		Agap3
Pde5a		Creld1		Zfp703
Adamts1		Spock2		Ankrd13b
Ier5l		Pipox		Megf8
Myo16		Prkce		Hexim1
Xkr5		Ctif		Plxna1
Elovl2		Cdc42ep3		Car7
St6gal1		Pld5		Lrrc24
Whrn		Atxn1		Abcb9
Fabp5		Tmem117		Scx
Lrrc8c		Nars		Myrip
Rbms3		Cyb561		Rap1gap
Gypc		Ephx4		Mylip
Tox		Aatf		Pxmp2
Zeb2		Gpr158		Epha1
Cachd1		Lpin3		Iqsec1
Prickle2		Cryl1		Pdxk
Kit		Cnp		Eno2
4930432O09Rik		Fndc3b		Myh14
Lrrk1		Cysrt1		Trmt9b
H2ac6		Nr4a1		Ckb
Vmn1r125		Trim67		Cdh22
Slpi		Col16a1		Kcnc1
Gas2		Pde4b		Mpzl3
H2bc15		Fam135b		Plec
H2bc7		Cdkl5		Tcp11l2
Rnf157		Nmnat2		Zdhhc18
Uhrf1		Pkd1		A230051N06Rik
H2ac15		Dlg2		Nt5c2
H2ac13		Sez6		Flt3l
H2bc14		Sema6b		Trpc1
H2ac22		Slc6a7		Fmnl1
H2ac12		Hivep3		Nrn1
H2ac11		Disp3		Klhdc8a
H2ac10		Trhde		Nrip3
H2ac7		Nmnat2		Cnn2
H2ac8		Zdhhc22		Pdlim2
Plscr1		Ppp2r2c		Ntf5
Tnfrsf22		Map3k5		Dhh
Ccdc141		Mfsd13a		Galnt17
Atp10d		Slco3a1		Hmcn2
Phactr2		Syt6		Kcnk4
Pdzrn4		Cadm4		Rap1gap
Gabrg1		Rgs8		Uncx
Timp3		Nrxn2		Myo1d
Plekhg1		Tnr		Fmnl1
Arhgap28		Lats2		Mir7240
6720489N17Rik		Smarca2		Fam78b
Chdh		Gstt2		Racgap1
Homer3		Gnas		Tspan4
Aspm		Jdp2		Prrt1
Ccdc13		Ciz1		Bcl6
H2bc9		Dusp8		Ampd3
Adarb2		Sel1l3		Ablim2
Dchs1		Adap1		9930012K11Rik
Ptprz1		Kif26b		Ptchd1
Golt1a		Prom2		Arhgef15
Adamts12		Ank2		Gm20517
Baz1a		Kif26b		Nr4a1
Bmpr1b		Rasgef1a		Rhbdf1
Elapor1		Adcy1		Zbtb7a
H2bc23		Csmd2		Otud7a
H2bc23		Zfp541		Pitpnm3
H3c6		Lck		A930004D18Rik
H3c4		Marveld2		Prox1
Gng5		Rbfox3		Bahd1
Marcksl1		Ssh3		Eml2
B3gnt5		Mypop		Mir7055
Clic4		Rapgefl1		Slc9a3r1
Ccdc141		Hivep3		Nab2
H2ac4		Mtmr11		Mir129-2
Eln		Arntl		Kcnip3
Gm833		Kcnh1		Egr3
Tjp1		Mospd4		Akain1
Vmn2r22		Peli3		Egr4
Egfr		Lrp8		Jsrp1
Asb4		Dusp7		Oxt
Tnfrsf1a		Catsperd		Foxh1
Tsku		Ank2		Plec
Mup2		Slc17a7		Ankrd34a
Wdr95		Rgl1		Cldn6
Mlh1		Il17d		Dgkz
Rbms3		Jazf1		Cdon
Gm4793		Etv5		Rgcc
Carhsp1		Lrp8		Srrm3
Mfsd2a		Gfod1		Shank1
Tcn2		Cacnb4		Grb7
Abtb2		Slc35c1		Syt2
Prtg		Larp1b		Gm11762
Krt31		Dnm3		Npas2
Proca1		Unc5b		Kcnk12
Klk1b26		Cbarp		Slc16a11
Cachd1		Abca17		Mmp23
Rimklb		Pcdh1		Ajm1
Rab17		Arhgap26		Gpr25
Vmn1r123		Epb41		Pitpnm1
Vmn1r160		Dlgap4		Tiam1
Phldb1		Vgf		R3hdm4
Gm4793		Leng9		Kcnc4
Nav1		Lin7b		Esam
Gramd3		Tnrc6c		Gadd45b
Hapln1		Cdyl		Tead4
Rcn3		Spry1		Insyn1
St6gal1		Zbtb7b		Hcn2
Ccdc141		Atoh8		Ccdc106
Vwa3b		Cd83		Ubtd1
Cyyr1		Egr1		Mir212
Bcat1		Eif2b5		Ppp1r1b
Vwa5b1		Cacna1a		Synj2
Nptx2		Prkcg		Gas6
Atrnl1		Lingo1		Trnp1
Gnb4		Kifc2		Tspan9
Zfp217		Polg		Flt3
Adcy7		Nptxr		P2rx5
Mir6387		Sytl2		Slc2a1
Cox8c		Pacsin3		Rab37
Optn		Taok3		Syt6
St6gal1		Ciz1		Nr4a2
Luzp2		Junb		Dscaml1
Tshz2		Rgs8		Gucy2e
Chsy1		Meg3		Mir124a-3
Padi1		Efna1		Isyna1
Prickle2		Rora		Tsks
Gsg1		Pknox2		Coro2a
Mrgpre		Meg3		Cx3cl1
9330111N05Rik		Ccdc92		Slc41a2
A1cf		Nebl		Sv2c
Slc26a3		Cux1		Pou2f2
4933402J15Rik		Ttc34		Map3k9
Spns2		Mir7236		Abca1
St6gal1		Nhlrc1		Hes7
Gfra2		Pdpk1		Cacna1c
Disp1		Rhbdf2		Vgll2
Mdga2		Rpgrip1		Rhpn2
Enc1		Zbtb46		Hbegf
Plekhg2		Anks1b		Pdx1
Krt5		Srrm2		Itgb3
Qsox1		Abca5		Cacna2d1
Rgs12		Mmp24		9130019P16Rik
Aplnr		Elmod1		Mir193b
Lbh		Bcl2		Ptpn3
Slc34a2		Tspoap1		Eomes
Zswim6		Fbxo43		Slc8a3
Gm10556		Ntm		Gm15179
Cxcr4		Smad9		Rasd2
Mrgpre		Rragd		Strip2
Celf2		Stard10		6430548M08Rik
Grip2		Spock2		Tnfrsf11a
Tekt4		Ppm1l		Cacnb3
Cd163l1		Synpo2l		D930007P13Rik
Tnks1bp1		Gnal		Kcns1
6030498E09Rik		Eml6		Shank3
Nme9		Sema6b		Pstpip2
Trmt11		Kcnip4		Ppm1n
Ttc39c		Ppp2r2c		Vwa5b2
Mpdz		Abcc8		Runx1
Mettl5		Nrbp2		Hdnr
Mpdz		Ppargc1b		Sec14l2
Bicra		Malt1		Lad1
Nedd4l		Gsto1		Irx4
Snord104		Otud1		Tnfaip2
Cnpy1		Golga7b		Camk2a
Crebzf		Lrrc36		Crybg2
Ppp2cb		Rac3		Prdm12
Slc25a37		Sv2c		Sfmbt2
Tshz1		Xkr6		Six6
Kctd15		Tanc1		Cdon
Btbd1		2210416O15Rik		Pheta2
Hdgfl3		Ccdc92b		Eya2
Pmepa1		Ccdc183		Tmem132e
Ntng1		Bdnf		Amn
Smim38		Epb41l3		Zfp503
		Pipox		Wnt11
		Syt12		Erfl
		Clstn1		Etv4
		Rhpn2		Mir193a
		Trim2		Lin28a
		Chd3		Gp5
		Grin1		Slc6a5
		Hivep3		Tacstd2
		Vgll4		Gm49890
		Eomes		Mir196a-2
		Ccr9		Ptp4a3
		Atp1b1		2410017I17Rik
		Nanos1		Trank1
		Bhlhe40		Pkdrej
		Mical3		Gm16136
		Grin2a		Pkp1
		Cbarp		Hoxa9
		Bmi1		Aqp5
		Jph3		Lhx2
		Pcsk2os1		Hoxc12
		Gm15417		Rasal3
		Fosl2		Gm12992
		Pura		Six3os1
		Rgmb		Esrrb
		Shkbp1		Itpr3
		Gls2		Ppl
		Galnt9		Sfn
		Tmem130		Cd70
		Pianp		Arhgef39
		Shank1		Kcnk3
		Fabp3		D930020B18Rik
		Gm38426		Galr1
		Lmo1		Nfatc2
		Pop5		Hrk
		Gm15825		Wwox
		Gm53		Arhgef3
		C1ql2		Rnd1
		Cyp26c1		Rnf39
		Adamtsl5		Tmem163
		Hoxc8		S1pr5
		Pax1		Rcc2
		Gm14424		Dab1
		Kcnk9		Epha2
		Fam163a		Adm
		Gata2		Mir378a
		Hoxb1		Kcna2
		Scn4b		Ush1g
		Rasl10a		Rhod
		Egr3		Galr3
		Bdnf		Tmem191c
		Hoxb4		Cdh22
		She		Arid3c
		Prkcd		Kcnh3
		Hoxd10		Fosb
		Dmrta2		Mir1900
		Shroom1		Dgkg
		Ggn		Extl1
		Gm45928		Tub
		Espn		C77080
		Bcl6b		Gm10575
		Wnt3a		Rasal1
		Foxd4		Hcn4
		Hapln4		Hrk
		Stac2		Zmynd10
		T		Tmem108
		Cdx1		Dpp10
		Foxd4		Cdk18
		Scarf2		Odf3b
		1190005I06Rik		Golga7b
		Llgl2		Grin2c
		Mir129b		Slc12a5
		Lhx3		Pcsk1n
		Cds1		Snhg11
		Kctd1		Col8a2
		Meis2		Lmo1
		9530082P21Rik		Tmc5
		Kcnq4		Fgf14
		Mmp11		Dnm1
		Hs3st3b1		1700124L16Rik
		Fev		Col13a1
		Pld2		Cntfr
		Tbx1		Gm28626
		Nkx2-9		Rln3
		Smug1		Caln1
		H2-K2		Hotairm2
		Comp		Pnmt
		Gm8909		Nrn1
		Cacna2d2		Pip5kl1
		Plut		Jakmip1
		Hoxb13		Nrg2
		Hoxc13		Mab21l2
		Hoxd12		Slc6a17
		Hoxb8		Ahdc1
		Tbx3os2		Vamp8
		Gm22109		Rspo3
		Gsc		Gm11729
		Wiz		Tgfa
		Pou4f2		Erbb3
		Pax7		Pitx3
		Gm15050		Rims4
		Foxl1		Bdnf
		Crlf1		Sowahb
		B230323A14Rik		Jak3
		Hoxb6		Fam83h
		Anxa11		Jakmip1
		Rap1gap2		Snai3
		Hapln2		Helt
		Mafb		Cyp27b1
		Hsf4		Gm15631
		Adra2c		Tdrp
		Foxe3		Cadm1
		Trim71		Pax1
		Perp		Lrp4
		9530059O14Rik		Gm25212
		Stum		Unc5a
		Cgnl1		Uncx
		Fosl1		Nbeal2
		Tradd		Pdk1
		Hand1		Mcf2l
		Lmx1a		Tbc1d8
		Barhl2		Bcr
		Foxo1		Arhgdig
		Eras		Pax6
		Hoxb9		Pcsk6
		Foxb2		Atcay
		Onecut3		Tiam1
		Vax1		Aph1c
		Dlx1as		Mpzl3
		Hoxb3		Akain1
		Fezf2		Creld1
		Prdm13		Zfp607a
		Tfap2a		Atp6v1b1
		Klf2		Adcy8
		Pax9		Mgat4a
		Casz1		Nt5c1a
		Hoxd3		Slc9a3r2
		Hoxa7		Mettl24
		Tbx5		Tlcd4
		Zfp385b		Tdrd7
		Hand2os1		Sorl1
		Sall4		Fgf18
		Helt		Hmcn2
		Sox14		Shcbp1l
		Aldh1l2		Pigz
		Runx1		Bmf
		5730596B20Rik		Otx2
		Hpdl		Arhgap27
		Fgf18		Pparg
		H2-D1		Vldlr
		Trim7		Bsx
		Efhd2		Npb
		Hmx2		Bspry
		Sox14		Kcnt1
		Mab21l1		Mxra8
		Rapgef2		Plekhf1
		Apln		Gpsm3
		Cacna2d3		A330040F15Rik
		Epn3		Dnali1
		Dmtn		Mir7009
		Per3		Cst6
		Fezf2		Sgms2
		Cbln1		Mir1895
		Ptprn		Alkbh3os1
		Dnah11		Nbeal2
		St8sia5		Fzd4
		Kcnj12		Proser2
		Pip5k1b		Dlc1
		Uncx		Foxp1
		Hoxa3		Osr1
		Map3k21		Chst11
		Trim72		Prr16
		Cacna1a		Grb10
		Abi3		Spint2
		M5C1000I18Rik		Acbd4
		Rgs8		Ssbp4
		Fa2h		Rarg
		Mon1a		Ahdc1
		Agap2		Rras
		Rtn4rl1		Phf13
		Car4		Radil
		Gprc5c		Hps6
		Crhr1		Afap1l1
		Grm4		Camkk2
		Cdk5r2		Denn2b
		Scrt1		Gltpd2
		C1qtnf4		Farp1
		Mmp9		Tgfbr3
		Rap1gap2		Megf11
		Dock9		Brsk2
		Grin1os		Fam155a
		Ank1		Micall1
		Tuba4a		Slc6a6
		Bhlhe40		Cnnm2
		Speg		Iqsec3
		Tunar		Helz
		Fstl4		Adamts18
		Cspg5		Slc16a9
		Rps6ka1		Zbtb8b
		Abhd3		Spon1
		Vwa1		Camk2n1
		Tmem151a		Tlcd4
		Ckmt1		Sorl1
		Cacna1c		Pde10a
		Mapt		Snta1
		Sptbn4		Ralyl
		Kazn		Efhd2
		Clip1		Apoa1
		Il10ra		Sned1
		Neurod2		Mical3
		Ctnnd2		Gm15517
		Gpbp1		Phldb1
		Rras2		Utrn
		Taok3		Tmem243
		Kcna1		Fez2
		Faah		Stat6
		Atoh8		Susd4
		Ifi30		Dtx4
		Jakmip3		Ptp4a3
		Igsf9b		Asic4
		Phactr3		Gnal
		Cpne9		Epor
		Ephb1		Hmx1
		Dbndd2		Tmem132e
		Ntrk3		Nrg3
		AI854703		Spry4
		Sptbn4		Hoxa1
		1700020L24Rik		Mpzl3
		Gabrd		Abcc4
		Slc26a8		Hoxa5
		Gjb1		Uap1l1
		F11r		Sgms2
		Cfc1		Efemp2
		Hspa2		Gipc2
		Fndc5		Ccdc116
		Car10		Kcna1
		Cacna1g		Nfil3
		Car11		Nr3c2
		Vgll4		Mllt6
		Nrp2		Itpkb
		D030025P21Rik		Rarg
		Pak1		Foxo1
		Zfp385a		Rara
		Nrros		Pdgfb
		Lrrtm1		Chadl
		Cep170b		Ccdc184
		Nr4a2		Mt1
		Lrrc75b		Speg
		Bhlhe41		4933428G20Rik
		Fbll1		Hes5
		Ppp3cc		Arhgap45
		Zfyve28		Creb5
		Paqr9		Kcnn2
		A730098A19Rik		Ltk
		Tifa		Tmbim1
		Ache		Hoxb3
		Shfl		Six3os1
		Kirrel3		2210408F21Rik
		Lamc2		Ptpru
		Cbln1		Adgra2
		Arhgap9		Pde10a
		Runx1t1		Hmga1
		Pkp2		Rasl10a
		Kirrel3		Hlf
		Hpcal4		Hrh3
		Shisa7		Phldb1
		Trp73		Wiz
		Mical2		Hic1
		Nlrp6		Shank1
		Ocln		Hspa12a
		Stxbp2		Pdgfa
		Cdkn1a		Ubash3b
		Ap1m2		Msrb3
		Kif17		Nr4a3
		Cpne7		A930012L18Rik
		Stk32c		Kank2
		Srcin1		Mir5046
		Obsl1		Marveld1
		Cabp1		Mmp17
		Sgpp2		Plec
		Gcnt1		Cpeb1
		Ccdc61		Nrxn2
		Tiam1		Tfeb
		9130019P16Rik		Cited4
		Map3k6		Dab2ip
		Alox8		Csrnp1
		Hdac9		Iqsec1
		Rgs16		Gpr157
		Mfsd4a		Mapk11
		Vgf		Macrod1
		Adora1		Ppp4r4
		B4galnt1		Psd
		Bbc3		Mapk12
		Itga3		Rarg
		Shisa8		Gm23363
		Rtbdn		Tssk3
		Neurl1a		Plch2
		Cacna1i		Dgkh
		Gm9899		Rybp
		Lingo3		Mapkapk3
		Car15		Hand1
		Stx3		Cdc14b
		4933417D19Rik		Usp35
		Phf24		Lmx1a
		Rgs8		Hoxd3
		Cntfr		Cdx2
		Stpg1		Lef1
		Paqr9		Meis2
		Vegfa		Nxph3
		Pde4c		Dpf1
		Matk		Emilin3
		Camk2b		Rgma
		Bhlha9		Syde1
		Pard6b		Gm12339
		Irf2bpl		Hapln4
		Tmem51os1		Adcy8
		Thy1		Fam78a
		Ntrk3		Plxdc1
		Ptpre		Pde10a
		Rnf123		Gp1bb
		Tenm1		AW011738
		Fgf9		Speg
		Zhx2		Prkcz
		Tmed2		Itgb5
		Mctp1		Cracr2b
		Scd1		Nr4a3
		Dusp5		Nhlh2
		Tmod1		Mcam
		Aifm3		Gpat3
		Kndc1		Zfp296
		Jph1		Arhgap27
		Tbc1d30		Lrg1
		A930018P22Rik		Ell3
		Scnn1g		Rgs11
		Fads6		Chd5
		Drc1		Ush1g
		Frs2		Coro6
		Mamld1		Zfp36
		4930594M22Rik		Dusp2
		Svep1		Tmem132c
		St6galnac6		Tmem59l
		Nacc2		1700018A04Rik
		Megf11		Sema6c
		Jph3		Shtn1
		Atp2b4		Adamtsl5
		Hoxd11		Artn
		Ebf4		Il4i1
		Ldlrap1		Slc5a5
		Fgfr1		Elovl7
		Actn1		Psd
		Myo7a		Rab37
		Insl3		Kazald1
		Cnnm1		Plvap
		Slc6a20a		Plk5
		Cyrib		Slc12a5
		Rnf128		Rgl3
		Kcnip1		Dtx1
		Ndrg4		Gbx2
		Bdnf		Rassf5
		Ercc1		Ncmap
		D630044L22Rik		Gm53
		Lancl3		Pde4c
		Exoc6		Ssbp4
		Gpr27		Tagln
		Nhsl2		Mir7671
		Arhgef4		Lrg1
		Col19a1		Bcl9l
		Bdh1		Gm17634
		Abcg1		Eps15
		Gm23450		Wac
		Spryd4		A330009N23Rik
		Olfm1		Klf15
		Scn1a		Gprc5b
		Snap25		Plekhh1
		Sez6l2		Tmem151a
		Celf6		Rffl
		Ric3		Trim9
		Map7d2		Ppm1m
		Habp4		Rcan2
		Acer3		Impa2
		Ccdc177		Pcgf5
		Dbp		Tspan18
		Tmem150a		Rbfox1
		Stim1		Gata2
		Hdac11		Grb10
		Kdm6b		Stat5a
		Sphk1		Hand1
		Pde1b		Nkx2-1
		Alox8		Sik1
		Lingo1		Pitx1
		Brinp3		Tmem30b
		Gnao1		Kcng3
		Hmcn2		Foxq1
		Trnt1		Haglr
		Scn8a		Dmrta2
		Strap		Hand2os1
		Kcp		Pltp
		Atoh7		Mnx1
		B3galt5		Mideas
		Dgka		Rasal3
		Cadm2		Sowaha
		Psg16		Gm13889
		Maged1		Pth2
		Disp3		Mpst
		Mafk		Pdzd2
		Fgd4		Sec31b
		Pde10a		Six2
		Isoc2b		Slco4a1
		Trub1		Nfatc1
		Il1rl1		Rap1gap
		Micu1		Tmem189
		Rnf212		Igf2os
		Zfp976		Ltbp3
		Hcrtr2		Gbx2
		Eipr1		Man1c1
		Cntrl		Nkx2-1
		Speer3		Parp12
		Vmn2r22		Vax1
		Edem1		Prdm16
		D830030K20Rik		Esx1
		Arg1		Fgf16
		Asic3		Hs3st3b1
		4930503B20Rik		Nkx2-3
		Glrb		Adgrb1
		Evc2		Tlx1
		Trim38		Nkx2-5
		Trpc4		Begain
		Zbtb16		Foxd2os
		Filip1		Sh3bp1
				Daam2
				Plxnd1
				Sox1
				Fgf18
				Hes3
				Hmx1
				Tfap2c
				Prdm16
				Hmx1
				Bag3
				Fendrr
				Tfap2a
				Neurog1
				Pappa
				Gpr153
				Nkx2-2os
				Kcnb1
				Dmrta2
				Mn1
				Gata2
				Ttc7
				Foxf1
				Sox17
				Tbx1
				Ptprt
				Cdx2
				Tbx4
				Hoxc12
				Wnt7b
				Hoxc11
				Evx1os
				9530036O11Rik
				Six3
				Hoxd3
				Jhy
				Hand1
				Prkag2
				Fev
				Lhx6
				Mir615
				Gad1
				Tbx3
				Pdgfa
				Pax1
				Nkx3-2
				Sox14
				Mir219b
				Msx1
				4930404N11Rik
				Mir1199
				Tpm1
				Nkx2-5
				Rasgrp2
				Sfrp5
				Enpp1
				Irx4
				Dmrt1
				Gata2
				Gdf1
				Dlk1
				Ecel1
				Foxa2
				Gpr160
				Hhex
				Fam189a2
				Gsx2
				Skor2
				Pax2
				Hoxd11
				Foxc2
				Mir1247
				Hoxa10
				Tfap2c
				Tbx20
				Olig2
				Six2
				Hoxa5
				Foxf2
				Vax1
				Gm14204
				Irx3
				Tfap2c
				Tmem200b
				Igf2os
				Hoxa4
				Sall1
				Hoxd9
				Six3
				Gnas
				Hspa1b
				Hspa1a
				Sema3f
				Hoxc12
				Mt2
				Mmp17
				Pax9
				Chat
				Fes
				Gbx2
				Bhlhe23
				Dusp9
				Nanos3
				Slc1a1
				Ccdc69
				Mir7-2
				Epb41l4b
				Triobp
				Tbc1d1
				Camk1d
				Lonrf3
				Fgd4
				Bcor
				Pls3
				Larp6
				Sgms2
				Rab6a
				Rgs3
				Bcor
				Klhl15
				Chic1
				Ftx
				Ppp2r5a
				Unc45b
				Polrmt
				Pcgf5
				Rap1gap2
				Cebpa
				Oxr1
				Pwwp2b
				Susd4
				Dusp22
				Elk3
				Eva1c
				Gpr153
				Plxna4
				Lifr
				Nsmf
				Rom1
				Inppl1
				Smad3
				Maf
				Inka1
				Bcorl1
				Jade1
				Stx2
				Polg
				Lgals1
				Nsmf
				Crim1
				Nectin1
				Mdga1
				Acot6
				Osbpl3
				Agrn
				Gm10649
				Samd4
				1700067K01Rik
				Arl4c
				Pard3
				Clstn2
				Maf
				Asap1
				Arc
				Ppp1r14a
				Zfp651
				Foxa2
				Gng8
				Gprc5b
				Tmem28
				Tmem28
				Arvcf
				Dnase2a

## Sheet: Figure S3
C1		C2		C3
Dst		Mrc2		Syt2
Smad5		Nlk		Grin2c
4932412D23Rik		Bmp6		Mir598
Myo1d		Gfra1		Lemd1
Ndufaf5		Pth2r		Fcrlb
Nlgn1		Rad51b		Slc36a1
Cbr3		Slco2a1		Six3
Rorb		Gm3317		Prkce
Psma8		Gm3317		Pcdh1
Gm15509		Gm3636		Megf11
Sh2d1a		L3mbtl4		Kndc1
Thada		Pinlyp		Pim3
Prelid2		Nsun3		Wdr7
Tnc		Mocs1		Spata20
Glis3		Stra8		Myh14
Pacs1		Col23a1		Nat9
Magi2		Endou		Arhgap30
Adcy3		Ccnh		Lin7a
Spon1		Hsd17b13		Zdhhc22
Dgkd		Syne3		Megf11
Ubr2		4933402N22Rik		Lsm2
Tspan13		Vmn2r71		Gm8909
Prl		Disc1		Syt7
Znhit1		Gpc6		Apba1
N4bp3		Kng1		Zfp467
Nedd4l		Vps26c		Hoxb6
Pik3ap1		Spink13		Zfp469
Adcy1		Gm13986		Gng8
Galnt17		Tyrp1		Arhgap23
Hhat		Nav1		Hlcs
9130230L23Rik		Tmcc3		Camta1
Nav3		Loxhd1		Irx4
Tiam2		Fam189a1		Foxb2
Iqch		4930577N17Rik		6430503K07Rik
Zbtb20		Col19a1		Opalin
Rsph3b		Xxylt1		Sim1
Dcp2		Eea1		Dmrta2
Ncald		Zfp407		Bcor
A330008L17Rik		Ddx31		Wwox
Ppp1r12b		Tnfsf13b		Gm973
Tiam1		Rrp7a		Kdm6b
Fbxw8		Cdk14		Grin2c
Tenm3		Prim2		Cbx8
Acnat2		Prex1		Mir135a-1
Ddhd1		Bbip1		1810021B22Rik
Slc16a2		Stxbp5l		H2-DMa
AU016765		Gm10668		Npas4
Zfp810		Lgr5		Foxd2os
Ros1		Pcca		Ksr2
Gm17746		Hmgn1		Exoc3l2
Opa1		Ccr6		Ppfia4
Utp18		Mir181a-2		1700025C18Rik
Dok5		Trerf1		Tbx3
Nebl		Cse1l		Uncx
Slc41a2		BC016579		Dbx2
Egfem1		Cdh12		Wwox
Dapk2		Dmrt1i		Brd3
Gm17660		Maob		Cdkn2a
Agap1		Nav1		Xkr6
Naa50		Epsti1		Pdxk-ps
Synb		Zfat		Asic4
Apob		Gm19500		Gng7
Schip1		Arhgap19		Zfr2
Rasgef1b		Gm3636		Smad6
Washc2		Gm3636		Thsd4
Slc35f5		4933406F09Rik		Nrg2
Abcc10		Dpyd		C1qtnf4
Cdh13		1700026F02Rik		Marveld3
Polr1b		Galnt2		Cited4
Dlgap4		Adamts2		Sgsm1
Thrb		Gm15501		Tbx5
Eln		4930592I03Rik		Dlx6os1
Diaph2		Srsy		Plxna1
Fsd1l		Myom2		Shank1
Pisd		Rasgrf1		Mir6995
Sdhaf2		Cavin2		Wwox
D230025D16Rik		Pard3bos2		Shkbp1
Abr		Opcml		Ldhal6b
Ipmk		4930505G20Rik		Uncx
Cd101		Man2a1		Lhfp
Tpr		2810032G03Rik		Megf11
Gm20187		Zfp236		Map2k2
Ccdc60		Rasgef1b		Rara
Tent4a		Cdh6		Fam160b2
Gm1604b		Prkn		Wdr7
Pik3ap1		Pou5f2		Fbxo41
Grip1		Xpnpep1		Fkrp
Clic6		Iqgap1		Dlgap1
B3gnt2		Gm5915		Megf11
Elapor1		Pld5		Shank1
Enox1		Mdga2		Megf11
Svil		Disc1		Gmppa
Gk2		Dab1		Bcl6
En1		Myo5b		Slc26a10
Mir7025		Pamr1		Tspan9
Mir6237		AW146154		Hsd17b12
Phactr2		Grm5		Dusp8
Ano2		Gtf2a1l		Lmtk3
Gm15412		Dgki		Megf11
Syn3		Caln1		Tbcd
Nln		Rbfox3		Jph3
Rnf157		Gm4791		Ttc41
Tox2		Grin3a		Tgfbr3
Sdk2		Grin3a		Gmpr
Kcnn3		Prss41		Tdrd7
Wwc1		Morrbid		Slc66a2
Abr		Tm9sf4		Dcp1a
Mir181a-2		Afg3l1		Nmnat2
Mmd		Mir6944		Zfp46
Tbcel		Sez6l2		Myh14
Sstr2		Celf4		Pigv
Gm36908		Kcnc1		Plxna1
Runx1		A2m		Phf21a
Syne3		A2m		Luzp1
Csmd1				Tspan4
Slc24a2				Kcnk15
Myo16				Kirrel3
Frmd4a				Stx11
Clip4				Htra1
Itga9				Gpr179
Kcnn3				Brf2
Sec31a				Flrt1
Klhl25				Mir1982
4732490B19Rik				Map3k7cl
Fam120a				Tubg2
Syne3				Irx4
Prickle1				Megf11
Prickle2				Wwox
Sntg2				Gm14204
4930448F12Rik				Prdm16
Prickle2				Wscd2
Arhgef28				Bcor
Gpat3				Galnt17
Aff3				Cldn9
Grip1				Slc22a7
Arhgap28				Osbp2
Adam12				Efcab12
Ints11				Arap3
Coch				Wwox
D830030K20Rik				Auts2
Gm3317				Ube2m
Gm3317				Mical2
4933406F09Rik				Cacna2d2
Grm7				Arhgap23
Vsir				4921507G05Rik
Cntn3				Sptbn4
Mir8120				Nat9
Tmcc3				Mir1900
Erich6b				Wapl
Grip1				Mapk15
9430014N10Rik				Foxa2
Grip1os2				Barhl2
Dlgap2				Urad
Ntm				Zfp644
Prickle1				Nr2f1
Fsip1				Slit3
Prex1				Marchf3
Mir7211				Agap2
Foxd2				Shroom1
Elapor1				Itgb5
Mannr				Macrod1
Plppr4				Otub1
Flnb				Wwox
Arhgap32				Wwox
Pcsk5				Nkx6-3
Bub3				Barhl2
Nek7				Wnt10a
1700008C04Rik				Mir7243
A730018C14Rik				Cacna1a
Cldn14				Casz1
Ppp2r3a				Cuedc1
Plcl1				Gm10421
Kcnh7				3110009F21Rik
St14				Grin2c
Slc35f1				Lhx4
4921513I03Rik				Efna2
Myo5b				Hs3st3a1
Slc2a3				Coro6
Gm1587				Cuedc1
Gm6498				Abi3
Tmem241				Hoxb3
Mnd1-ps				Bcor
Fgf7				Nrn1
Gm35725				B230323A14Rik
Lyplal1				Aqp2
Slc14a2				Fignl2
4933417O13Rik				Gm36246
Tenm2				Hoxc13
Dlgap2				Hoxc6
Gm4832				Scn4b
Bub3				Slc22a7
Tjp1				Six3
Btbd11				Six2
Gm1968				Tlx1
Shank2				Btrc
Mgat4c				Sh3pxd2a
Nlrp14				Gm13420
Gli2				Foxl1
Prrc1				Irf8
Capn8				Irf8
Ptprm				Prdm12
Tshz2				Lmx1b
Snx9				Wwox
Etl4				Zfhx3
Ptprm				Pax1
Arhgap32				Foxa2
4930505G20Rik				Jph2
Slc4a1ap				Cdh22
Gli2				Mt1
Grm3				Pitx2
Lrrc55				Jak1
Fhit				Rhd
Plin4				Pax7
Baiap2l1				Casz1
Adamts17				Prdm16
Gm36201				Tnfrsf18
Ulk4				Mnx1
Spata48				E130018O15Rik
Mir5709				Hmx1
Efcab6				9330198I05Rik
Gldc				9330198I05Rik
2410141K09Rik				Tbx5
Lhfpl3				Tbx5
Eln				Lhx5
Rhot1				Cdx2
Enox1				Urad
Gm5089				Dlx6os1
Mzt1				Dctn1
Gm30551				Gm29683
Dlgap2				Gm29683
Cdh4				Shkbp1
D5Ertd579e				Shkbp1
Shb				Elac2
Bmp7				Tspan9
Hs3st2				Zfp853
Prdm16				Zfp316
Gm7762				Pex14
4930505G20Rik				Celf4
Spertl				Megf11
Dlgap2				Eomes
Gm20187				Fendrr
Ajap1				Tmem170
Gli2				Tbx1
Efcab6				Camta1
Mir7025				8430423G03Rik
Rasgef1b				Rbm28
Hdgfl3				Dapk2
Ebf3				Tspyl2
4930401O12Rik				Zrsr2
Gstt1				Nsf
Mir215				Slc9a3r1
Proz				Hlcs
Specc1l				Cuedc1
Fancc				Lncpint
Dip2a				Gp5
Cse1l				6430562O15Rik
Unc5d				Hmx1
Pantr1				Mir29b-1
Serpine2				Kirrel3
Cadps				Pde10a
Togaram2				Wiz
Ntm				4921534H16Rik
Tmcc3				Arl15
Mir7025				Mall
Akap6				Jazf1
Zfp217				Wnt7a
Myo16				Vps8
Prickle1				Nav2
Togaram2				Zfp607a
Col18a1				Cdyl2
Lifr				Abcc6
Thbs1				Cnot8
Grin2b				Nat9
Prkar2b				Mir129-1
Ptpn13				Ammecr1
A730004F24Rik				Celf5
Mir3108				Gas7
Rgl1				Ccne1
Cfap61				Srcin1
Arhgef17				Zfp644
Xxylt1				Rasl10b
Pcdh18				Abca7
Phtf1				1700018A04Rik
Mzt1				B230323A14Rik
Sorcs1				Cdh22
Dock1				Lrfn1
Gm36908				Lrcol1
Tmem132d				Nfic
Sh3gl3				Fam78b
Esrrg				4930546K05Rik
Gldc				Otub1
Clip4				Galnt17
Slc22a12				1600010M07Rik
Shank2				Luzp1
Fam189a1				Atoh8
Sh3gl3				Cdh22
Xylt1				Pura
Pdzd2				Sec61a1
Sh3gl3				Nmnat2
5031434C07Rik				Shkbp1
Adamtsl3				BB014433
Marchf1				Cspg5
Homer2				Meis3
Gm6878				Flrt1
Vps13a				Sorl1
Vav2				Mir129-1
Nav1				Wnt7a
4732490B19Rik				2310011J03Rik
Prickle1				Tmem151b
Frk				Cacna1g
Rbms3				Kirrel3
Pam				Wdr7
Scn10a				Pitx1
Cfap61				Megf11
Pnliprp2				Fbxo2
Xylt1				Tgfbr3
Efnb2				Grin1
Nell2				Dido1
Pcsk5				Cadm1
Pik3c3				Mid1
Akap13				Slc22a7
Creb5				Gm11190
Agfg1				4930546K05Rik
Vmn2r44				Tpk1
Vmn2r38				Zfhx3
Vmn2r35				Phf21a
Vmn2r45				Grin3a
Vmn2r46				Sez6
Vmn2r47				Dmtn
Sorcs3				Flrt1
Cdkn1c				Rora
Greb1				Dlgap1
Plcxd3				Sorl1
Nalcn				Hlcs
Sorcs3				Exoc6
Spata17				Kcnq4
Pkdcc				4933427D06Rik
Ppp2r2b				Olfr221
Hlf				5830454E08Rik
Rhoq				Sptbn4
Rnf220				Tiam2
Tmem45a				Creb3l1
Pepd				Mir124-2hg
Sh2d4b				Fezf1
Fam189a1				Mir124a-3
Abca13				Celf4
E130307A14Rik				Rasip1
Iars				9430018G01Rik
Bcar3				Rph3a
Adamts9
Kctd16
1110028F18Rik
Man1a
Hbp1
Ctnnbl1
Sox5os3
Ulk4
9630013A20Rik
Esrrg
Vmn2r55
Myo19
Slc39a11
Gm8882
Pag1
Reln
Ptcd1
Katnip
9430014N10Rik
Adra1a
Pcsk5
Kit
4933424L21Rik
Adamts17
Arhgef28
Tlr5
Dlgap2
Sorcs3
4933400L20Rik
Sorcs3
Frmpd1
Iqsec3
Gm10578
Abr
Mzt1
Itgb6
Prkar2b
Dlgap2
Sec16b
Nln
Adgrl2
Myo16
Sdr42e1
Adgrl2
Sox6
Myo6
Dlgap2
Unc93a2
Cabin1
Gspt1
Endod1
Cog5
Sorcs2
Agl
Mir7210
Cracd
Zcchc24
Tox3
Rgl1
Shank2
Myo5b
Clec3b
Gli2
Grm7
Ngf
Vwf
Clip4
E130114P18Rik
D7Ertd443e
Scn3a
Cracr2a
Abcb5
Tmem241
1700047E10Rik
Gm48957
1700008C04Rik
Cfap61
Mup13
Snhg14
Lifr
Zfp984
1700003C15Rik
1300017J02Rik
Ebf1
Mir875
a
Bicc1
Eif2s2
Hunk
Mdga2
Ninj2
Vav2
Mdga2
Katnip
Plcb1
Gmds
Gucy1b2
Ctnnbl1
Ppp1r13b
Atrnl1
Rbm46os
Arhgap26
ccdc198
Galnt11
Ncoa1
Pggt1b
Zfp61
Gm26760
Map2k6
Epha5
Dcc
Ntm
Gan
Herc1
Nmnat3
Lrrfip2
Sgms1
Bmp2k
Smco2
Map3k4
Mir693
Tnfrsf8
Kremen1
Fbxl17
E2f7
Bckdha
Gm16090
Rbmy
Tshr
D830005E20Rik
Plcz1
Vcl
Zmiz2
Dlgap2
Mir551b
Mmp16
Ranbp10
Bmp5
Pip5k1b
Ap1ar
Gm16090
Mest

## Sheet: Figure 4D
H3K27me3+ Promoters due to Kdm6b-cKO
Up		Down
Amer3		4931408C20Rik
Syt2		9230019H11Rik
Sec16b		Cfap54
Fam78b		Sfi1
Kif26b		4930503E14Rik
Kif26b		1700030N03Rik
Itpkb		1110059E24Rik
Plxna2		Cyp2c53-ps
Grm1		Cyp2c29
Sh3rf3		Arnt
Unc5b		Spata1
Hcn2		Map3k7
Gadd45b		Mup22
Agap2		Nsun4
B4galnt1		Zfp990
Gas2l1		Zfp981
Rhbdf1		Zfp984
Septin8		Speer4d
Kcnj12		Slc34a2
Chd3		Gm4884
Ankrd13b		Xpo6
Pipox		2610005L07Rik
Sez6
Sez6
Asic2
Car10
Cacna1g
Adam11
Arhgap27
Crhr1
Tanc2
Grin2c
Timp2
Nptx1
Dact1
D030025P21Rik
Irf2bpl
Zdhhc22
Tunar
Unc5a
Prr7
Spock1
Fam81b
Plk2
Phyhip
Hr
Ly6h
Fam83h
Scx
Shisa8
Mapk11
Nell2
Etv5
Bcl6
Pde10a
Grm4
Cdkn1a
Prrt1
Vegfa
Galnt14
Fez2
Egr1
Ppargc1b
Pitpnm1
Syt7
Cnnm1
Dusp5
Afap1l2
Ajm1
Rxra
Olfm1
Fjx1
Gm14207
Fbn1
Epb41l1
Dlgap4
Rims4
Slc12a5
Cdh22
Mir124a-3
Zbtb46
Fndc3b
Zbtb7b
Kcna2
Cntfr
Cntfr
Tmod1
Gabbr2
Zfp462
Ak4
Lrp8
Lrp8
Csmd2
Sdc3
Trnp1
Rps6ka1
Disp3
Mmp23
Fzd1
Agap3
Gm9899
Dok7
Adra2c
Hs3st1
Kcnip4
Sowahb
Tgfbr3
Galnt9
Sh2b3
Clip1
Caln1
Vgf
Chn2
9130019P16Rik
Atoh8
Plxna1
Iqsec1
Foxp1
Gxylt2
Bhlhe40
Kcna1
Kcna1
Tspan9
Dpf1
Scn1b
Shank1
Ptpn5
Otud7a
Rgma
Ntrk3
Gdpd5
Arntl
Spon1
Gas6
Ank1
Zfp703
Dusp4
Junb
Adamts18
Gse1
Jph3
Piezo1
Gm25018
Gm23284
Gm23284
Gm22109
Kirrel3
Sorl1
Usp2
Dscaml1
Lingo1
Tpbg
Ephb1
Atp2b3

## Sheet: Figure S6A
C1		C2
Aqp1		Sfrp1
Cadps2		Apod
Capn11		Atp1b2
Ddr2		Atp6v1g2
Esrra		CT010467.1
Fbn1		Cacna1i
Hnrnpd		Clstn2
Igfbp2		Dao
Igsf3		En1
Map4k4		Fth1
Mvd		Gabbr2
Ndufb8		Galnt15
Nr2f2		Gnas
Taf15		Lars2
Tmem72		Pcsk1n
Arhgef25		Pde1c
Cirbp		Trp73
Col9a3		Tspan7
Dpysl2		Zfp467
Flna		Zyx
Fus		Ak4
Htr2c		Ank1
Kcnk9		Aqp6
Pabpn1		Atp1a1
AI480526		Bcl6
Ttr		Bhlhe40
Tspoap1		Bsn
Syngap1		Camk4
Rps17		Cbln3
Adgrl2		Chn2
Afap1		Cntn6
Apc2		Dlgap1
Basp1		Dnm1
Cd24a		Eef1a2
Cdh13		Elmsan1
Cenpf		Fads6
Cntn2		Faim2
Ctxn1		Fgfr1
Dbn1		Gabra1
Dcc		Gabrb2
Dchs1		Gde1
Ddit4		Gdf10
Draxin		Golga7b
E2f1		Grm4
Eln		Igfbp5
Fxyd6		Inpp5j
Gprin1		Jup
Grm5		Kcnc1
H3f3a		Kcng4
H3f3b		Kcnj12
Hmgb3		Kcnj9
Hnrnpab		Kcnk12
Kif21b		Klhl34
Klhl29		Kndc1
Lmnb1		Layn
Map3k1		Lynx1
Marcks		Malat1
Marcksl1		Metrn
Mex3a		Nab2
Nav1		Nell2
Necab3		Nptx1
Nfib		Nptxr
Nol4l		Paqr6
Nt5dc2		Prex2
Optn		Rcan2
Pid1		Rnf208
Ppp1r14b		Scn1b
Ppp1r14c		Shroom3
Ptma		Ski
Ptn		Slc12a5
Ptprs		Snap25
Rnasel		Sowaha
Robo2		Speg
Adcyap1r1		Sv2c
Actg1		Syn1
Wdr6		Tmem56
Vps37b		Tmem59l
Vash2		Trim62
Tubb2b		Wscd2
Tomm7		Xk
Tmsb10		Zrsr1
Spata13		Aldoc
Sox11		Ano3
Slc29a1		Atp1b1
Rps29		Bend6
Rps16		Calb2
Rpl27		Car4
Rpl23		Car7
Dusp4		Car9
Ezr		Cnpy1
Fnbp1l		Dst
Hnrnpa1		Etv1
Hnrnpa2b1		Fam135b
Hnrnph1		Gabra6
Ifi203		Gpm6b
Miat		Igfbp3
Nav3		Inf2
Nhlh2		Kcnip4
Nr2f1		Kdm6bos
Nsg2		Mab21l2
Rassf4		Mapk12
Rcor2		Megf11
Rnd2		Mfsd4a
Actb		Mical2
Znrf2		Mybpc1
Zfp57		Ndrg4
Vcan		Ntrk3
Smarcd3		Oxr1
Slc44a5		Patj
Slc1a6		Pcdh9
		Penk
		Plec
		Plk5
		Plp1
		Adamts10
		Acsbg1
		Ache
		A2m
		Abi3
		mt-Nd6
		Vwa7
		Vsnl1
		Tuba4a
		Tmem91
		Th
		Syne1
		St8sia5
		Sphkap
		Sparc
		Sowahb
		Sorl1
		Snrk
		Slc1a3
		Slc1a2
		2022-09-08
		Rragd
		Rock2
		Rasgrf1
		Pxylp1
		Ptprn
		Prkcd
		Prkar1b
		Ajm1
		Exph5
		Gapdh
		Gpx4
		Mt1
		Tbc1d4
		Zfhx4
		mt-Co1
		mt-Nd5

## Sheet: Figure 5B
ZIC1/2 Up		ZIC1/2 Not UP
Hnrnpll		Pipox
Unc5b		Plxdc2
Syt2		Bend6
Cacna1e		Slc6a7
Eno2		Nefh
Mras		Arhgef15
Hr		Jakmip1
Panx2		Plk2
Rph3a		Fhad1
Kcnj9		Adamts2
Gm15179		Gm14207
Wnk2		Celf5
L3mbtl1		Fxyd1
Dst		Camkk1
Frat1		Lgr5
Ddx25		Tenm2
Ablim1		Fbll1
Pcx		S1pr5
Mtus2		Etv5
Gabbr2		Sez6
Napsa		Atp1a3
Dpf3		Lrrtm3
Kcna1		Amer3
Aopep		Mab21l2
Ccdc136		Slc35a3
Phyhip		Flywch2
Ccdc63		Tmem158
Cerkl		Lrfn3
Cyp46a1		Arhgap24
Hs3st1		Epha10
Lhfp		Rasgef1c
Atp2b3		Asic2
Klhl33		Mir124a-1hg
Plekhf1		Ufc1
Frmd5		Ptpn18
Abcg1		Tanc2
Atoh7		Optc
Rtn4r		Prss33
Ciart		2310030G06Rik
Slc17a7		Ctif
Slc35f3		Nars
Tcerg1l		Cyb561
Gm15569		Ephx4
Cystm1		Aatf
Dact1		Lpin3
Gm5148		Cryl1
Srcin1		Cnp
Atp11a		Cdkl5
Creld1		Dlg2
Spock2		Trhde
Prkce		Zdhhc22
Cdc42ep3		Mfsd13a
Pld5		Cadm4
Atxn1		Gstt2
Tmem117		Gnas
Gpr158		Csmd2
Fndc3b		Zfp541
Cysrt1		Lck
Nr4a1		Ssh3
Trim67		Rapgefl1
Col16a1		Mtmr11
Pde4b		Mospd4
Fam135b		Lrp8
Nmnat2		Catsperd
Pkd1		Cbarp
Sema6b		Abca17
Hivep3		Dlgap4
Disp3		Vgf
Ppp2r2c		Lin7b
Map3k5		Eif2b5
Slco3a1		Prkcg
Syt6		Kifc2
Rgs8		Sytl2
Nrxn2		Meg3
Tnr		Efna1
Lats2		Pknox2
Smarca2		Nebl
Jdp2		Mir7236
Ciz1		Nhlrc1
Dusp8		Rpgrip1
Sel1l3		Srrm2
Adap1		Fbxo43
Kif26b		Synpo2l
Prom2		Gsto1
Ank2		Lrrc36
Rasgef1a		Rac3
Adcy1		2210416O15Rik
Marveld2		Ccdc183
Rbfox3		Chd3
Mypop		Grin1
Arntl		Eomes
Kcnh1		Ccr9
Peli3		Pcsk2os1
Dusp7		Gm15417
Rgl1		Shkbp1
Il17d		Pianp
Jazf1		Fabp3
Gfod1		Gm15825
Cacnb4		Gm53
Slc35c1		C1ql2
Larp1b		Cyp26c1
Dnm3		Hoxc8
Pcdh1		Pax1
Arhgap26		Gm14424
Epb41		Fam163a
Leng9		Gata2
Tnrc6c		Hoxb1
Cdyl		Scn4b
Spry1		Rasl10a
Zbtb7b		Hoxb4
Atoh8		She
Cd83		Hoxd10
Egr1		Dmrta2
Cacna1a		Shroom1
Lingo1		Ggn
Polg		Gm45928
Nptxr		Espn
Pacsin3		Bcl6b
Taok3		Wnt3a
Junb		Foxd4
Rora		Stac2
Ccdc92		T
Cux1		Cdx1
Ttc34		1190005I06Rik
Pdpk1		Lhx3
Rhbdf2		Kctd1
Zbtb46		Meis2
Anks1b		9530082P21Rik
Abca5		Kcnq4
Mmp24		Hs3st3b1
Elmod1		Fev
Bcl2		Pld2
Tspoap1		Tbx1
Ntm		Nkx2-9
Smad9		Smug1
Rragd		Comp
Stard10		Gm8909
Ppm1l		Plut
Gnal		Hoxb13
Eml6		Hoxc13
Kcnip4		Hoxd12
Abcc8		Hoxb8
Nrbp2		Tbx3os2
Ppargc1b		Gm22109
Malt1		Gsc
Otud1		Pou4f2
Golga7b		Pax7
Sv2c		Gm15050
Xkr6		Foxl1
Tanc1		B230323A14Rik
Ccdc92b		Hoxb6
Bdnf		Anxa11
Epb41l3		Rap1gap2
Syt12		Hapln2
Clstn1		Mafb
Rhpn2		Hsf4
Trim2		Foxe3
Vgll4		Trim71
Atp1b1		9530059O14Rik
Nanos1		Stum
Bhlhe40		Tradd
Mical3		Hand1
Grin2a		Lmx1a
Bmi1		Eras
Jph3		Hoxb9
Fosl2		Foxb2
Pura		Onecut3
Rgmb		Vax1
Gls2		Dlx1as
Galnt9		Hoxb3
Tmem130		Fezf2
Shank1		Prdm13
Gm38426		Tfap2a
Lmo1		Klf2
Pop5		Pax9
Adamtsl5		Hoxd3
Kcnk9		Hoxa7
Egr3		Tbx5
Prkcd		Hand2os1
Hapln4		Sall4
Scarf2		Helt
Llgl2		Sox14
Mir129b		Aldh1l2
Cds1		Runx1
Mmp11		5730596B20Rik
H2-K2		Hpdl
Cacna2d2		Fgf18
Wiz		H2-D1
Crlf1		Hmx2
Adra2c		Mab21l1
Perp		Cbln1
Cgnl1		Hoxa3
Fosl1		Map3k21
Barhl2		Abi3
Foxo1		C1qtnf4
Casz1		Grin1os
Zfp385b		Mapt
Trim7		Ifi30
Efhd2		Cpne9
Rapgef2		1700020L24Rik
Apln		Slc26a8
Cacna2d3		Gjb1
Epn3		F11r
Dmtn		Cfc1
Per3		Hspa2
Ptprn		Cacna1g
Dnah11		Nrp2
St8sia5		Lrrtm1
Kcnj12		Lrrc75b
Pip5k1b		Tifa
Uncx		Kirrel3
Trim72		Lamc2
M5C1000I18Rik		Arhgap9
Fa2h		Pkp2
Mon1a		Hpcal4
Agap2		Nlrp6
Rtn4rl1		Cdkn1a
Car4		Ap1m2
Gprc5c		Cpne7
Crhr1		Stk32c
Grm4		Ccdc61
Cdk5r2		Alox8
Scrt1		Rgs16
Mmp9		Itga3
Dock9		Shisa8
Ank1		Rtbdn
Tuba4a		4933417D19Rik
Speg		Stpg1
Tunar		Pde4c
Fstl4		Thy1
Cspg5		Zhx2
Rps6ka1		A930018P22Rik
Abhd3		Scnn1g
Vwa1		Hoxd11
Tmem151a		Ebf4
Ckmt1		Insl3
Cacna1c		Slc6a20a
Sptbn4		Kcnip1
Kazn		Bdh1
Clip1		Gm23450
Il10ra		Snap25
Neurod2		Celf6
Ctnnd2		Ric3
Gpbp1		Acer3
Rras2		Tmem150a
Faah		Kdm6b
Jakmip3		Sphk1
Igsf9b		Pde1b
Phactr3		Brinp3
Ephb1		Hmcn2
Dbndd2		Trnt1
Ntrk3		Scn8a
AI854703		Kcp
Gabrd		B3galt5
Fndc5		Dgka
Car10		Psg16
Car11		Mafk
D030025P21Rik		Isoc2b
Pak1		Trub1
Zfp385a		Il1rl1
Nrros		Micu1
Cep170b		Rnf212
Nr4a2		Zfp976
Bhlhe41		Hcrtr2
Ppp3cc		Eipr1
Zfyve28		Cntrl
Paqr9		Speer3
A730098A19Rik		Vmn2r22
Ache		Edem1
Shfl		D830030K20Rik
Runx1t1		Arg1
Shisa7		Asic3
Trp73		4930503B20Rik
Mical2		Trim38
Ocln		Trpc4
Stxbp2		Zbtb16
Kif17		Filip1
Obsl1		Mpp2
Cabp1		Gm2027
Sgpp2		Rcan1
Gcnt1		H19
Tiam1		Slc25a42
9130019P16Rik		1700016K19Rik
Map3k6		Nr0b2
Hdac9		Fstl3
Mfsd4a		Myo1c
Adora1		Vav1
B4galnt1		Mpig6b
Bbc3		Hsd17b1
Neurl1a		6530402F18Rik
Cacna1i		Des
Gm9899		Mir1966
Lingo3		Atcayos
Car15		Syngr3
Stx3		Kcnk4
Phf24		Ankrd13b
Cntfr		Hexim1
Vegfa		Pxmp2
Matk		Epha1
Camk2b		A230051N06Rik
Bhlha9		Flt3l
Pard6b		Nrn1
Irf2bpl		Cnn2
Tmem51os1		Pdlim2
Ptpre		Ntf5
Rnf123		Dhh
Tenm1		Mir7240
Fgf9		Racgap1
Tmed2		Prrt1
Mctp1		Gm20517
Scd1		Prox1
Dusp5		Eml2
Tmod1		Mir7055
Aifm3		Mir129-2
Kndc1		Jsrp1
Jph1		Foxh1
Tbc1d30		Cldn6
Fads6		Rgcc
Drc1		Gm11762
Frs2		Esam
Mamld1		Ccdc106
4930594M22Rik		Mir212
Svep1		Gucy2e
St6galnac6		Isyna1
Nacc2		Tsks
Megf11		Pou2f2
Atp2b4		Abca1
Ldlrap1		Vgll2
Fgfr1		Pdx1
Actn1		Mir193b
Myo7a		Rasd2
Cnnm1		Tnfrsf11a
Cyrib		Cacnb3
Rnf128		D930007P13Rik
Ndrg4		Ppm1n
Ercc1		Vwa5b2
D630044L22Rik		Hdnr
Lancl3		Sec14l2
Exoc6		Lad1
Gpr27		Irx4
Nhsl2		Tnfaip2
Arhgef4		Camk2a
Col19a1		Crybg2
Spryd4		Prdm12
Olfm1		Sfmbt2
Scn1a		Six6
Sez6l2		Pheta2
Map7d2		Eya2
Habp4		Tmem132e
Ccdc177		Amn
Dbp		Zfp503
Stim1		Wnt11
Hdac11		Erfl
Gnao1		Etv4
Strap		Mir193a
Cadm2		Lin28a
Maged1		Gp5
Fgd4		Slc6a5
Pde10a		Tacstd2
Glrb		Gm49890
Evc2		Mir196a-2
Ralb		Ptp4a3
Acvr1c		2410017I17Rik
Gas2l1		Trank1
Sh2b3		Gm16136
Dnajc6		Pkp1
Kdm2b		Hoxa9
Ttyh1		Aqp5
Adarb1		Lhx2
Otulinl		Hoxc12
Kcnab3		Rasal3
Itgb5		Gm12992
Ksr1		Six3os1
Oplah		Esrrb
Wscd1		Ppl
Ptpn21		Cd70
Pik3cd		Arhgef39
Ctdsp1		D930020B18Rik
Fmnl1		Galr1
Ahr		Wwox
Chn2		Rnd1
Plxna1		Ush1g
Mir5135		Rhod
Gpr176		Tmem191c
Spock1		Arid3c
Arvcf		Fosb
Fgf12		Mir1900
Syt7		Extl1
Rnf144b		Gm10575
Lyn		Hcn4
Gmpr		Zmynd10
Phospho1		Cdk18
1700125G02Rik		Pcsk1n
Epha8		Col8a2
Iglon5		Tmc5
Sipa1l1		1700124L16Rik
Ppp1r1b		Col13a1
Klhl21		Gm28626
Map7		Rln3
Cbx7		Hotairm2
Wnt7a		Pnmt
Mfap2		Pip5kl1
Stk10		Rspo3
Crb3		Gm11729
Tesc		Erbb3
Rara		Pitx3
Fbrsl1		Jak3
Nrg3		Snai3
Slit3		Cyp27b1
Afap1l2		Gm15631
Mir124a-3		Tdrp
Cyp1a1		Lrp4
Usp2		Gm25212
Agbl2		Pdk1
Srrm3		Bcr
Orai3		Arhgdig
Dnaja4		Pax6
Sfmbt1		Pcsk6
Ppp1r13l		Atcay
Fos		Aph1c
Acta1		Zfp607a
Scn1b		Atp6v1b1
Agap3		Otx2
Zfp703		Pparg
Megf8		Bsx
Car7		Npb
Lrrc24		Bspry
Abcb9		Gpsm3
Scx		A330040F15Rik
Myrip		Dnali1
Rap1gap		Mir7009
Mylip		Cst6
Iqsec1		Alkbh3os1
Pdxk		Osr1
Myh14		Chst11
Trmt9b		Spint2
Ckb		Radil
Cdh22		Gltpd2
Kcnc1		Fam155a
Mpzl3		Iqsec3
Plec		Helz
Tcp11l2		Zbtb8b
Zdhhc18		Spon1
Nt5c2		Snta1
Trpc1		Sned1
Klhdc8a		Asic4
Nrip3		Epor
Galnt17		Hmx1
Myo1d		Spry4
Fam78b		Hoxa1
Tspan4		Hoxa5
Bcl6		Uap1l1
Ampd3		Ccdc116
Ablim2		Ccdc184
9930012K11Rik		4933428G20Rik
Ptchd1		Arhgap45
Rhbdf1		2210408F21Rik
Zbtb7a		Hmga1
Otud7a		Hic1
Pitpnm3		A930012L18Rik
A930004D18Rik		Mir5046
Bahd1		Cpeb1
Slc9a3r1		Gpr157
Nab2		Gm23363
Kcnip3		Tssk3
Akain1		Dgkh
Egr4		Cdx2
Oxt		Lef1
Ankrd34a		Rgma
Dgkz		Fam78a
Cdon		Plxdc1
Grb7		Mcam
Npas2		Zfp296
Kcnk12		Ell3
Slc16a11		Rgs11
Mmp23		Coro6
Ajm1		1700018A04Rik
Gpr25		Il4i1
Pitpnm1		Slc5a5
R3hdm4		Plvap
Kcnc4		Gbx2
Gadd45b		Rassf5
Tead4		Ncmap
Insyn1		Tagln
Hcn2		A330009N23Rik
Ubtd1		Impa2
Synj2		Tspan18
Gas6		Stat5a
Trnp1		Nkx2-1
Tspan9		Pitx1
Flt3		Tmem30b
P2rx5		Kcng3
Slc2a1		Foxq1
Rab37		Haglr
Dscaml1		Pltp
Coro2a		Mnx1
Cx3cl1		Pth2
Slc41a2		Mpst
Map3k9		Sec31b
Hes7		Six2
Hbegf		Igf2os
Itgb3		Prdm16
Cacna2d1		Esx1
Ptpn3		Fgf16
Slc8a3		Nkx2-3
Strip2		Tlx1
6430548M08Rik		Nkx2-5
Kcns1		Begain
Shank3		Foxd2os
Pstpip2		Sh3bp1
Pkdrej		Sox1
Itpr3		Hes3
Sfn		Tfap2c
Kcnk3		Fendrr
Nfatc2		Neurog1
Hrk		Nkx2-2os
Arhgef3		Mn1
Rnf39		Foxf1
Tmem163		Sox17
Rcc2		Ptprt
Dab1		Tbx4
Epha2		Wnt7b
Adm		Hoxc11
Mir378a		Evx1os
Kcna2		9530036O11Rik
Galr3		Six3
Kcnh3		Jhy
Dgkg		Lhx6
Tub		Mir615
C77080		Gad1
Rasal1		Tbx3
Tmem108		Nkx3-2
Dpp10		Mir219b
Odf3b		Msx1
Grin2c		4930404N11Rik
Slc12a5		Mir1199
Snhg11		Enpp1
Fgf14		Dmrt1
Dnm1		Gdf1
Caln1		Dlk1
Nrg2		Ecel1
Slc6a17		Foxa2
Ahdc1		Gpr160
Vamp8		Hhex
Tgfa		Gsx2
Rims4		Skor2
Sowahb		Pax2
Fam83h		Foxc2
Cadm1		Mir1247
Unc5a		Hoxa10
Nbeal2		Tbx20
Mcf2l		Olig2
Tbc1d8		Foxf2
Adcy8		Gm14204
Mgat4a		Tmem200b
Nt5c1a		Hoxa4
Slc9a3r2		Sall1
Mettl24		Hoxd9
Tlcd4		Hspa1b
Tdrd7		Hspa1a
Sorl1		Mt2
Shcbp1l		Chat
Pigz		Fes
Bmf		Bhlhe23
Arhgap27		Dusp9
Vldlr		Slc1a1
Kcnt1		Mir7-2
Mxra8		Bcor
Sgms2		Pls3
Mir1895		Chic1
Fzd4		Ftx
Proser2		Unc45b
Dlc1		Polrmt
Foxp1		Cebpa
Prr16		Elk3
Grb10		Nsmf
Acbd4		Smad3
Ssbp4		Stx2
Rarg		Lgals1
Rras		Gm10649
Phf13		1700067K01Rik
Hps6		Asap1
Afap1l1		Arc
Camkk2		Zfp651
Denn2b		Gng8
Farp1		Dnase2a
Tgfbr3
Brsk2
Micall1
Slc6a6
Cnnm2
Adamts18
Slc16a9
Camk2n1
Ralyl
Apoa1
Gm15517
Phldb1
Utrn
Tmem243
Fez2
Stat6
Susd4
Dtx4
Abcc4
Efemp2
Gipc2
Nfil3
Nr3c2
Mllt6
Itpkb
Pdgfb
Chadl
Mt1
Hes5
Creb5
Kcnn2
Ltk
Tmbim1
Ptpru
Adgra2
Hlf
Hrh3
Hspa12a
Pdgfa
Ubash3b
Msrb3
Nr4a3
Kank2
Marveld1
Mmp17
Tfeb
Cited4
Dab2ip
Csrnp1
Mapk11
Macrod1
Ppp4r4
Psd
Mapk12
Plch2
Rybp
Mapkapk3
Cdc14b
Usp35
Nxph3
Dpf1
Emilin3
Syde1
Gm12339
Gp1bb
AW011738
Prkcz
Cracr2b
Nhlh2
Gpat3
Lrg1
Chd5
Zfp36
Dusp2
Tmem132c
Tmem59l
Sema6c
Shtn1
Artn
Elovl7
Kazald1
Plk5
Rgl3
Dtx1
Mir7671
Bcl9l
Gm17634
Eps15
Wac
Klf15
Gprc5b
Plekhh1
Rffl
Trim9
Ppm1m
Rcan2
Pcgf5
Rbfox1
Sik1
Mideas
Sowaha
Gm13889
Pdzd2
Slco4a1
Nfatc1
Tmem189
Ltbp3
Man1c1
Parp12
Adgrb1
Daam2
Plxnd1
Bag3
Pappa
Gpr153
Kcnb1
Ttc7
Prkag2
Tpm1
Rasgrp2
Sfrp5
Fam189a2
Irx3
Sema3f
Nanos3
Ccdc69
Epb41l4b
Triobp
Tbc1d1
Camk1d
Lonrf3
Larp6
Rab6a
Rgs3
Klhl15
Ppp2r5a
Oxr1
Pwwp2b
Dusp22
Eva1c
Plxna4
Lifr
Rom1
Inppl1
Maf
Inka1
Bcorl1
Jade1
Crim1
Nectin1
Mdga1
Acot6
Osbpl3
Agrn
Samd4
Arl4c
Pard3
Clstn2
Ppp1r14a
Tmem28

## Sheet: Figure S7B
ZIC1/2 Up		ZIC1/2 Not UP
Syt2		Amer3
Fam78b		Sec16b
Kif26b		Plxna2
Itpkb		Grm1
Unc5b		Sh3rf3
Hcn2		Chd3
Gadd45b		Ankrd13b
Agap2		Pipox
B4galnt1		Sez6
Gas2l1		Asic2
Rhbdf1		Cacna1g
Septin8		Tanc2
Kcnj12		Timp2
Car10		Zdhhc22
Adam11		Prr7
Arhgap27		Plk2
Crhr1		Ly6h
Grin2c		Shisa8
Nptx1		Etv5
Dact1		Cdkn1a
D030025P21Rik		Prrt1
Irf2bpl		Galnt14
Tunar		Rxra
Unc5a		Gm14207
Spock1		Fbn1
Fam81b		Dlgap4
Phyhip		Zfp462
Hr		Lrp8
Fam83h		Csmd2
Scx		Sdc3
Mapk11		Vgf
Nell2		Gxylt2
Bcl6		Ptpn5
Pde10a		Rgma
Grm4		Gdpd5
Vegfa		Spon1
Fez2		Piezo1
Egr1		Gm25018
Ppargc1b		Gm23284
Pitpnm1		Gm22109
Syt7		Kirrel3
Cnnm1		Tpbg
Dusp5
Afap1l2
Ajm1
Olfm1
Fjx1
Epb41l1
Rims4
Slc12a5
Cdh22
Mir124a-3
Zbtb46
Fndc3b
Zbtb7b
Kcna2
Cntfr
Tmod1
Gabbr2
Ak4
Trnp1
Rps6ka1
Disp3
Mmp23
Fzd1
Agap3
Gm9899
Dok7
Adra2c
Hs3st1
Kcnip4
Sowahb
Tgfbr3
Galnt9
Sh2b3
Clip1
Caln1
Chn2
9130019P16Rik
Atoh8
Plxna1
Iqsec1
Foxp1
Bhlhe40
Kcna1
Tspan9
Dpf1
Scn1b
Shank1
Otud7a
Ntrk3
Arntl
Gas6
Ank1
Zfp703
Dusp4
Junb
Adamts18
Gse1
Jph3
Sorl1
Usp2
Dscaml1
Lingo1
Ephb1
Atp2b3

## Sheet: Figure 6D
H3K27me3 Up from DIV1-7		H3K27me3 Down from DIV1-7
Tet1		Lrrtm3
Ifnz		Fbll1
Efna5		Nefl
C2cd6		Anks1b
Camk1d		Ephb1
Epb41l4a		Pitpnm3
Slitrk1		Kcnh1
Gria2		Csmd2
Erbb4		Adamts18
Galntl6		Cyp46a1
Gm15934		Car10
Kalrn		Nrg3
Flnb		Adra2c
Egfem1		Lgr5
Qsox1		Mapt
Zfp217		Ephb1
Sbspon		Ank3
Adarb2		Ccdc92
Dapk1		Fam189a1
Lypd6		Camk2b
Irf1		Rbck1
Gm10556		Slc46a2
Gabra2		Fbll1
Nhsl1		Car10
Pou3f3		Grm1
Cerkl		Car10
C130071C03Rik		Car10
Uaca		Fgf5
Mycn		Adamts18
Nsun7		Grin1os
Zfp488		Adra2c
Myo16		Ntm
Spsb4		Atp2b3
Scara5		Fzd5
Zc3h7a		Gls2
Lypd8l		Tjp1
Ptch1		Bmf
Mdga2		Elmod1
Tenm4		Sik1
Hdac9		Camk2a
Mdga2		Smad5
H2-Q4		Srrm2
Btbd11		Nfe2
Osbpl3		Gm5617
Eya1		Bcr
Fgf10		Tspan4
Pros1		Pls1
Gpr37		Lsm14b
Fgf10		Mast4
Fgfr2		Pknox2
Ssu2		Zfp541
Cntnap5a		Gjc1
Cntnap5b		Lratd1
Gm36908		Pde6g
Sgcd		Kazald1
Gja1		Dpf3
Elavl2		Slc26a2
Grip1		Fer
Jcad		Arhgap27
Palmd		Art5
Ednrb		1810010H24Rik
Pdzrn4		Phyhip
Antxr1		Otud1
Gli2		Spry4
Grip1		Ryr1
Gli2		Stum
Adarb2		Pitx3
Pantr2		Casp7
Plekha7		Rab37
Cd24a		Cldn7
Cdh20		Prkcz
Gbp7		1700052I22Rik
Luzp2		Lif
St8sia2		Foxo1
Tmem98		Slc6a7
Gldc		Adra1d
Elavl2		Mir219a-2
Pdgfra		Optc
Kit		Grb7
Gli2		Wnk4
Syngr2		Col8a2
Tox3		Pdgfa
Slc35f1		Esrrb
B3gnt5		Rara
AI593442		Cdc42ep1
Antxr2		Mixl1
Atoh1		Arhgap9
Pantr2		Cldn5
Wipf1		Arhgap27
Sash1		Adra1d
Nfe2l2		Tmem221
Oxr1		Epha2
Epha6		Ccdc194
Lmcd1		Arvcf
D130009I18Rik		Oas1g
Grb14		Rap1gap2
Plppr1		Sorl1
Mir466f-4		Dst
Adamts20		Gapvd1
Penk		Coro6
Gm36908		Bmi1
Matn2		Mapk13
Chodl		Sema6b
Frmd4a		Nrp2
Cldn1		Ankrd6
Gpr149		Pcp4l1
Phgdh		Smagp
Luzp2		Jakmip1
Spsb4		Tead4
Vwc2l		Ikzf3
Apol7d		1110004F10Rik
Tmem196		Aldh1a2
Gm15412		Unc5b
Gpr149		Arhgdig
Gja1		Faah
Bmpr1b		Chrna4
Il20ra		Fam81a
Kcnip4		Egr3
Gm13133		Ftx
Prex2		Tgfb1
Tnfrsf22		Mir1983
Thsd7b		Hsd17b1
Adamts7		Pgap6
Pde5a		Nmnat2
Elavl2		Dock9
Aplnr		Trim47
Pmepa1		Nuggc
Ppm1e		Chpf2
Spertl		Sec24a
Smo		Chst11
Efs		Trim72
Xkr5		Gnas
Cxcr4		Hcn2
Kif7		Slfn5
Tcf7l2		Gjb6
Nfe2l2		Rgs6
BC106179		Rpgrip1
AI593442		Rab7
B230216N24Rik		Selenov
Litaf		Farsa
1700029F12Rik		Sema3b
4930443O20Rik		Gas2l2
Lama1		C1qtnf4
Fbxl7		Dlk2
Dlgap2		Six4
Vangl1		Ccdc106
Gbp5		Rapgef3
Enc1		Sytl2
Ebf3		Krt8
Pdzrn4		Tpm2
6720468P15Rik		Gm23450
Gm6249		Dtx4
Aff1		Mapre3
1700122O11Rik		Klf15
Togaram2		Tfr2
Kif16b		Ccnd3
Serpina3f		Cspg5
Mecom		AW011738
Fhl2		Gpat3
Togaram2		Lpcat2
Dse		Ptpn5
Sh2d4a		Hexa
Frmd4a		Esam
Chrm2		Cgas
Gm10406		Arid5a
Clip4		Tjp3
Cald1		Klhl22
Rtl9		Mip
Col5a2		Hbegf
L3mbtl4		Fa2h
Itprip		Fam189a2
Gli2		Hbegf
Rassf3		Fzd9
Vcan		Lrp1
Gpr37		Hspa1a
Mir763		Prr7
Elavl2		Csnk1a1
Gm3411		Alox8
Abracl		Lpin3
Grip1		Rara
Stx2		Epb41
Grm3		Pde4b
Cd24a		Garnl3
4921513I03Rik		Dusp9
Tmem215		Fkbp11
Pdlim3		Mir155hg
St8sia2		Tmem50b
Zfp36l1		Mcfd2
Myb		Neto2
Stbd1		Pex5l
BC039771		Rgma
Prdm6		Npas2
Hdac9		Speg
Cyp4v3		Prrg2
Amotl1		Spry1
Myb		Ebf4
Pmepa1		Fcho1
9330158H04Rik		Gna15
Palld		Ppp1r3d
Acadl		Lrrc8e
Mir7009		Hs3st1
Mir383		Phldb3
Ceacam-ps1		Spryd4
Luzp2		Hmcn2
Mir673		Fam71e1
Asap3		Dmtn
Stc1		Fgf8
Cdh12		Gng8
Glb1l2		H2-K2
Kcnh7		Celf6
Frmd4a		Olfm2
Mrgprg		Mtmr11
Btbd11		Nr2f2
Bok		Rarg
Arhgap24		Mal
Prkd1		Tdrd7
Itprip		Kcna7
Wipf1		Susd1
Ebf3		Oplah
Hdac9		5430431A17Rik
Prr5		Dpm3
Epb41l2		Eva1b
Sema6d		Slc2a3
Camk1d		Prkcg
Igfbpl1		Cib1
Chrna3		Sh3rf3
Gm3264		Cyp46a1
Gm10406		Csmd2
Smo		Lgr5
Gm3264		Ntm
Neto1		Pimreg
C1ql1		Ajm1
Doc2a		Wscd2
Jcad		Celf6
Prokr1		Mapt
Gramd1b		Tnrc6c
Cdh20		Gpr137b-ps
Shb		Gpr137b
Antxr2		Dnali1
Insyn2a		Tcea3
Pard3b		Hivep3
Cd24a		Mcmbp
Prickle2		Caly
Tmem200a		Pipox
Zeb2		Nog
Sash1		Pld6
D16Ertd472e		Procr
Decr1		A230051N06Rik
Prkd1		Mir7020
Etl4		Ascl4
BC106179		Cacna1c
Prkd1		Cdc42ep2
Vangl1		Ccsap
Lrrc8c		Car12
Casq2		Zbtb40
Grid2ip		Gls2
Msn		Hes7
Acaa2		Ppm1l
Gpr45		Hyls1
Nps		Arntl
Ano4		Cfc1
Dmrtb1		Lrrfip1
Peg12		Hs3st1
Cldn11		Taf13
2610042L04Rik		Cxcl12
Greb1l		Marchf3
Gldc		Sybu
Dpyd		6430548M08Rik
Frmd3		Cdkn1a
Idh2		Gapvd1
Pcsk5		Spsb1
Pak5		Pak1
Tenm3		Gng7
Rapgef5		Cdx1
Efs		Kcns1
Fstl1		Cldn7
Qsox1		Nags
Tmcc3		Clcf1
Zfp800		Kcnj9
Tgif2		H2-K2
Tshz2		Itga3
Gm3500		Snhg11
Gm3500		Cavin1
Atoh1		Tll2
Epha6		Hs3st6
Itgb8		Tmem151a
Npy2r		Cux1
Mybl2		Klf15
Lrig3		Hnf1b
Lpl		Synj2
Lrrc55		Mmp9
Egfem1		Grb7
Rasgef1b		Krt222
Gramd3		Ucn
S1pr1		Ephx3
Fign		Nacc2
Mki67		Shisa7
Rbm24		Rap1gap2
Gm10649		Rarg
Tox3		Rassf1
Sec16b		Vgf
4930449E01Rik		Atcayos
Ndnf		Coro6
Cntnap5b		Epn3
Lrp5		Mtmr11
Gulp1		Dlk2
Gm26682		Zfp541
Gramd3		Crhr1
Bcat1		Meg3
Thbs1		Cacna1i
Olfml2b		Nrsn2
Pcgf5		Sez6
Lrfn2		Prcd
Tafa1		Vgll4
Pvt1		Atp7b
Mecom		Prr15l
Csrp1		Rtn4rl1
Mir99ahg		Htr5a
Trpc6		Pard6b
Adam19		Mical3
Pla2g7		Slc7a8
BC039771		Vsnl1
4930503B20Rik		Fbll1
Gm38413		Fmn1
Gm30731		Fos
Antxr1		Cacna1h
Cmtm3		Otud1
Baz1a		Npr1
Dsc3		Slc7a8
Mir379		Gapvd1
Tspan2		Fam166b
Gm33104		Slc2a3
Ifna1		Asic2
Vgll3		Tmem163
Prkd3		Phpt1
Ms4a6d		Plk5
Pde5a		Cdk5r2
Robo1		Kirrel3
Auts2		Ankrd13b
Sash1		Itga3
Amotl1		Neurl1a
Ccna1		Fads3
1500012K07Rik		Tnrc6c
Tor3a		Gng8
Mir3090		Spdya
Tshz2		D030025P21Rik
Lacc1		Ccdc106
Itih5		Shisa8
Sema6d		Tbc1d30
Gpr37		D030025P21Rik
Pard3		Megf8
Pvt1		Tmem108
Lyzl4		Vldlr
C2cd4d		Il17d
Atp10a		Timp2
Lcp2		Jph3
D130009I18Rik		Baiap3
Trmt10c		Mical3
Lrig3		Pnma2
BC006965		Lmo1
Qpct		Mtus2
Syt16		Gng8
Clip4		Gcgr
Tmem159		Shank1
Cdh20		Amer3
Rab27b		Mtus2
Evc2		Ajm1
Commd1		Otud7a
Gm9758		Crhr1
Ngfr		Zbtb8b
Entpd1		Acta1
Frmd4a		C77080
Rin2		Llgl2
Cdc42ep4		Slco4a1
Smco4		Tmem102
Il20ra		Rap1gap
Rai14		C77080
Suclg2		H3f4
Lmo3		Ankrd13b
Thrb		Vgll4
Platr9		Dock9
Ces2d-ps		Camkk2
Crybg3		Mical3
Acly		Zfp853
Wipf1		Trpm2
Znrf4		Zfyve27
Epb41l4a		Psd
1500009L16Rik		Hhipl1
Slc6a19		Tmem51os1
Rhoc		Adora1
Znrf4		Snph
Pcsk9		Mir219b
Clstn3		Niban3
Ptprk		Txnl1
Ralyl		Acp5
Sv2b		Syce2
Mir1932		Tex45
Gli3		Pnmt
Adamts5		Dmtn
Enc1		Nmnat2
Adamts1		Igfbp3
Pcdh20		Atl2
Gbp3		Gnas
Pramel51		Hspa2
A330093E20Rik		Maff
Qsox1		Shisa7
Slit2		Ccdc183
Rxrb		Fhad1
Abcb4		Klf1
Nptx2		Foxq1
Phactr2		Sidt1
Gm29571		Syngr3
Slc12a7		A930018P22Rik
Cntnap5a		Apoa5
Acp6		Cpne5
Gypc		Zbtb7b
Fkbp9		Otud7a
Col18a1		Dusp9
Dtx3l		Zhx2
1700123L14Rik		Cdyl2
Smco4		Disp3
A130030D18Rik		Hnf1b
Gm10578		Hspa2
Fyb2		Cfc1
Ryr2		Car4
Ppp2r2b		Fgf17
Pard3b		Rnf207
1700028M03Rik		Pdgfb
Mmd		Mlxipl
Lncenc1		Matk
Vangl1		Psd
Tet1		Hrk
Bmpr1b		Tub
Nfe2l2		Neu2
Sorcs3		Cacnb4
Casq2		Slc6a17
Tmem171		Lin28a
Fgfr2		Adamts2
Met		Mir7216
Hdac9		Jph3
Il20		Kazald1
Dpysl3		Extl1
Nipal1		Trnp1
Tmem268		Rap1gap2
Nhsl1		Shisa8
Capn8		Rnd1
Mdga1		AI413582
Slc12a7		Cuedc1
Cobll1		Klrg2
Tnks1bp1		Arntl
Dlgap2		Erbb3
Crim1		Coro2a
Capn1		Dhh
Steap3		Ciz1
E330011O21Rik		Syngr3
Mecom		Nrp2
Spata6		Ddn
Pon2		Baiap3
Mcf2		Gpr25
Commd1		Epha8
Svil		Ajm1
Hdac9		Tpm1
Neto1		Dusp2
Lrrc55		Tmod1
Thsd7b		Rhpn2
Hddc2		9130019P16Rik
Ston2		Fmnl1
Cav1		Frs2
Met		Rerg
Sulf1		Lrrfip1
Tenm4		Gm5148
Gm26682		Agap2
Pde11a		Vgf
Pcgf5		Phyhip
Frmd4a		Ckmt1
Adgra3		Gjd3
Tafa1		Cnn2
Robo1		Pcdh1
Ltbp1		Igfbp6
Mir100hg		Vwa1
Tor3a		Mir193b
Gm15910		Fstl4
Mir759		Tmem102
Btbd1		Scube3
Colca2		Tmem191c
Ngfr		Ubtd1
St6gal1		Mfap2
Btbd1		Col1a1
Mir99ahg		Syt7
Gm4301		Shank2
Etl4		Jsrp1
Gpc4		Itpr3
Hey2		Ssbp4
Pcdh15		Plekhf1
Klhl1		Dact1
Ogdhl		Gchfr
Cd109		Evpl
Col11a2		Hlf
Kcnv1		Tph1
Car3		Hpcal4
Tenm4		Hrh3
Arhgef26		Sema3f
Mroh5		Rln3
Stk26		Gm11729
Deup1		Ltbp4
Ston2		Pla2g2c
Mir6358		Slc35c1
Sox6os		Golga7b
Rgma		Nlrp6
Pam		A230051N06Rik
Loxl1		4933417D19Rik
Wwtr1		Fa2h
Pde5a		Speg
Cttnbp2		Spock1
C1ql3		Syt2
Tmem255a		Bcl6b
Nr3c2		Pdgfb
Gria3		Kif26b
Alkbh3		Gp1bb
Islr		Ablim1
Rasa2		Jakmip3
Acss3		Fstl4
Ube2e1		Gm11762
Kif16bos		Cacna1g
Capn8		Amn
Vrk2		Odf3b
Arhgap31		Npw
Pon2		Fosl1
D830030K20Rik		Egr4
Il15ra		Klc3
Hpdl		Ank1
Rps6ka4		R3hdm4
Mboat1		Trank1
Gbp5		Rps6ka1
Casq2		Grin2c
Atic		Ank1
Zfp516		Mir1199
Gli1		Cfap43
Rgmb		Pmaip1
Bok		Ampd3
BC039771		Bace2
Vipr2		Cldn6
Kirrel		Taok3
Creb3l2		Mir193a
Spsb4		Sowahb
Efcab6		C77080
E330011O21Rik		Tbc1d30
Adamts1		Mir124a-3
Rab34		S1pr5
Magel2		Psd
Ston2		Sphk1
Kcnip4		Hrk
Znrf4		Ptprt
Tmem98		Nacc2
Ptprm		Plxnd1
Mrgprg		Ache
Prima1		Rasl10a
Ntng1		Unc5a
Vangl1		Map3k21
Hk2		Lin28b
Vangl1		Rasgrf1
Met		Zdhhc22
Cttnbp2		Hpcal4
Acan		Kcnk6
Pcgf5		Plekhd1
Fat3		Frat2
Commd1		Ppp4r4
Pam		Tpm2
Tspan18		Ciart
Hdac9		Tagln
Mdga2		Jakmip3
Pcgf5		Shfl
Vrk1		Specc1
Chrd		Slc25a30
5730522E02Rik		Pip5kl1
Mir100hg		Pawr
Mir6358		Chd3
Mir7656		Slit3
Gm17634		Kcnab3
Mdga1		Abca17
Fgd6		Cacna1e
Parva		Klrg2
4930556M19Rik		Tmem151a
Pnpla7		4933428G20Rik
Mfge8		Rab37
Elk3		Bmp6
Map3k8		Chst7
Pcgf5		C130026L21Rik
Prkaa2		Calb2
Prkaa2		Dscam
Gli3		Nars
P3h2		Slc35a3
Pvt1		Dmtn
Gnpda1		Tox2
Sorcs3		Arg2
Svil		Vstm2l
Tmem238		Nog
E330011O21Rik		Ssbp4
Hk2		Olfm2
Scarb1		Tbc1d30
1700029F12Rik		Adra2b
Zfp36l1		Cacna1i
P3h2		Shank1
Pkdcc		Syce2
4930443O20Rik		Ccdc184
Islr2		Trank1
Zfp36l2		Ntrk3
Pam		Epn3
Mob3b		Vstm2l
Plpp3		Grm1
A330093E20Rik		Bmp6
Akna		Rhpn2
Ccdc136		Slc6a4
Pard3		Mtus2
Zfp36l2		Neurl1a
Tmtc1		Car15
Itpkb		Paqr9
Dock1		Ccdc87
Pard3		Kcnk12
Zfp36l1		Gm5148
Aldh1b1		Rap1gap2
Svil		Pou2f2
Nsmf		Prickle3
Zfp36l2		Dnm3
Frem1		Faah
Kcnh5		Pip5k1b
Adamts1		Pard6b
Mir100hg		B4galnt4
Kcnmb1		Hcn4
Spata16		Foxq1
Mir100hg		Shisa8
Kcnh5		Cyp46a1
Wwtr1		Cacna1a
Ccbe1		Lingo1
Pdlim1		Mtus2
Shb		Crhr1
Six5		Rtbdn
Dlgap2		Ccdc184
Atic		Shisa7
E330011O21Rik		Jph3
St8sia3		Trp53i13
Rbfox3		Fam169a
Grb14		Tmem179
Adamts14		Grin2a
Cyp4v3		Pdgfa
Pde11a		Adrb1
Tspo		Mir124a-3
1700063D05Rik		Dnajc22
Rreb1		Kcns1
Uaca		Kcnc4
Cmtr1		Comp
Gm17830		Isl2
Elavl2		Gjd3
Il20ra		Tunar
Gm9833		Sidt1
Has2os		Cfc1
Dennd3		Gnas
Gm1587		Sparc
Egfem1		Vstm2l
B3gat1		Rras
Gad1os		Ptpn18
B3gat1		Sncb
Bcat1		Vgf
Slc19a1		Paqr9
Prelid2		Set
Dse		Uts2r
Ifih1		Zfyve28
4933400L20Rik		Fam241a
Epb41l2		Kcnj9
Hexb		Runx2
Mroh5		Sorl1
Bcat1		Arl10
Gm29571		Maff
4933400L20Rik		Tgfbr3
Pantr2		Gm9899
Pam		Shroom3
Mir8120		Jazf1
Htr1f		Fam81a
1700029F12Rik		Zfp354b
Jam2		Syt2
Inppl1		Ablim2
P2ry1		Nos1
Dapk1		Tjp3
Tgfbr2		Myo1d
Erich2		Gm14207
Neto1		Rac3
Cttnbp2		Dlk2
Vcan		Cbx8
Pvt1		Chrna4
Stxbp6		Epb41l3
Disp1		Gm14207
Rgs12		Srrm3
Acaa2		Pou2f2
Rgs20		Pnoc
Tgfb2		Nfic
Tox3		Epor
Flrt2		Adap1
Eif4ebp1		Ddn
Has2		Cyb561
Phldb2		Cacna1c
Kirrel		Sptbn4
Evc		Cntfr
Rgs20		Slc26a8
Palld		A530013C23Rik
Nfatc4		Cacna2d2
Slc1a5		Eml6
Kalrn		1700007K13Rik
Pcgf5		Lsm14b
Tcf7l2		Syt4
Pcgf5		Abhd6
Tgfbr1		Adap1
Tcf7l2		Bcl2l11
Rtl9		Spry1
Eda		Atp1a3
Alcam		F3
Gyg		Heyl
Mbp		Fut1
Etl4		Fa2h
Gbp5		Stac2
Stambpl1		R3hdm4
Tnfrsf1a		Fzd9
Tgfb2		Scube3
Itih5		Npas2
Ppic		Sphk1
Mmp14		Chrna4
Mdfic		Htr6
Rgs20		Hes5
Pcgf5		Prob1
Mir574		Tesc
Efs		Itpk1
Dctd		Gchfr
Itpr2		Lif
1700012A03Rik		Csrnp1
Arhgap32		Kcnb1
Mir99ahg		Cspg5
Pif1		Lipt1
Rab27b		Mrps23
Rbms3		Runx1t1
Igdcc3		P4ha3
Tmcc3		Rarg
Myc		Rab11fip4
Celsr1		Cplx3
Pld5		Itga3
Rasgef1b		Ndrg4
Rhoj		Kcnk15
Eogt		Spryd4
Cttnbp2		Tunar
Gbp5		Klf5
Kdr		Lrg1
Rasgef1b		Thy1
Khdrbs3		Hr
Ppm1e		Pheta1
Klf12		Dctn3
B3gat1		Prmt8
Ppm1e		Cacna1d
Tcf7l2		Bmp6
Dmrta1		Zfp64
Pou3f3		Hapln2
Acan		Elmod1
Rhoj		Mapkapk3
Adamts1		Smug1
Elavl2		Crlf1
Aldh1b1		Prrx2
Cdh11		Mlxipl
Sorcs1		Kdf1
Igf2bp3		Tph1
Slc12a7		C1qtnf1
Crim1		Scube3
Vangl1		Ebi3
Adam12		Gfra4
Vrk1		2310030G06Rik
Pard3		Actn1
Rbm24		Efnb3
Kdr		Lpin3
Pcdh18		Cgas
Sfrp2		Gabbr2
Hk2		Cux1
Vangl1		Ssbp4
Pard3		Pde4a
Slc24a5		Sgk1
Gm9833		Slc22a23
Zfp36l2		Kcnh6
Dhrs3		Cmklr1
Mir6394		Add3
Dnah8		Gpr158
Tpd52l1		Bmf
Itga4		1700016K19Rik
Il22ra1		Ntm
Pvt1		Gm5617
Adamts14		Mir193a
Pcdh15		Bdh1
Cbfa2t3		Sfmbt1
Flrt2		Smarca2
Tgif2		Psd
Pcgf5		Gadd45b
Ntng1		Cyp1a1
Fgfr2		Ssh2
Samd5		Gfod1
A930003O13Rik		Grm5
Mir100hg		Lrp1
Rab31		Klhl21
Cdc20b		Bhlhe41
Phactr3		Sfrp5
Dnah8		Mgat4a
Sh3pxd2b		Clip1
Limch1		Egr1
Sgpp2		Junb
Igf2bp3		H2-L
Pcgf5		Ablim1
Tmem121b		Nags
Galnt18		Dhh
Cdc42ep4		Rap1gap
Cmpk2		Tesc
Togaram2		Bcl2
Frmd4b		Hrk
Slc26a4		Itpr3
Grid2ip		Gm12339
Rassf2		Tesc
Nmnat3		Adamtsl5
Gli3		Hspa1b
Ptprm		Rps6ka1
Rit2		Galnt9
Zdhhc25		Zbtb7a
Efcab6		Dnm3
Adamts17		Foxa3
Prss51		Emilin3
Mir100hg		1190005I06Rik
Mir1932		Ptges
Egflam		Rasal1
Gm20744		Kank3
Nhsl1		C2cd4a
Chn1		Stc2
Fah		Cbx2
Ppm1e		Eml2
Mtus1		Arhgef15
Pde1c		Tmem108
Sh3rf1		Pkp2
Noxa1		Mir7240
Gm11217		Ngb
Rims2		Arhgef15
Lpp		Agap3
Rgs3		Gipc3
Svil		Eif2b5
Svil		Slc16a3
Adamts17		Lag3
P3h2		Zfp541
Acaa1a		Golph3
Cdc42ep4		Agbl2
Ptprm		Fos
Pcgf5		Rapgefl1
Galnt18		Apoa5
Adgrd1		Ppp3cc
Parvaos		Dkkl1
		4933428G20Rik
		Col11a2
		Snta1
		Prox1
		Cacna1g
		Ache
		Catsperz
		Lrg1
		Runx1t1
		Eral1
		Kcnk4
		Ssbp4
		Adrb2
		A730018C14Rik
		Klf15
		Plxdc1
		4933417D19Rik
		L1td1
		Rhod
		Trank1
		Slc17a9
		Plvap
		Ccdc87
		Rph3a
		Gm12992
		Sec31b
		Mypop
		Cds1
		Myo7a
		Cyp46a1
		Psmb8
		Zbtb8b
		Zfp385a
		Bola1
		Gpbp1
		Ttc34
		Pnoc
		Vamp8
		Lmod1
		Nt5c1a
		Zc3hc1
		Chrdl2
		Acta1
		Gadd45b
		Lepr
		Epas1
		Mal
		Actn1
		Bhlhe41
		Fndc5
		Epb41
		Cbx7
		Nr4a3
		Utp11
		Gramd2
		Gtf2f2
		Eml2
		Zbtb40
		Tubgcp3
		Sybu
		Aifm3
		Lztr1
		Ptpra
		Pomc
		Dpm3
		Des
		Pnmt
		Ntrk3
		Rpl26
		Arhgap45
		Gm4349
		Abcc3
		Usp2
		Gnmt
		Gm23450
		Efhd1
		Dgkz
		Mettl9
		Nppb
		Lrrc23
		Zbtb7a
		Lrrc24
		Ncf1
		Sparc
		Fam98c
		Mmp9
		Sipa1l1
		Tacc2
		Zfyve27
		Ptbp3
		Zfp974
		Mir6347
		4930404N11Rik
		Ciz1
		Sgk3
		Ciz1
		Pcolce
		Rassf1
		Ptprn
		Shank3
		Capn12
		Eml2
		Ggn
		L3mbtl1
		Hivep3
		Ptger1
		Vsig10l
		Tmprss9
		9130019P16Rik
		Atxn1
		Sptbn4
		Sdk1
		Foxo1
		Srarp
		Kdm2b
		BC049715
		Rassf5
		Pheta2
		Nfe2
		Pdlim7
		Tmod1
		Smco3
		Ciz1
		Pcsk2os1
		Cnn2
		Taok3
		Myo5c
		Helz
		Cep170b
		Apol8
		Sgcb
		Ccdc116
		Abhd3
		Ssh3
		Pheta2
		Pitpnm1
		Mir1966
		Usp2
		Plcb3
		Usp35
		Meioc
		Cacna1i
		Hic1
		Shroom1
		Rab37
		Adora1
		Plxdc1
		Cpne2
		Rgl3
		Hspa1a
		Foxa3
		Pde4a
		Atp1b1
		Mllt6
		Ccdc183
		Ngrn
		Csrnp1
		Lratd1
		Afap1l2
		Stxbp2
		Map7
		Orai3
		Fndc5
		Stxbp2
		Trp53cor1
		Prss33
		Stx3
		Foxq1
		Fgf18
		Kcnk3
		Rnf39
		Dysf
		Efcc1
		Mrc2
		Synj2
		Car14
		Lrp8
		Stk32c
		Pcsk2os1
		Slc25a41
		Dkkl1
		Srrm2
		Ttll3
		Setdb1
		Stap2
		1700124L16Rik
		Gpr4
		Fbxo25
		Ap1s3
		Slc35c1
		Klf5
		Bhlha9
		Plk2
		Ell3
		Kif26b
		Nanos1
		Fosl1
		Mospd4
		Col7a1
		4930594M22Rik
		Sh2b3
		Tbc1d14
		Cpne2
		Fignl2
		Rcan1
		Srms
		Wnt2b
		Lsr
		Agap3
		Nr4a1
		Kcnk12
		Col8a2
		Dgkz
		Bhlhe40
		Tead4
		Itpr3
		4933428G20Rik
		Efcc1
		Zfp296
		Cracr2b
		Crabp2
		Myadml2
		A930018P22Rik
		Tbc1d2
		Nbeal2
		Rgs8
		Vwa1
		Scd1
		Macir
		Kirrel3
		Cyrib
		Lix1l
		Dnm1
		B4galnt1
		Cacna2d2
		Bmp6
		Qprt
		Mir219a-2
		Ccdc106
		Mtus2
		Stx3
		Rora
		Npas4
		0610040F04Rik
		Stxbp2
		Misp3
		Smarca2
		Peli3
		Slco3a1
		Lck
		Rasal1
		Dtx4
		Gpr4
		Denn2b
		Tnrc6c
		Catsperd
		Mapk11
		Gm11762
		Atp6v1fnb
		Ubald2
		Cacna1i
		Gm14207
		Srd5a2
		Scube3
		Rph3a
		Irf2bpl
		Tmem179
		Kcnk4
		Fkbp11
		Hexim1
		Ptp4a2
		Htr6
		Gpbp1
		BC049715
		Ccdc87
		Zfp36
		Npb
		Sipa1l1
		Tmem189
		Zg16
		Cacna1a
		Degs2
		Slc4a11
		Osbpl6
		Rras
		Arhgef5
		Ccdc61
		Mesp1
		Mfsd7a
		Mical3
		Itga3
		Nfe2
		Add3
		Tatdn2
		Tekt2
		Gins1
		Morf4l1
		Erbb2
		Pik3cd
		Wiz
		Cyp1a1
		Leng9
		Kifc1
		Slc35a3
		Ablim1
		Trp73
		Bdh1
		Kifc5b
		Actn3
		Ccsap
		Taok3
		Ccer2
		Shc4
		Chpf2
		Mast1
		Nodal
		Six4
		Epb41l1
		Doc2b
		Car14
		Gipc3
		Bcl2l11
		Igsf9b
		Gm11729
		Gm266
		Rara
		Six4
		Ltbp4
		Ttc7
		Gm11729
		Slc6a4
		Nrxn2
		Galr3
		Runx1t1
		Hrh3
		Tmem132d
		C130026L21Rik
		Prmt8
		Wif1
		Psmd5
		Galr2
		Hcn4
		Tnrc6c
		Flt3
		Adamts2
		Slc41a2
		Grin2b
		Nr6a1
		Pitpnm3
		Nanos1
		Chst11
		Kcnc3
		C2cd4b
		Rims4
		A330033J07Rik
		Rtbdn
		Mrps23
		Runx1
		Gm23284
		Spock2
		Dbndd1
		Lingo1
		Ust
		2210416O15Rik
		Slc4a4
		Neto2
		Asb1
		Ascl4
		Lsm14b
		Pafah2
		Fbll1
		Sntb2
		Hes7
		Zfp541
		Atl2
		Shkbp1
		Mir193a
		Camkk1
		Pcdh7
		Maco1
		Clcn4
		Gadd45b
		Ephb3
		Meg3
		Espn
		Tub
		Camk2b
		Pitpnm3
		Duoxa1
		Napsa
		Csmd2
		Lamb3
		Maco1
		Caly
		Inf2
		Bmi1
		Aqp11
		Dok4
		Gpr6
		Frs2
		Gp5
		Ttc9
		Dlg2
		Marchf11
		Tbc1d2
		Tacc2
		Efnb2
		Myrip
		Prox1
		Cbx4
		Sik1
		Frat1
		Acta1
		Col11a2
		Slc4a4
		Gpr12
		Dbndd1
		Pde2a
		Cbx2
		Crhr1
		Myadml2
		Lingo1
		Pitpnm1
		Lingo1
		1700020L24Rik
		Bhlha9
		Zfyve28
		Prickle3
		Cacna1e
		Marchf11
		Slc35f3
		Zbtb46
		Chn2
		Aqp11
		Pou2f2
		Pipox
		Hivep3
		Ebf4
		A930016O22Rik
		Panx2
		Lin28b
		Adamts8
		9430021M05Rik
		Csmd1
		Cdk5r2
		Adamts8
		Epha8
		Adamts8
		Fgf5
		Bend4
		Rtbdn
		Atp7b
		Gdf9
		Tmem189
		H2-L
		Pde4d
		Bmp8a
		Ptpn18
		Kcnab3
		Ccdc112
		Prrt1
		Armc8
		Apol8
		Ldlrap1
		Asl
		Pkp2
		Cdc42
		Arl9
		Galnt10
		Pipox
		Fmnl1
		Sigirr
		Ccnb1ip1
		Gm8439
		Zfp821
		Sox30
		Pianp
		Ciart
		Tub
		Adcy5
		Tpm2
		Hnf1a
		Mal
		Mab21l2
		Fam166b
		Csmd2
		Zfp850
		Mical3
		Mfsd4a
		Rpl3l
		Mipep
		Phf10
		Ankrd6
		Plvap
		Proc
		Zmynd15
		Spink8
		Cys1
		4430402I18Rik
		Pde4c
		C2
		Tdrd7
		Atp13a2
		Bcl3
		Fabp4
		Tdrd7
		Nr4a1
		Scd1
		Cebpa
		Tekt2
		Taok3
		Ctif
		Mipep
		Cfi
		Pde4b
		Ccdc3
		Ccdc88c
		Tmem184a
		Pip5kl1
		Pvr
		Ret
		Cacna1c
		Gpatch4
		Ifi30
		Aopep
		Des
		Sipa1
		Lrrd1
		Cbx4
		Fam98c
		Pygb
		Bbc3
		Slc51a
		Plxnd1
		Trim47
		Zhx2
		Hmgn1
		Pls1
		Slc7a8
		Mras
		2810459M11Rik
		Socs1
		Lrrc23
		Kif26b
		Gal3st4
		Tm6sf2
		Fads6
		Cyp1b1
		Chadl
		Kcnq4
		Rnf39
		Adra1d
		Bglap
		Exoc3l4
		Dab1
		Ap2a2
		Zhx2
		Slc35c1
		Cldn6
		Paqr6
		Cdc37
		Tbx21
		Atp8b3
		Smarcd3
		Tdrd7
		Mpzl3
		Sytl2
		Tbx10
		Denn2b
		Krt18
		Cavin1
		H2-Q10
		Thbs3
		Ptpn18
		Bst2
		Slc7a7
		5430431A17Rik
		Bhlhe41
		Golph3
		Htatip2
		Smpd5
		2200002D01Rik
		Capn12
		Tepp
		Capg
		Cnn1
		Cnn1
		Mospd4
		Ltk
		Taok3
		Slc12a9
		Oas3
		Fam83c
		Ano9
		Cbx4
		Speg
		Myo15
		Zfp703
		Cbx4
		Plec
		Mir3572
		Rictor
		Snta1
		Sgsm2
		Coa3
		Avpi1
		Kcng3
		Kcnn1
		Wnt6
		Slc26a10
		Cacna1h
		St8sia5
		Pitx3
		Iqsec1
		Rgcc
		Rassf5
		Foxc2
		Bhlhe41
		Lmo1
		Gas7
		Gas7
		Fgf12
		Iqsec1
		Pcdh1
		Mmp15
		Hdac11
		Snai1
		Csrnp1
		Iqsec1
		Plaur
		Slfn5
		Tnxb
		Sema5b
		Irf6
		Ppl
		Cebpd
		Speg
		Krt8
		Gsc2
		Igf2bp2
		Cdx1
		Fignl2
		Pdgfb
		Prph
		H2-K2
		Rara
		Trim47
		Nkx2-2os
		Prkcz
		Fxyd5
		Insyn1
		Fam189a2
		Obscn
		Cdx1
		Iglon5
		Tnxb
		Pdlim2
		Kcnb1
		Kcnb1
		Nab2
		Gng13
		Tgfb1
		Wnk4
		Mpzl2
		Cys1
		Sp7
		Nphs1os
		Exoc3l2
		Tgfb1
		Cldn7
		Drd4
		Tnxb
		Cgnl1
		Eya2
		Mlxipl
		Mmp11
		Krt19
		Marveld2
		Sall2
		Gsc2
		Cd52
		Krt18
		Arhgef15
		Il11
		Cd14
		Zc3hav1
		Spint1
		Pcsk1n
		Adm
		Pld2
		Tnxb
		Htra4
		Tor4a
		Rybp
		Esam
		Heyl
		Ccdc194
		Gipr
		Grm6
		Prmt8
		Rtn4rl2
		Lad1
		Begain
		Exoc3l4
		Eya2
		Tcea3
		Cgas
		Itpripl2
		Runx1
		Tcea3
		Itpripl2
		Slc7a10
		Cgas
		Ildr2
		A4galt
		Fam187b
		Tcf24
		Rprml
		Nos2
		Ppl
		Smoc2
		Prrx2
		Grrp1
		Fxyd5
		Rara
		Foxo1
		Otud7a
		Ccnd1
		Cpm
		Sox10
		Oxt
		Shank2
		Rgs8
		Elf4
		Kcnip3
		Cbx7
		Cpeb1
		Ppp1r1b
		Prrx2
		Golga7b
		Palm3
		Mxra8
		Slc35c2
		Cacng6
		She
		Best2
		A230077H06Rik
		Oaf
		Kcnip3
		Pvr
		Gas2l1
		Obsl1
		Castor1
		Npw
		Slc16a11
		Bcl6b
		Pcdh1
		Iqank1
		Sipa1
		Tinagl1
		Rnd1
		Zfp385a
		Slc4a11
		Oxt
		Kcnn1
		Chad
		Prss36
		Ankrd34a
		Tgfa
		Tsks
		Mxra8
		Mfsd4a
		Phospho1
		Slc26a10
		Ckmt1
		Bhlhe40
		Gp5
		Ttyh1
		Itpka
		Leng9
		Qprt
		Rgs8
		Pdgfb
		Itgb5
		Stx3
		Ephb4
		Casz1
		Iqank1
		Rnd1
		Mmp9
		Pkp2
		Wdr86
		Gadd45b
		Grin2c
		Col16a1
		Speg
		Rtn4rl1
		Rara
		Fxyd1
		Tgfa
		Kcnk6
		Col13a1
		Gm9899
		Phactr3
		Rybp
		Ntrk3
		Nab2
		Sfn
		Des
		Speg
		A4galt
		Llgl2
		Kcnk3
		Zbtb42
		Pdxk-ps
		Cx3cl1
		Tspan9
		Speg
		Disp3
		Bcl3
		Mmp9
		Cdh22
		Cacna1h
		Il11
		Klf15
		Igf2
		Optc
		Gm11186
		3300002P13Rik
		Ocln
		Cnn2
		Jsrp1
		Atcayos
		Slc5a5
		Foxo1
		Ptpn3
		Itgb3
		Ankrd34a
		Degs2
		Car14
		Chadl
		Kcnn2
		Pltp
		Galr3
		Gpr12
		Ebf4
		Kcnb1
		Gm49890
		Pdgfa
		Syt2
		Itga5
		Crb3
		Tuba4a
		Foxh1
		Mmp23
		Fabp3
		Car11
		Rps6ka1
		Cnn1
		Spata2l
		Cbx7
		Kcnk12
		2210408F21Rik
		B4galnt1
		St8sia5
		Slc12a5
		Kcnq4
		Bhlhe41
		Adra2b
		Grrp1
		Tgfb1
		Nr4a1
		Afap1l2
		Ablim1
		Lrp8
		Tuba4a
		Kif17
		Tmc5
		Pipox
		Plxna1
		Myrip
		Rtn4rl1
		Ankrd34a
		Bhlhe41
		Irs3
		9430041J12Rik
		Slc22a4
		Cpeb1
		Best2
		Nebl
		Npr1
		Matk
		Il4i1
		Lrrc23
		Lrrc75b
		Cbx4
		Spon1
		Cbarp
		Kazn
		Gabrd
		Tesc
		Crb3
		P4ha3
		Krtcap2
		Tcerg1l
		Irf6
		Gm23363
		Cdon
		Dusp9
		Slc16a8
		Ccdc106
		Eva1b
		Clcf1
		Col8a2
		Cst6
		Mir7088
		Srrm3
		Arhgef15
		Wnt2b
		Plek2
		Icam1
		Mgat5
		Sparc
		Cnn1
		Eno2
		Pheta2
		Cnep1r1
		Ppargc1b
		Mmp9
		Rtkn
		Smim17
		Arhgap9
		Cldn7
		Adra1a
		Smagp
		Nags
		Exoc3l4
		Rnf207
		Arhgef16
		Fosl1
		Pdgfa
		Myadml2
		Dpf1
		Gm16136
		Cdh22
		Otop1
		Nags
		Hs3st6
		Wnt10b
		Bcl3
		Sema5b
		Cdh1
		Zfp36
		Egr3
		Tulp1
		Cpne2
		Ltbp4
		Stat6
		Dnm1
		Aebp1
		Trim25
		Fgf8
		Ncmap
		Rgs8
		P4ha3
		Scn1b
		Mmp23
		Oprd1
		Fam83f
		Comp
		Klf2
		Icam1
		Wnk4
		Coro6
		Prss36
		Slc26a10
		Gsc2
		Pcsk1n
		Lhb
		Icam1
		Matk
		Ahr
		Cdc14b
		Olfm2
		Nemp1
		Myo15
		Cyp27b1
		Ocln
		Stx3
		Hspb1
		Nodal
		Adap2
		Klf2
		Rgs16
		Cdx1
		Npr1
		Oxct2a
		Cds1
		Zfp853
		Pde4a
		Krt8
		Gimap1
		Shank1
		Kbtbd13
		Slc45a3
		Lamc2
		Gpat3
		Kcna6
		Sigirr
		Tgfb1
		Rpp25
		Krt19
		Col26a1
		Ifnlr1
		Drd2
		Tcea3
		Adam33
		Rem1
		Fxyd5
		Ccdc194
		Slc30a2
		1810019D21Rik
		Fgf18
		Lbx2
		Lor
		Psmb8
		Rbm46
		Rbm20
		Ifnlr1
		Pex5l
		Tmem74b
		Fgf15
		Sulf2
		Ankrd6
		Scnn1b
		Pitx3
		Kalrn
		Cacna2d2
		1810019D21Rik
		Rara
		Rhbdf1
		Hspa1a
		Hapln2
		Cracr2b
		Rnd1
		2900026A02Rik
		Flt3
		Creg2
		Cebpa
		Cpne7
		Tmem221
		Alox8
		Galr2
		Gpr4
		Svep1
		Gpat3
		Cdh3
		Plekhd1
		Zfp648
		Gjb1
		Mir7240
		Lin28a
		Epo
		Cavin1
		Dab1
		Ripk4
		Arid3c
		Dact2
		Npas2
		Kcnk4
		Adm
		Hhipl1
		Tdrp
		Zfp385a
		Eml2
		Mmp9
		Rgs9bp
		Ucp1
		Tpm1
		Thbs3
		Gadd45b
		Usp2
		Arhgef39
		Ccdc106
		Cyrib
		Fstl4
		Maf
		Bcl2
		Nod1
		Sys1
		Dbndd2
		Disp3
		Speg
		Cbr3
		Gm15179
		Tnxb
		Sall2
		Rgs10
		Mir7055
		Rbpjl
		Mpz
		Atp2a3
		Trank1
		D030068K23Rik
		Sox10
		Tgfa
		Rgl1
		Prr15l
		Helz
		Gm30539
		Pkp2
		P2rx5
		Prr15l
		Myof
		AW011738
		Prss8
		Shfl
		Ptk2b
		Fam83g
		Gnas
		Exoc3l4
		Spint1
		Mmp9
		Tulp1
		Wdr86
		Gpat3
		Mir219a-2
		Rgl3
		Oxct2b
		Chd5
		Ptpru
		Cpne2
		Gas6
		Wnt2b
		Gal3st1
		Wnt7a
		Ltk
		Slc2a1
		Shisa7
		Plvap
		Mcam
		Cdkn1a
		Kazn
		Csrnp1
		Sox30
		Fndc3b
[truncated: 469 more rows]

## Sheet: Figure S8D
Up		Down
Phf3		Rgs20
Nbeal1		Sulf1
Tuba4a		Msc
Speg		Slc9a2
C130026I21Rik		Pantr2
Trpm8		Gulp1
Asb1		Vwc2l
Hdlbp		Apol7d
Insig2		Obsl1
Actr3		Epha4
Adora1		Serpine2
Edem3		Arl4c
Suco		Ankmy1
Kifap3		Bok
Parp1		Pam
Cdk19		Cdh20
Cep85l		Gm17634
Dux		Gli2
Gm4981		Dpp10
Lims1		Cxcr4
Pcbp3		Thsd7b
Cdc34		Rassf5
Bsg		Plekha6
R3hdm4		Nek7
Cnn2		Hmcn1
Btbd2		Rxrg
Jsrp1		Itpkb
Zbtb7a		Tmem63a
Gipc3		Cnih3
Zfp433		Capn8
Fhl4		Tgfb2
Cry1		Ptpn14
Atp2b1		Sash1
Gm4301		Phactr2
Zfc3h1		Adgrg6
Rab3ip		Nhsl1
Ctdsp2		Slc35d3
Rab5b		Enpp1
Pisd-ps1		Gm36908
Sfi1		Dse
Tug1		Prdm1
Gck		Gm15934
H2az2		Slc35f1
Rab1a		Man1a
Ublcp1		Gja1
Fnip1		Adamts14
Drg2		Tet1
Ubb		Egr2
Eif4a1		Bicc1
Slc16a11		Col18a1
Pld2		Btbd11
Mettl16		Ascl1
Inpp5k		Ano4
Cacna1g		Rmst
Cdk5rap3		Elk3
Hsd17b1		Tmcc3
Meioc		Grip1
Map3k14		Mir763
Smurf2		Msrb3
Wipi1		4930432O09Rik
Usp36		Rassf3
Pde6g		Tafa2
B3gntl1		Vwc2
Ubxn2a		Cobl
Arhgap5		Commd1
Srp54a		Vrk2
Fntb		Stk10
Glrx5		Kcnmb1
Cdc42bpb		Adra1b
Tdrd9		Sgcd
Cdca4		Tcf7
Sp4		Glra1
Dip2c		Gria1
H3c10		Pmp22
H3c11		Gas7
H2bc23		Ntn1
H3c8		Rhbdl3
H3c7		Unc45b
H3c6		Ppm1e
H3c4		Nog
H3c3		C1ql1
H3c1		Fam20a
Scgn		Cdc42ep4
Nup153		Syngr2
Hnrnpa0		Mir1932
Zfp738		Ntsr2
Ipo11		Gm20187
Il31ra		Pxdn
3110070M22Rik		Hdac9
Hmgcs1		Stxbp6
Rpp14		Prkd1
Pdhb		Npas3
Nr1d2		Mdga2
Adk		Kcnh5
Ghitm		Rhoj
Pnp		Plekhg3
Rnase2a		Zfp36l1
Chd8		Mideas
Cdh24		Ston2
Mtmr6		Flrt2
Kpna3		Fbln5
Ints6		Rin3
Ppp3cc		Vrk1
Phyhip		Begain
Tpt1		Mir203
Cln5		Itgb8
Gpr180		Tmem196
Pcca		Adarb2
Lmbrd2		Gng4
Zfp706		Gli3
Gm16136		2610307P16Rik
Azin1		Mboat1
Dcaf13		Ppp1r3g
Oxr1		Rreb1
Derl1		Gmpr
Trappc9		Syk
Chrac1		Cxcl14
Foxh1		Dapk1
Lrrc24		Adcy2
Eif3d		Slc12a7
Galr3		Ell2
Pla2g6		Vcan
Mief1		Lhfpl2
Atf4		Sv2c
Adsl		1700029F12Rik
Cyp2d10		Enc1
Tmem106c		Fgf10
Spats2		Gm3002
Sp1		2610042L04Rik
Nfe2		Gm3411
Zfp385a		Arhgap22
Hmox2		Gdf10
Rogdi		Grid1
Prm1		Samd4
Txndc11		Mmp14
Zc3h7a		Ajuba
Xxylt1		Efs
Kpna1		Nfatc4
App		Shisa2
Scaf4		Tnfrsf19
Hlcs		Dock5
Zdhhc14		Gm10845
Ppp2r1a		Spertl
Noxo1		Klf12
Rps2		Lmo7
Baiap3		Ednrb
Ergic1		4930556M19Rik
Nelfe		Gm5144
Hspa1b		Npr3
Hspa1a		Pdzd2
Abcc10		Fbxl7
Oard1		Matn2
Fem1a		Oxr1
Fer		Sntb1
Vapa		Has2os
Socs5		Fbxo32
Msh6		Myc
Gm1976		Pvt1
Arhgap12		Asap1
Stard4		St3gal1
Pcdhgc3		Khdrbs3
Pcdh1		Dennd3
Fem1c		Mpped1
Ccdc192		Efcab6
Slc6a7		Celsr1
Aldh3b3		Cpne8
Ccdc87		Pdzrn4
Fosl1		A330009N23Rik
Ccdc85b		Litaf
Fau		B3gnt5
Atg2a		BC106179
Kcnk4		P3h2
Zfp91		Fgf12
Carnmt1		Kalrn
Fam122a		Mylk
Ubtd1		Arhgap31
Kazald1		Phldb2
Fgf8		4930542D17Rik
Add3		St3gal6
Cacna1b		Epha6
Ajm1		Htr1f
Tmem250-ps		Vgll3
Set		E330011O21Rik
Gm23363		Chodl
Pbx3		Mir155hg
Phospho2		Jam2
Fnbp4		Adamts1
Dgkz		Adamts5
Prdm11		Tiam1
Cd44		Eva1c
Kif18a		Rgmb
Duoxa1		Tead3
Mrps5		Mdga1
Cds2		Slc37a1
Plcb4		Rcan2
Kiz		Tfeb
Apmap		Lrfn2
Mapre1		Daam2
Raly		Satb1
Nfs1		Ptprm
Top1		Lama1
Plcg1		Alk
Slc12a5		Crim1
Stau1		Pkdcc
Actl6a		Zfp36l2
Pgrmc2		Map3k8
Cog6		Jcad
Med12l		Gm10556
Tiparp		Svil
Pdcd10		Gm26682
Rrnad1		Colec12
Paqr6		Rnf125
Bglap2		Mapre2
Bglap		Rit2
Tpm3		Kctd16
Npr1		A330093E20Rik
Ankrd34a		C030005K06Rik
Notch2		Ppic
Ppa2		Fbn2
Trmt10a		Adamts19
Mdn1		Atp8b1
Dnaja1		Ccbe1
Rnf38		Zbtb7c
Tdrd7		Mir6358
Kdm4c		Neto1
Gm13276		Cpt1a
Pik3r3		Rps6ka4
Mycbp		Gldc
Col8a2		Prkg1
Smim12		Stambpl1
Zbtb8b		Ch25h
Epb41		Pcgf5
Rps6ka1		Plce1
Stmn1		Pdlim1
Srsf10		Crtac1
Htr1d		Sh3pxd2a
Sdhb		Sorcs3
Pgd		Sorcs1
Errfi1		Tcf7l2
Klhl21		Adrb1
Sdf4		Gfra1
Rbm48		Hspa12a
Gm10354		Shtn1
Gm17019		Frmd4a
Gm21190		Camk1d
Gm21083		Proser2
Speer4d		Il15ra
4930572O03Rik		C1ql3
Speer4cos		Etl4
Speer4c		Pnpla7
Smarcd3		Nsmf
Bloc1s4		Rxra
Polr2b		Col5a1
Nudt9		Gm13547
Evi5		Phf19
Tesc		Lypd6
Por		Acvr1c
Epo		Grb14
Mepce		Cobll1
4930449I24Rik		Galnt3
Gm3409		Sp5
Stra8		Erich2
Tmem178b		Wipf1
Pdia4		Nfe2l2
Fkbp14		Pde11a
Serbp1		Slc43a1
Kdm3a		4930443O20Rik
Sema4f		Lrrc55
Dguok		Lrp4
Fam136a		Tspan18
Gmcl1		Prr5l
Gfpt1		Bdnf
Frmd4b		Fbn1
Gapdh		Rassf2
BC049715		Jag1
Cmas		Bfsp1
Vmn2r29		BC039771
Eml2		Zfp217
Gm38499		Cbln4
Ppm1n		Pmepa1
Fosb		Car2
Klc3		Nlgn1
Zfp974		Spata16
Paf1		Mecom
Ggn		Fat4
Fxyd7		Pcdh18
Car11		Wwtr1
Tmem135		P2ry1
Pcf11		Arhgef26
Pgm2l1		Mme
Arap1		Ptx3
1700012D14Rik		Sfrp2
Zp2		Kirrel
Ndufab1		Tchh
Zkscan2		Acp6
Prss8		Tent5c
Ptdss2		Vangl1
Cracr2b		Tspan2
6820431F20Rik		Vav3
2610005L07Rik		Ntng1
Gm21119		S1pr1
Msmo1		Gpr88
Myo9b		Palmd
Tmem221		Mir137
Colgalt1		Pde5a
Tpm4		Mcub
Smarca5		Npnt
Rtbdn		Slc39a8
Siah1a		Bmpr1b
Cpne2		Gbp7
1810019D21Rik		Ccn1
Nob1		Ddah1
Glg1		Nexn
Tmem231		Penk
1700030J22Rik		Tox
Mlycd		Mob3b
Sipa1l2		Pax5
Tarbp1		Shb
Mir101c		Aldh1b1
Smarca4		Igfbpl1
Hspa8		Tgfbr1
Hoatz		Klf4
Cyp1a1		Lpar1
Mthfs		Whrn
Pik3cb		Pappa
Rnf123		Frem1
Cdc25a		Ttc39b
Map4		Bnc2
E330016L19Rik		Dmrta1
Tsix		Elavl2
Scml2		Dab1
Asmt		Plpp3
Erdr1		Glis1
		Pou3f1
		Map3k6
		Nbl1
		Lrrc38
		Dhrs3
		Cdk6
		Prkag2
		Evc
		Prom1
		Slit2
		Kcnip4
		Lgi2
		Nwd2
		Mir574
		Pdgfra
		Kdr
		Igfbp7
		Adamts3
		Parm1
		Stbd1
		Bmp3
		Rasgef1b
		Scarb1
		Stx2
		Fam20c
		Pon2
		Nxph1
		Cav1
		Met
		Cttnbp2
		Gpr37
		Zfp800
		Ccdc136
		Smo
		Podxl
		Parp12
		Igf2bp3
		Tril
		Atoh1
		Ndnf
		Tcf7l1
		Eva1a
		Hk2
		Klf15
		Grip2
		Frmd4b
		Pdzrn3
		Grm7
		Wnt5b
		Tmem121b
		Tspan9
		Emp1
		Itpr2
		Tmtc1
		Tmem238
		Slc1a5
		Six5
		Cebpa
		Luzp2
		Pcsk6
		Adamts17
		Rgma
		St8sia2
		Mfge8
		Cpeb1
		Adamtsl3
		Prss23
		Gm15412
		Tenm4
		Tpbgl
		Inppl1
		Scube2
		Galnt18
		Mical2
		Parva
		Sox6os
		Gsg1l
		Plpp4
		Tacc2
		Htra1
		Adam12
		Dock1
		Insyn2a
		Foxi2
		Pwwp2b
		Ccnd1
		Dlgap2
		Tacc1
		Eif4ebp1
		Cldn23
		Dlc1
		Slc7a2
		Mtus1
		Sh3rf1
		Palld
		Spock3
		Nr3c2
		Gm10649
		Tox3
		Mt2
		Mt1
		Cdh11
		Wwox
		Maf
		Kcng4
		Pard3
		Smco4
		Fat3
		B3gat1
		Ubash3b
		1700063D05Rik
		Mir100hg
		AI593442
		Rbpms2
		D430036J16Rik
		Tent5a
		Adamts7
		Spsb4
		Clstn2
		Cpne4
		Stac
		Osbpl10
		Tgfbr2
		Klhl40
		Gpc3
		Eda

## Sheet: Figure 7D
Upregulated	DIV1-5	Downregulated		Upregulated	DIV3-5	Downregulated
Cdkn2a		Epb41l1		Idi1		Map1b
Cd300lf		Zic1		Ptx3		Itm2b
Tnfrsf26		Rtn1		Fdft1		Soga1
Hpgd		Atp1a1		Il1rn		Zic2
Galr1		Acap3		Plaur		Mtss1
Padi2		Atp1a2		Hmgcs1		Cnr1
Mmp12		Zbtb18		Mvd		Reln
Ptx3		Mtcl1		Hpgd		Sptbn1
Kif26a		Il16		Nsdhl		Rbm39
En1		Amph		Msmo1		Cpe
Pla1a		Rundc3a		Lgals3		Atp2a2
Mmp13		Cplx1		Stard4		Ncam1
Serpine1		Gabbr2		Mmp12		Ppp1r9b
Ebf3		Nrep		Fabp5		Srrm2
Ccl6		Scg5		Insig1		Tulp4
Flt1		Gabrb3		Dhcr24		Smg1
Lmcd1		Sv2b		Tinagl1		Tspyl4
Dok7		Nr1d1		Acat2		Arf3
Tmem154		Kcnj3		Plau		Calm2
Atp13a4		Lrrn2		Serpine1		Nbea
Ccl3		Spred2		Syk		Ncdn
Hs3st4		Camk2b		Ccl6		Rtn1
Il1rn		Klf9		Hmgcr		Rbm5
Cd36		Astn2		Sema3e		Cdk16
Clec7a		Zfp687		Cdkn2b		Foxo3
Cd300c2		St3gal5		Scd1		Syt11
Igsf6		Dlgap1		Padi2		Zbtb18
Ccl4		Sybu		Inhba		Zic4
Fabp4		H3f3a		Ass1		Rab6a
Zfhx3		Adgrb2		Adm		Fat2
Clstn2		Ttc9b		Cds1		Klhdc10
Fbln2		Pik3r3		Ldlr		Ncor2
Pappa		Dusp5		Rdh11		Cask
Epas1		Brinp1		Ccl3		Epb41
Ltbp2		Purb		Slc1a6		Pip5k1c
Igf2		Kcnk1		Atp6v0d2		Psip1
Itgb3		Camkk2		Pdp2		Lonrf2
Gpnmb		Atp6v1g2		Lss		Clstn1
Sema3e		Sptb		Pawr		Syne1
Pmaip1		Sptbn4		Cd36		Ntrk2
Tnfaip6		Tle3		Fos		Tmx4
Lgals3		Erc1		Ccn1		Ppp3r1
Cdkn2b		Dlg3		Cyp51		Atp1a2
Cds1		Ppp2r2c		Gabra2		Mxd4
Atp6v0d2		Clk1		Nagk		Ddx5
Csf2rb		Celf4		P2ry14		Rere
Itgax		Dot1l		Serpinb6b		Vamp2
Tnfsf15		Peg3		Npr3		Mapk1
Adm		Sult4a1		Sdf2l1		Ppp6r3
Cpeb1		Pan3		Hk3		Atp2b1
Hmga2		Mab21l1		Rprm		Aak1
Fabp3		Igsf9b		Fasn		Tprn
Hpse		Mapre3		Wnt9a		Acap3
Spp1		Eps8		Tm7sf2		Dennd5a
Slc1a6		Gprin1		Mylip		Ncoa2
Abca1		Stx1b		Ccl7		Raf1
Tinagl1		Nsf		Acsl3		Zcchc14
Ly9		Phlpp1		Fam129a		Ubr3
Plau		Porcn		Shisal1		Napa
Tmtc1		Nedd4l		Gpnmb		Nfix
Thbs1		Kifc2		Mvk		Lingo1
Fibcd1		Rph3a		Tnfrsf12a		Cipc
Ccr1		Srgap2		Csf2rb		Nfasc
Apol7d		Sema4c		Adra2c		Sesn3
Lpl		Chgb		Uap1l1		Elmo2
Lox		Adam22		Arsi		Cul3
Mycn		Mir124a-1hg		Wfdc17		Atp1b1
Fgf7		En2		Scg2		Lrrn1
Itga11		Trim62		Idh1		Mef2d
Frrs1		Zfand5		Fads2		Taok1
Ndrg1		Sh3gl2		Bhlhe40		Gria4
Fdft1		Olfm1		Cstb		Celf4
Serpina3h		Pnmal2		Slc16a3		Gria2
Gdf10		Cdkl5		Slc16a6		Smarca2
Fos		Spock1		Cpeb1		Cplx1
Mertk		Tmem151b		Ndrg1		Snap91
Ccl9		Khnyn		Csrp2		Pnisr
Fabp5		Atp2b3		P4ha2		Trim3
Bhlhe40		Gpm6a		Abca1		Zfp521
Ccn1		Syn2		Dhcr7		Luc7l2
Igf2bp2		Scn2a		Hsd17b7		Myt1l
Ccnd2		Rif1		AC161119.1		Zfhx2
Cyba		Fam131b		S100b		Zfr
Csf2rb2		Pcbp4		Rftn1		Nrcam
Mgp		Lrp8		Mmp3		Baz2a
Hrk		Ajm1		Sema3d		Myt1
Cspg4		Fnbp1		Capg		Vat1l
Hk3		Zbtb46		Tmeff1		Clock
Slc16a3		Ndrg3		Anxa3		Tial1
C1ql1		Atp8a1		Tyrobp		Nemf
Inhba		Dlgap3		Neat1		Diras2
Gpx3		Gabrb2		Ccn2		Kcnk9
Idi1		Cbln1		Mafb		Syn1
Arsi		Disp3		Crim1		Slc25a23
Plaur		Dixdc1		Mt2		Chka
Ctsl		Barhl2		Fbln2		Hdac5
Ptafr		Zfp219		Msr1		Snrk
Adamts5		Nap1l3		Gsto1		Trim2
Msr1		Fbxl16		Map2k6		Strbp
Wfdc17		Nefl		Ftl1		Cadps
Nrk		Fam19a5		Srebf2		Sf3b1
Pcdh19		Fbxo41		Vat1		Camta1
Synm		Rbfox1		Bri3		Arhgef7
AC161119.1		Pak1		Fads1		Elavl3
Enc1		Nhsl2		Ctsl		Top2b
Ccbe1		Asic2		Ier3		Mecp2
Slfn5		Atp1b2		Cd53		Sez6
Ccn3		Slc6a1		Timp1		Sptan1
Adamtsl1		Jarid2		Ltbp2		Atrx
Hmox1		Cdh7		Npc2		Asph
Rnf157		Dgkd		Rragd		Peg13
Arhgap25		Apod		Rps27l		Sult4a1
Tnfrsf1b		Alms1		Tagln		Slc15a3
Scg2		Tmem132a		Ddit3		Sv2a
Ccn2		Kcnd2		Sh3bp4		Tbc1d16
Dio2		Madd		Snx8		Arpp21
Npr3		Btbd3		Lilr4b		Prpf38b
Fam198b		Numbl		Epas1		Ncor1
Metrnl		Neurod1		Mid1ip1		Med13l
Rgs4		Cnksr2		Lox		Grk2
Thbs2		Slc32a1		Thbs1		Sesn1
Plin2		Mybph		Itgax		Atp1a3
Ucp2		Cadm3		Rex1bd		Stxbp1
Fn1		Rbfox3		Sqle		Cdh8
Fam210b		Kcnc3		Tnfaip2		Dnmt3a
Ass1		Usp46		Myl12a		Ank
Ptgs2		Trpm3		Csrp1		Ndst3
Xdh		Frrs1l		Myl9		Il16
Fcgr3		Grm4		Epha4		Sipa1l2
Actg2		Sema5b		Rnf157		Smarcd3
Map2k6		Lgr5		Igfbp7		R3hdm4
Hmcn1		Gpr158		Cnn2		Dclk2
Vsir		Dock9		Cebpb		Clip3
Havcr2		Adam11		Tmem97		Nfic
Lyz2		Trp53i11		C1qa		Serpini1
Mylip		Cacnb4		C1s1		Zdhhc17
Tenm3		Gabrg2		Cavin2		Fry
Anpep		Atp2b2		Synpo		Ccnl2
Synpo		Lin7a		Lcp1		Spon1
Insig1		Sphkap		Kcnq5		Spock2
Vat1		Cnnm1		Aebp1		Zic1
Slit2		Mbnl2		Aacs		Adora1
Dglucy		Phyhip		Mt1		Rasl10b
Tram2		Eef1a2		Litaf		Agtpbp1
Tbxas1		Afap1l2		Ypel5		Nptn
Mvd		Cntnap1		Tgfb1		Atf7ip
Mmp3		Nrxn3		Tpm2		Kif1b
Sema3c		Ckmt1		Itgb2		Atrn
Timp1		Map3k5		Neu1		Clmp
Fcer1g		Fgf9		Dpp7		Scn8a
Pdlim1		Tshz1		Scd2		Scrn1
P4ha2		Scn2b		Sema3c		Adgrl1
Col8a1		Dact1		Mgat5b		Wnk2
Adra2c		Cbfa2t3		Plek		Ank2
Sdf2l1		Nptxr		Cyba		Clk1
Fam20c		Hap1		Naglu		Psd3
C1qb		Napb		Rpl23		Irf2bpl
Rnf128		Epb41l4b		Lgals1		Eml5
Aebp1		Jph3		Slc25a1		Aplp2
Msmo1		Mtus1		Slc1a5		Ablim1
Nsdhl		Rnf112		Ctsz		Tspan7
Itgb2		St18		Spp1		Gad1
Stard4		Zfp385b		Gla		Hectd4
Tgfb1		Adamts18		Lpl		Entr1
Capg		Tmem158		Vgll3		Wscd2
Lcp1		Cplx2		Pde10a		Helz
Anxa3		Abca7		Cyb5r1		Slc4a4
Cd276		Ptpn3		C1qb		Sptbn2
Ctsz		Ets2		Ppp1r14b		Zmiz1
Angpt2		Adcy1		Acta2		Mapk8ip2
Ccl2		Slc12a5		Tuba1c		Map2
C1qc		Ppp3ca		Casp3		Ndrg4
Cercam		Tcte1		Fnip2		Ttc3
Svep1		Sh2d1a		Atf5		Cyfip2
Vgll3		Rnf152		Edil3		Mast1
Slc37a2		Gprc5b		Rps28		Slc25a22
Gpd1		Fbxw7		Nrp1		Ank3
Aqp1		Lzts1		Ccnd2		Abhd16a
Tgfb2		Kcna1		Apol7d		Camk2d
Rftn1		Kcnc1		Thbs2		Dpp6
Myl9		Rps6ka1		Rpl34-ps1		Fnbp4
Ldlr		Sgpp2		Pfkl		Pcdh1
Thbd		Islr2		Timp3		Tet3
Crim1		Xkr7		Cd63		Pcbp4
Sulf2		Gabra1		Ctsd		Tnik
Hsd17b7		Galnt15		Creg1		Lsamp
Bc1		Maml3		Junb		Arid1a
Ahnak		Pde4a		Tubb3		Inpp4a
Perp		St8sia3		Bex3		Gnal
Pfkfb3		Ppfia4		Gabarap		Abca2
Acta2		Sez6l2		Rhoq		Pogz
Timp3		Lurap1		S100a6		Zfyve28
Fuca2		Lrrc3b		Glmp		Kif5c
Ggta1		Kcnk12		Mif		Disp2
Ccn4		Kirrel3		Odc1		Socs7
Slc2a1		Cacna1i		Hexa		Nrep
Gpc4		Ackr1		Mfsd1		Negr1
Lpp		Grin2a		Wdr38		Mcf2l
St6gal1		Arhgef3		Rpl35		Tecpr1
Ctss		Tmem59l		Rps19		Nav3
Cstb		Klf13		Plin2		Fzd3
Pmepa1		Faim2		Anxa1		Vldlr
Tmem202		Tmem266		Scpep1		Mapkbp1
Adam8		Fam131a		Csf1		Nexmif
Rai14		Ap1s2		Icam1		Vash1
Fbn2		Cadps2		Ctsc		Chl1
Tpm2		Hs3st1		Arpc1b		Fut9
Cd180		Dnm1		Rhob		B3gat2
Igfbp7		Pcsk2		Nbr1		Akt3
Flnb		Fgf12		Atf4		Grik2
Hmgcs1		St6galnac5		Rpl12		Nup210
Rgs5		Kcnq3		Tagln2		Mapk9
Pdgfrb		Pcsk2os1		Rnd2		Ryr2
Lss		Kcnn2		Tmem50a		Idh3g
Col11a1		Kcnc4		Cald1		Ski
Cyp51		Usp3		Rai14		Zbtb46
C3ar1		Olfm3		Rcn1		Cacna2d1
Piezo1		Kcnk3		Pcna		Iqcg
Jag1		Mctp1		Hspe1		Ubr1
Ctsb		Pcsk2os2		Pdgfrb		Marf1
Ms4a6d		Rasgrf1		Syn3		Map1a
Tcirg1		Mybpc3		Tnks1bp1		Herc3
Myof		Slitrk4		Col8a1		Nap1l2
Cd53		Rasd2		Aldh2		Dnajc6
Hmgcr		Tnr		Rps18		Zfyve9
Cd44		Epn3		Lpcat1		Syt1
Dapk1		Rtn4rl1		Itga5		Dmxl2
Mrc1		Cdh22		C1qc		Dtna
Laptm5		Etv1		Hexb		Arhgap44
Fbn1		Slitrk1		Pip4p1		Dixdc1
Loxl1		Neb		Rps12		Micu1
Dhcr24		Snap25		Rps13		Syt2
Uap1l1		Slc6a13		Rplp1		Plppr4
Lilr4b		Col9a1		Anpep		Mapk10
Grik3		Fstl4		Lcn2		Gramd1b
Phldb2		Nptx1		Adam8		Gphn
Gusb		Eomes		Rps17		Cbx6
Itpripl2		Necab3		Rhoc		Cacna1g
Sh3bgrl2		Arhgap26		Fam20c		Prepl
Cfh		Gabrd		Anxa5		Ogt
Myo1e		Sstr2		Sc5d		Ntrk3
Egfr		Ramp3		Apoe		Apba2
Plek		Tunar		Rpl31		B4galt6
Akap12		Tmem63c		Acly		Bmp1
Itsn2		Tesc		Tpm4		Plxna1
Flnc		Vsnl1		Flcn		Pgm2l1
Pld3		Ipcef1		Anp32b		Wasf1
Igf1		Gabra6		Pld3		Brpf1
Emp1		Unc13c		Eif1a		Gab1
Snx8		Cbln3		Man2b2		Ahi1
Gdpd5		Wnt7a		Mdk		Dip2b
Adamts1		Rims3		Selenow		Adgrb3
Ccdc80		Sowaha		Lyz2		Kcnk1
Gla		Slc8a2		Tkt		Cntnap2
Tns1		Slc17a7		Kctd10		Amph
Rdh11		Cdh15		Phldb2		Nrxn1
Col5a2		Sv2c		Rpl28		Fbxo11
Cald1		Slc16a11		Pdia6		Dock9
Actn1		Egr4		Acaca		Cbln1
Enpp1				Gxylt2		Oxr1
Msrb3				Lmna		Tanc1
Nckap1l				Srebf1		Arl5a
Hexb				Lamtor1		Als2
Slc16a6				Rpl10a		Dcaf7
Tlr13				Klf6		Chn2
Itpkb				Nbl1		St3gal5
Fnip2				Uaca		Rbfox1
Lbh				Grtp1		Mlxip
Cd248				Cotl1		Rnf19b
Scd1				Gusb		Kif13a
Man2b2				Homer2		Car10
Mfge8				Ctsb		Cadm2
Tcn2				Slc20a1		Agap2
Fasn				Cdkn1a		Cldn12
Litaf				Tceal9		Syt7
Myh9				Hsd17b12		Neto2
Mt1				Dab2		Srcin1
Itga5				Eln		Gpm6a
Icam1				Tubb2b		Grin1
Rragd				Rpl27a		Serinc5
Lcn2				Rpl14		Mapre3
Cyp26b1				Lgmn		Pan3
Gxylt2				Rps7		Ephb2
Prdm8				Rps26		Dlg3
Tln1				Mroh1		Akap11
Tmeff1				Wls		Luc7l3
Gsn				Rps9		Kbtbd7
Bcat1				Eef1g		Adgrl3
Slc39a14				Ccdc80		Pcdh9
Eng				Gaa		Satb1
Prss23os				Npm1		Prkce
Lrrc32				Myh9		Sv2b
Plod2				Rps2		Arhgef9
Wls				Col4a1		Emsy
Hexa				Tnfrsf21		Pnmal2
Osmr				Ldha		Iqsec1
Ctsc				Cd44		Fam131b
Tbc1d1				Rpl21		Ppp6r2
Nbr1				Rps27a		Cdon
Basp1				Rpl32		Mat2b
Dhcr7				Gns		Epb41l1
Plxnd1				Itgb1		Bsn
Sat1				Fn1		Boc
Loxl2				Ppia		Kcnq2
Dock1				Rpl9		Neurl1a
Apobec1				Col4a2		Eno2
Syn3				Actn1		Foxn2
Dkk3				Por		Limch1
Slc12a4				Rpl23a		Arhgap21
Cd68				Rps24		R3hdm2
Npc2				Mbp		Kcna2
Acat2				Emp1		Apod
Itgb1				St13		Cxxc5
Mpeg1				Ahnak		Ppp2r2c
Nrp2				Tlcd1		Slc8a1
Csrp1				Dpysl5		Ndrg3
Nceh1				Sulf1		Dlg4
Homer2				Rps3		Kdm7a
Steap3				Mrc2		Alms1
Anxa1				Rps14		Adamts18
Gaa				Tln1		Olfm1
Hspg2				Rps11		Cmip
Naglu				Mpeg1		Chrnb2
Idh1				Rps4x		Cnpy1
Eln				Cyb5b		Klhl3
Axl				Prnp		Nedd4l
Tnfrsf21				Ctsa		Atp6v1g2
Zeb2				Anxa2		Rnf152
Timp2				Gfm2		Abtb1
Soat1				Rpl17		Sh3gl2
Igf2r				Col5a2		Numbl
Anxa2				Vcl		Atp1a1
Mrc2				Cfh		Klf9
Lgmn				Grn		Per3
Cdkn1a				Sgpl1		Ccp110
Heg1				Dcx		Rab3c
Col1a1				Lamp2		Chd7
Nrp1				Ybx1		Grin1os
Vcl				Akap12		Purb
Col4a1				Rpsa		Celsr2
Tgm2				Rack1		Zfp219
Pros1				Serpinh1		Syn2
Col12a1				Rpl18a		Gabrb3
Tead1				Rpl10		Syt9
Plec				Rpl4		Tmem158
Myo1c				Rpl7		Ptch1
Sulf1				Col1a2		Nefm
Bgn				Tmsb4x		Fgf14
Fads1				P4hb		Barhl2
Iqgap1				Lamp1		Prune2
Mmp2				Fth1		Camkk2
Fbln1				Tubb5		Gprin1
Gns				Sparc		Cbfa2t3
Mroh1				Vim		Tmem35a
Lrpap1						Zfand5
Amotl2						Spred2
Cd63						Pik3r3
Col4a2						Nsf
Mmp14						Nmnat2
Arpc1b						Asxl2
Mfsd1						Brinp1
Srebf2						Astn2
Adgra2						Spock1
Gas6						Shisa6
Tpp1						Ptprd
Rrbp1						Mpp3
Dab2						Mindy1
Tnc						Map7d2
Anxa5						Fam78b
Prss23						Phlpp1
Lipa						Kifc2
Msn						Dnm3
Acly						Megf11
Ctsa						D5Ertd579e
Fstl1						Phactr1
Qsox1						Fbxl16
Fads2						Hivep2
Ldha						Sptbn4
Rhob						Mpp7
Zyx						Asic2
Asah1						Neurod1
Col1a2						Adgrb2
Flna						Eps8
Vim						Golga7b
Grn						Hecw2
Il6st						Gse1
Lrp1						Bicd1
Lamp1						Rnf123
Lamc1						Atxn7
Sparc						Dlgap3
Psap						Fam19a5
Scd2						Nefl
						Nap1l5
						Mfsd6
						Plxnb1
						Stx1b
						Cacna1a
						Zdhhc22
						Rnf112
						Phf21a
						Ablim3
						Atp2b3
						Tle3
						Gabrg2
						Camta2
						Srgap2
						Cacna1i
						Kcnmb4
						Dab2ip
						Sema4c
						Cacng2
						Kcnj3
						Carmil2
						Sel1l3
						Fam84a
						Khnyn
						Dot1l
						Tmem132a
						Rims2
						Maml3
						Dgkz
						Tenm1
						Zfp46
						Frmd6
						Camk2b
						Cnksr3
						Kcnip3
						Ccdc92
						Adam11
						Hivep1
						Cacna1e
						Fbxo41
						Chgb
						Zfp703
						Dpf3
						Lrrc49
						Trhde
						Sybu
						Peg3
						Trp53i11
						Gabbr2
						Lyst
						Fnbp1
						Kcnc3
						Mir124a-1hg
						Cabin1
						Sorl1
						Phyhip
						Mtcl1
						Rap1gap
						Tshz1
						Rab15
						Dlgap1
						Rph3a
						En2
						Stxbp5l
						Unc5a
						Tmem151b
						Usp46
						Paqr9
						Pclo
						Trim62
						Rps6ka1
						Tmem59l
						Igfbp3
						Tet1
						Sgpp2
						Slc8a3
						Jarid2
						Napb
						Tubb4a
						Adam23
						Erc1
						Sptb
						Atp2b4
						Dusp5
						Ust
						Wipf3
						Atp1b2
						Eml6
						Lrp8
						Cnnm1
						Dgkd
						Rbfox3
						Ptpru
						Kcnj12
						Iqsec2
						Kcnd2
						Tiam1
						Slc6a1
						Unc79
						Btbd3
						Dab1
						Rif1
						Ajm1
						Jph1
						Kcnk10
						Scn2b
						Nhsl2
						Ptprj
						Cdh7
						Jph3
						Ppp3ca
						Cacna2d2
						Cadm3
						Cacnb4
						Cplx2
						Pak1
						Gpr158
						Cdkl5
						Atp8a1
						Madd
						Igsf9b
						Tbc1d8
						Tmeff2
						Adam22
						Lrrtm3
						Slc29a4
						AC137853.2
						Lurap1
						Fbxw7
						Mbnl2
						Frrs1l
						Grm4
						Gabrb2
						Camk4
						Lrp1b
						Slc12a5
						Ckmt1
						Kcnab1
						St18
						Adcy1
						Sphkap
						Hap1
						Lingo3
						Unc80
						Sez6l2
						Lin7a
						Gabra1
						Galnt15
						Fndc5
						Grin2a
						Zim3
						Disp3
						Ipcef1
						Ap1s2
						Slc32a1
						Ackr1
						Fam169a
						Slitrk1
						Fgf12
						Kndc1
						Pcsk2
						Dock4
						Fam131a
						Dact1
						Faim2
						Usp29
						Ccdc3
						Col9a1
						Dync1i1
						Map3k5
						Arhgef3
						Cnksr2
						Slc15a2
						Strip2
						Ppfia4
						Mtus1
						Scn2a
						Nrxn3
						Tmem266
						Zfp385b
						Kcnk3
						Cntnap1
						Cdh22
						Rnf122
						Klhl34
						Ptpn3
						Atp2b2
						Pcsk2os2
						Kirrel3
						Gprc5b
						Galnt13
						Iqck
						Lzts1
						Epb41l4b
						Mctp1
						Phactr3
						Cadps2
						Nptxr
						Lgi1
						Dnm1
						Hs3st1
						Kcnc1
						Cbln3
						Kcna1
						Rtn4rl1
						Usp3
						Mybpc3
						Lrrc3b
						Hr
						Gabrd
						St8sia3
						Snap25
						Xkr7
						Kcnj9
						Eef1a2
						Islr2
						Nptx1
						Necab3
						Slitrk4
						Neb
						Klf13
						Vsnl1
						Kcnq3
						Kcnk12
						Unc13c
						Etv1
						Gabra6
						Arhgap26
						Wnt7a
						Fstl4
						Rims3
						Olfm3
						Tunar
						Slc8a2
						Sv2c
						Slc17a7
